# Supplementary material for: Genetic Diversity and Trends of Ancestral and New Inbreeding in German Sheep Breeds by Pedigree Data
Source: MDPI journal article supplement (doi:10.3390/ani13040623), 2023-02-10

**Figure S5.** Ancestral inbreeding coefficients according to Baumung (AHC), Ballou ( $F_{a\_Bal}$ ), Kalinowski ( $F_{a\_Kal}$ ) and the new inbreeding coefficient according to Kalinowski ( $F_{a\_New}$ ) for the birth years 2010 to 2020 for each of the 35 sheep breeds in Germany.

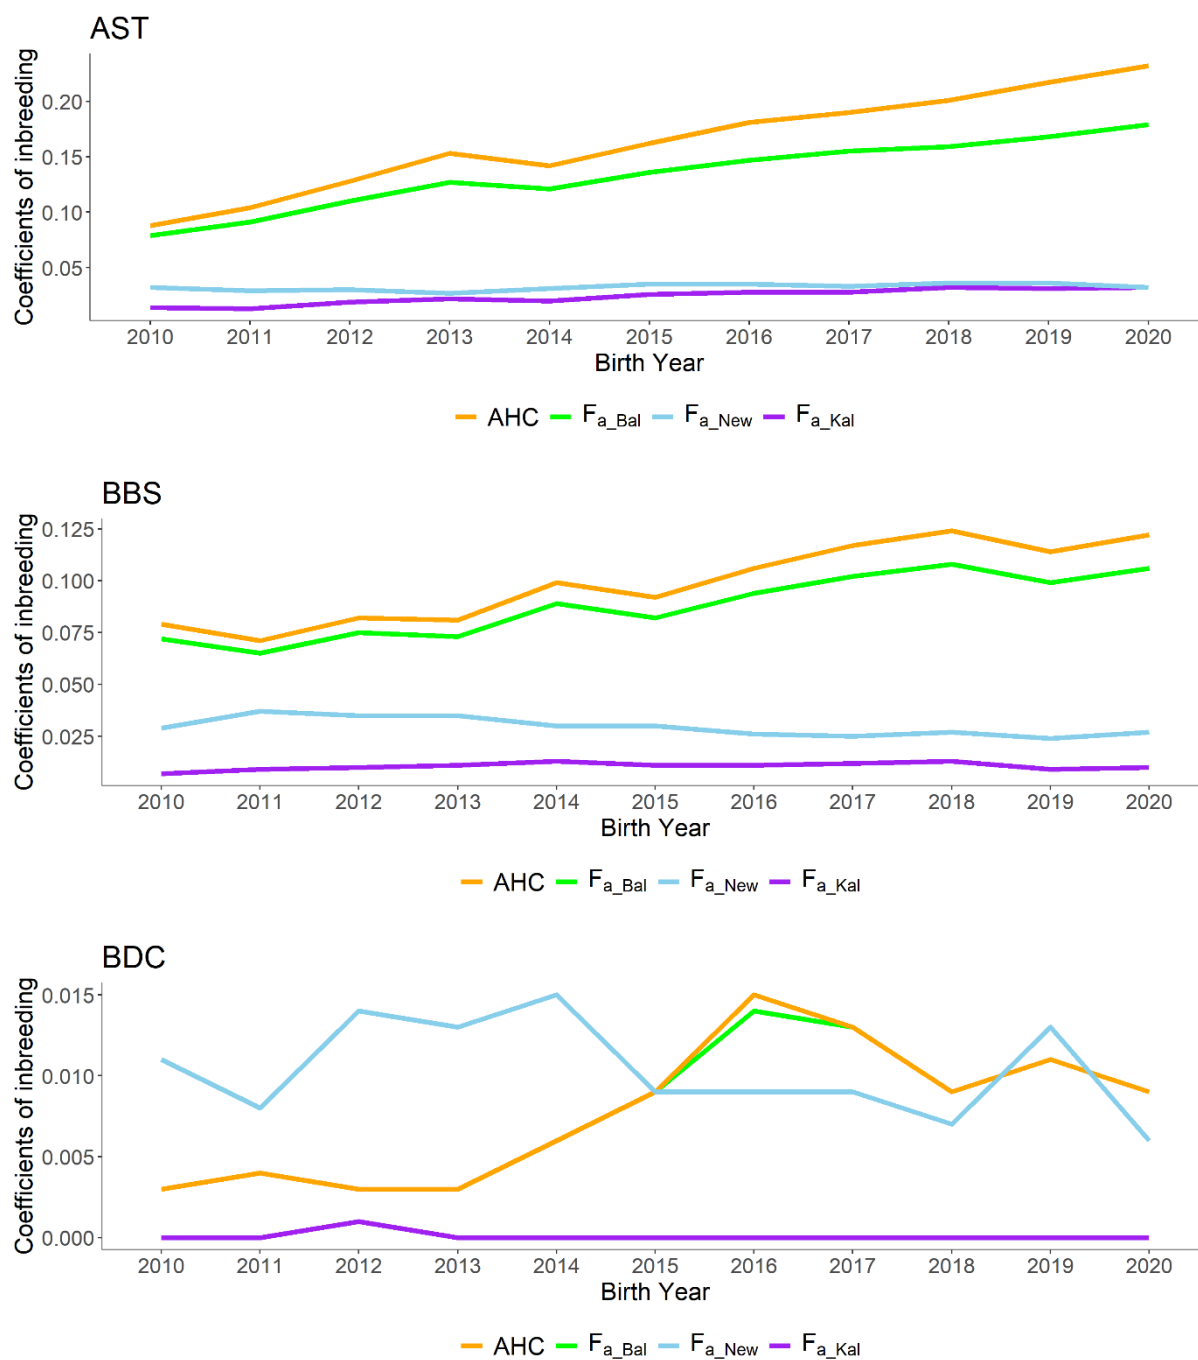

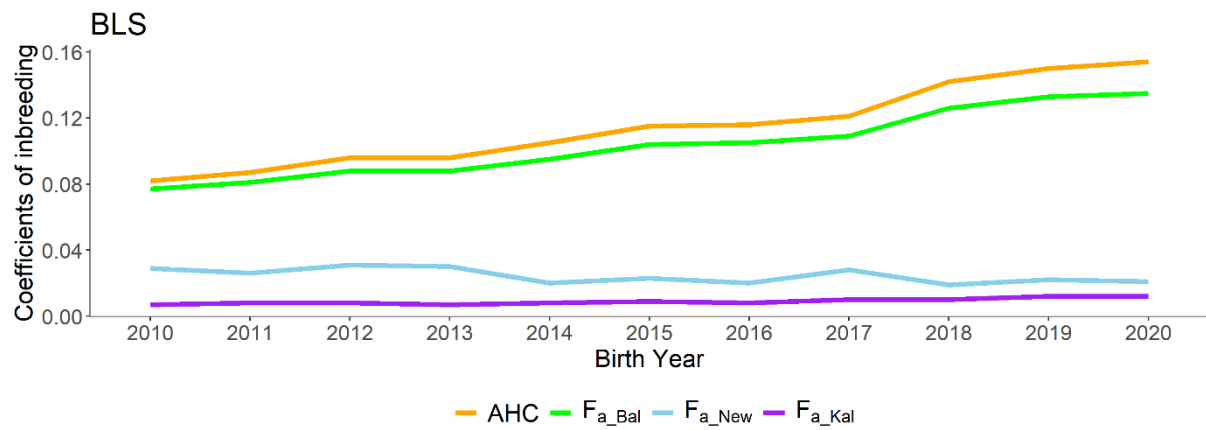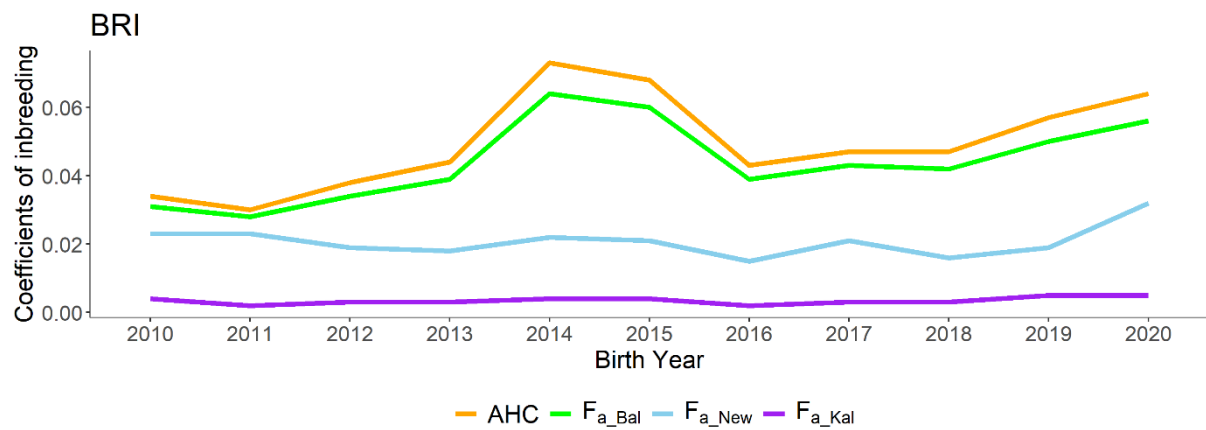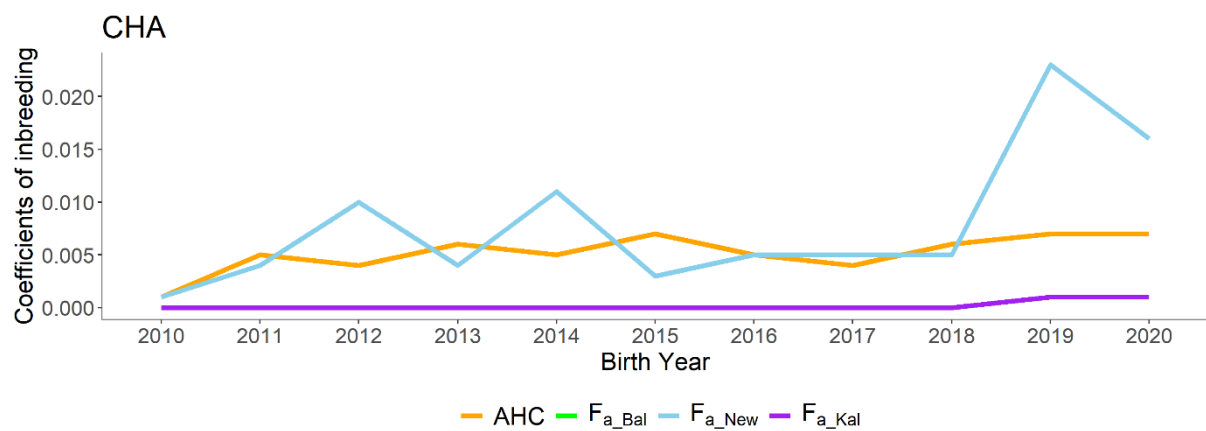

CHA, AHC and  $F_{a\_Bal}$  showing exactly the same values.

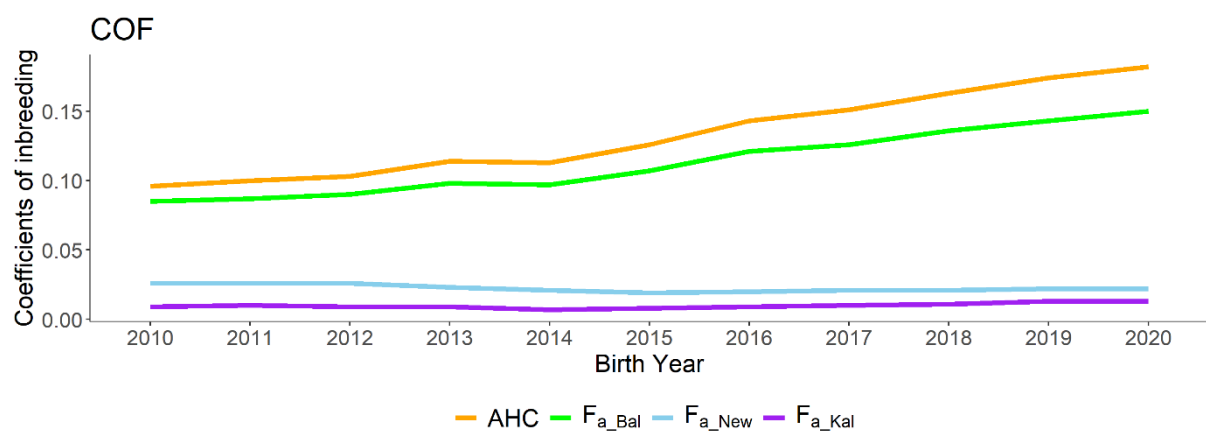

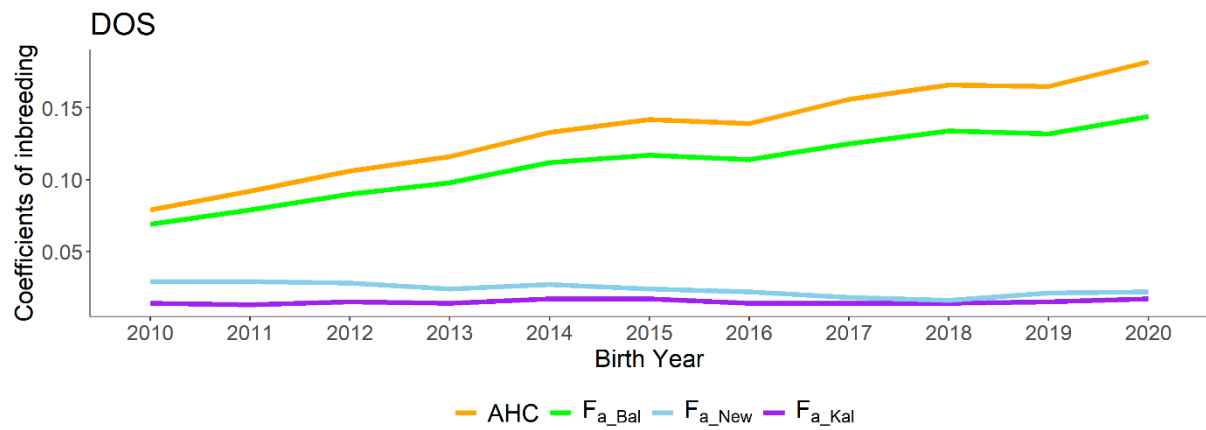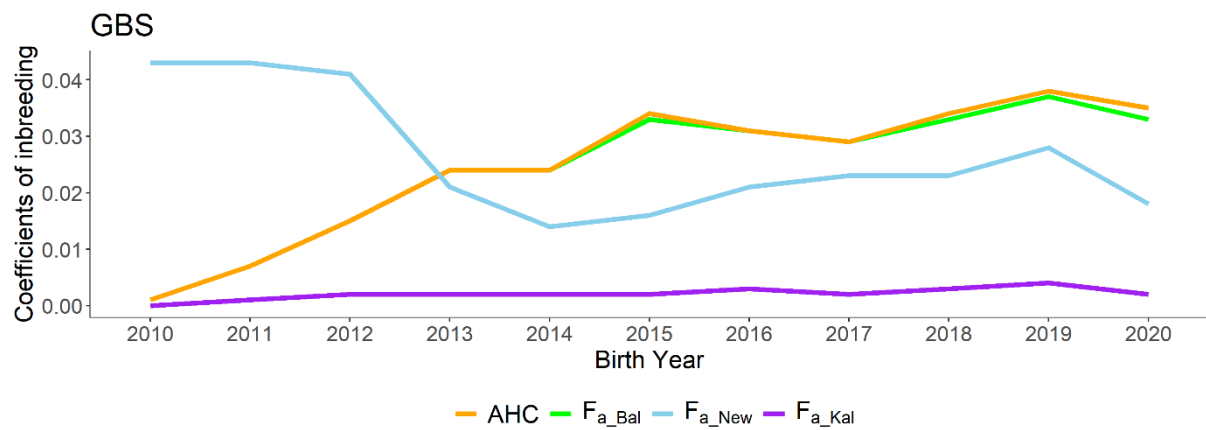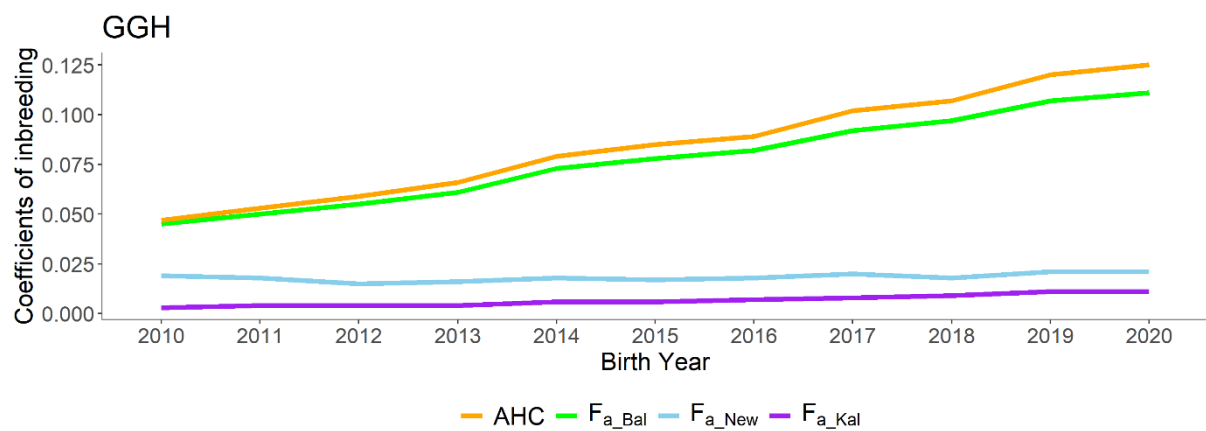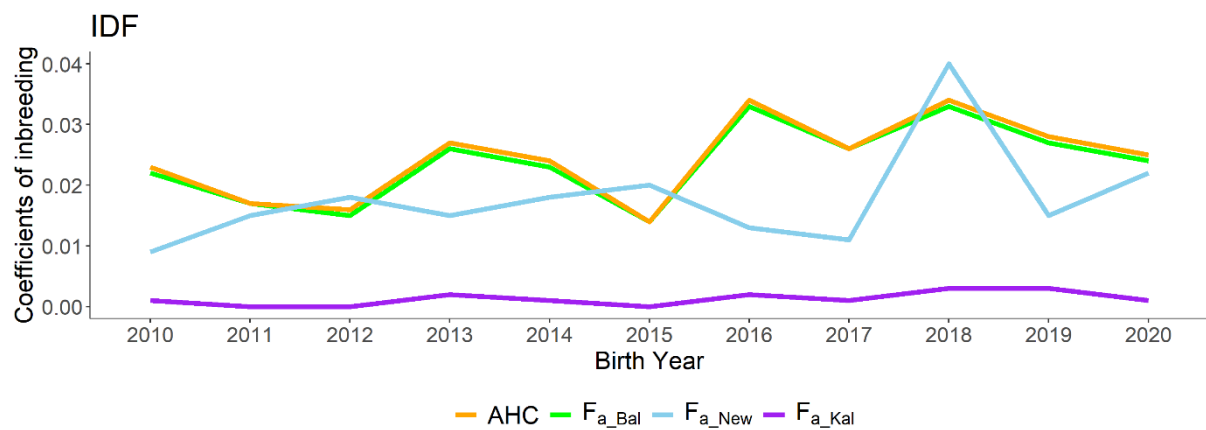

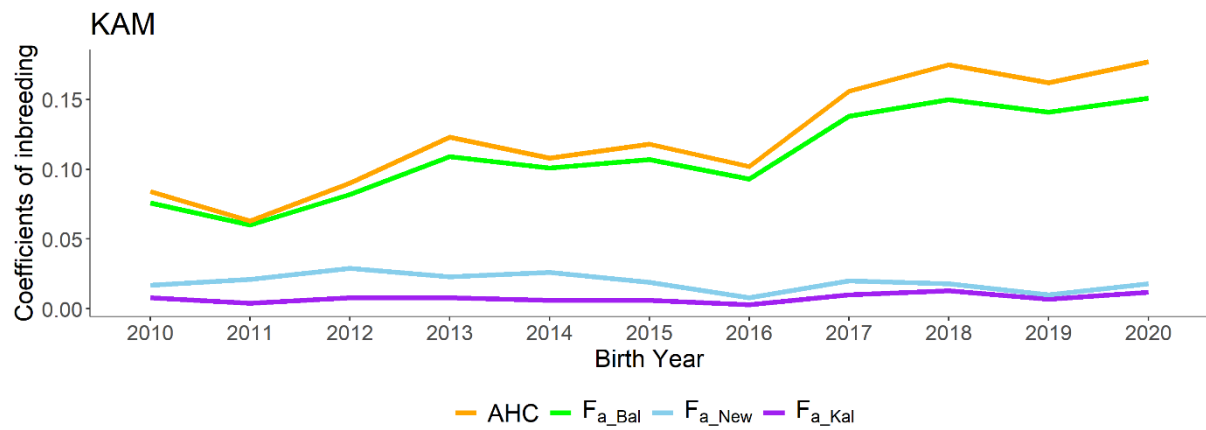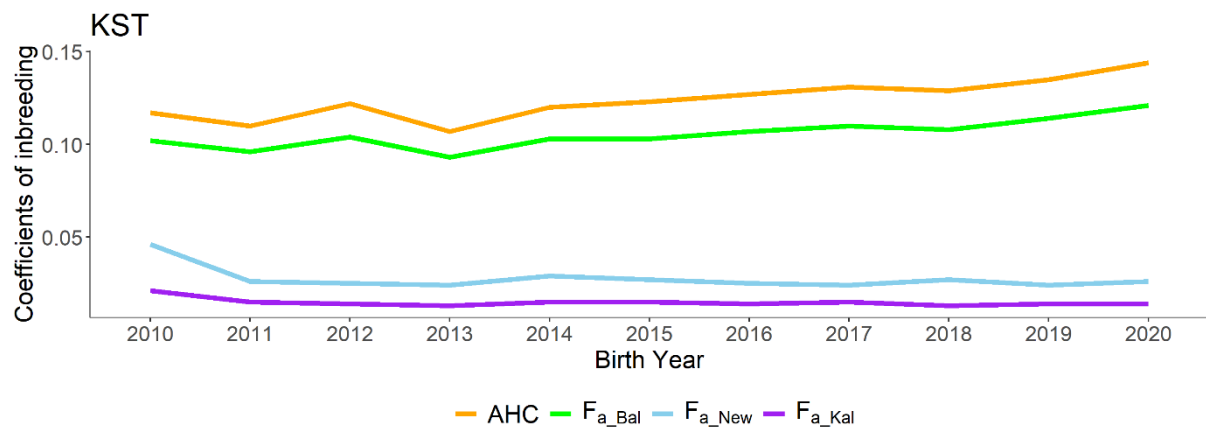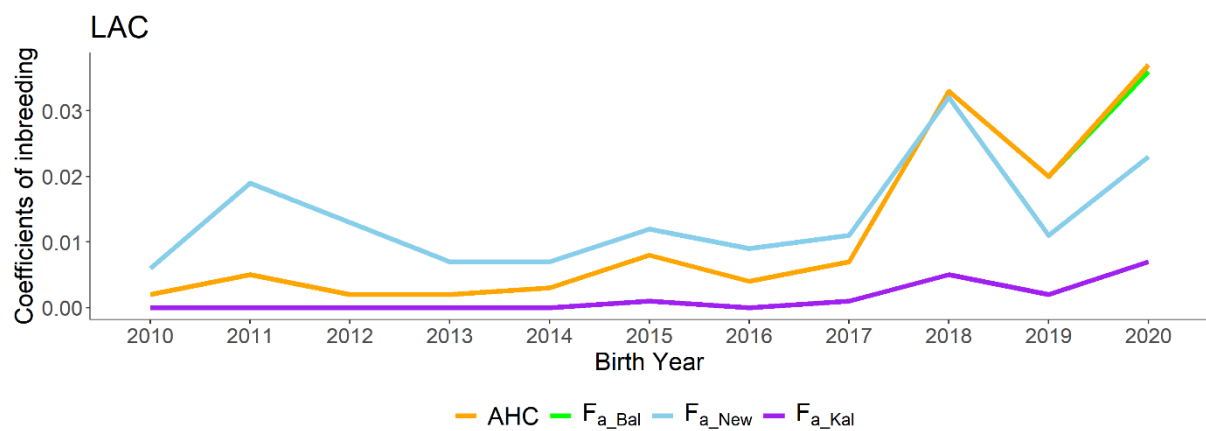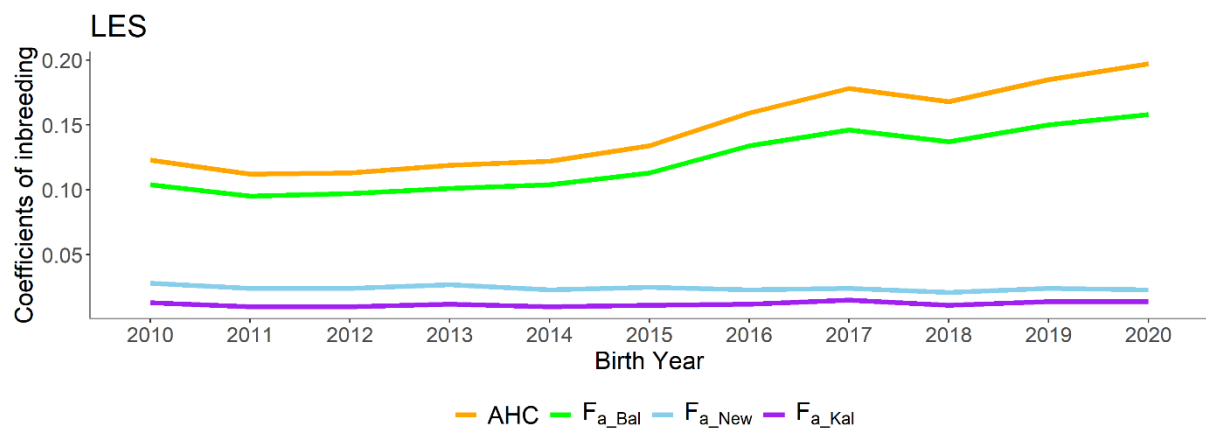

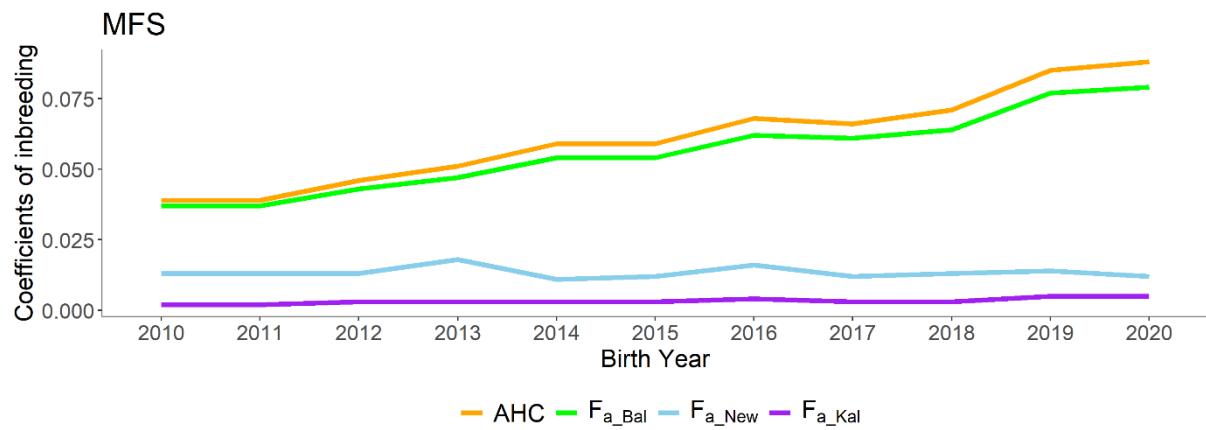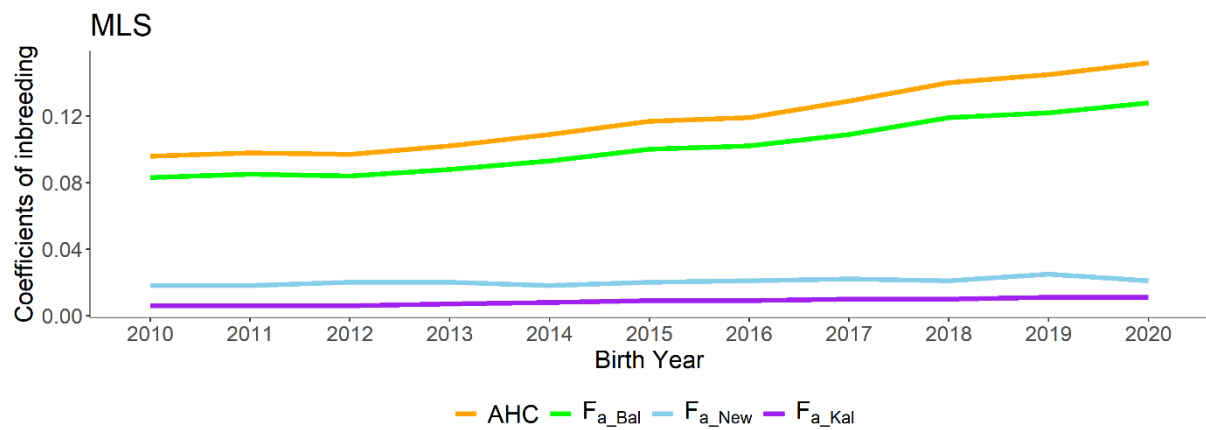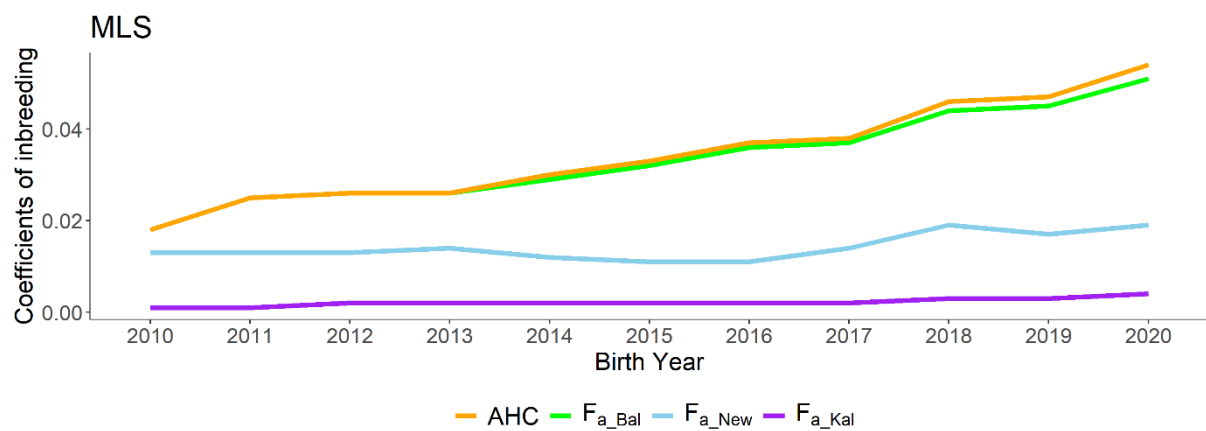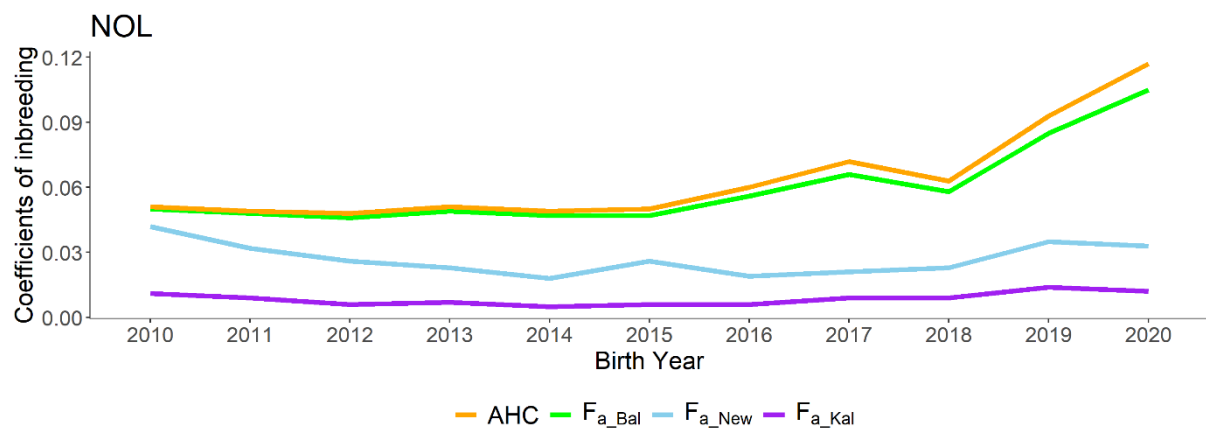

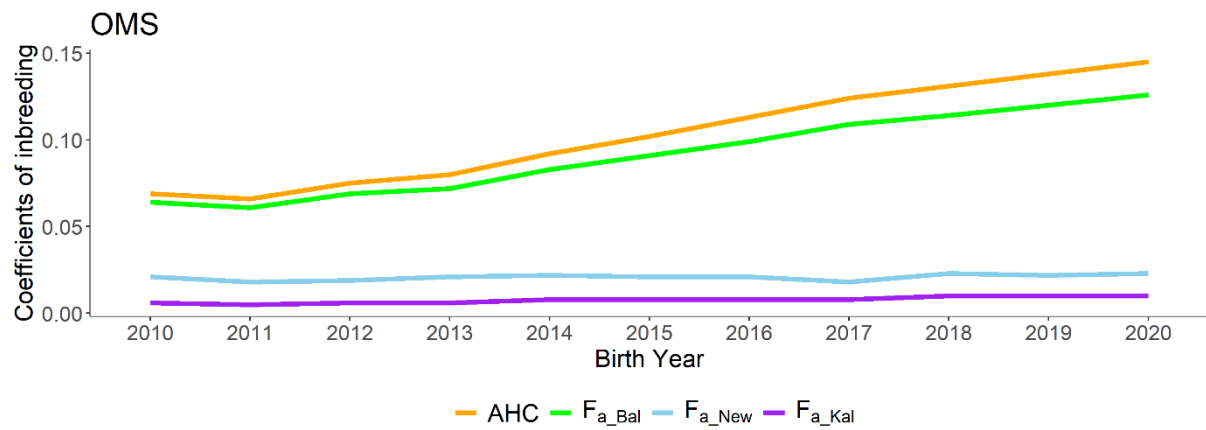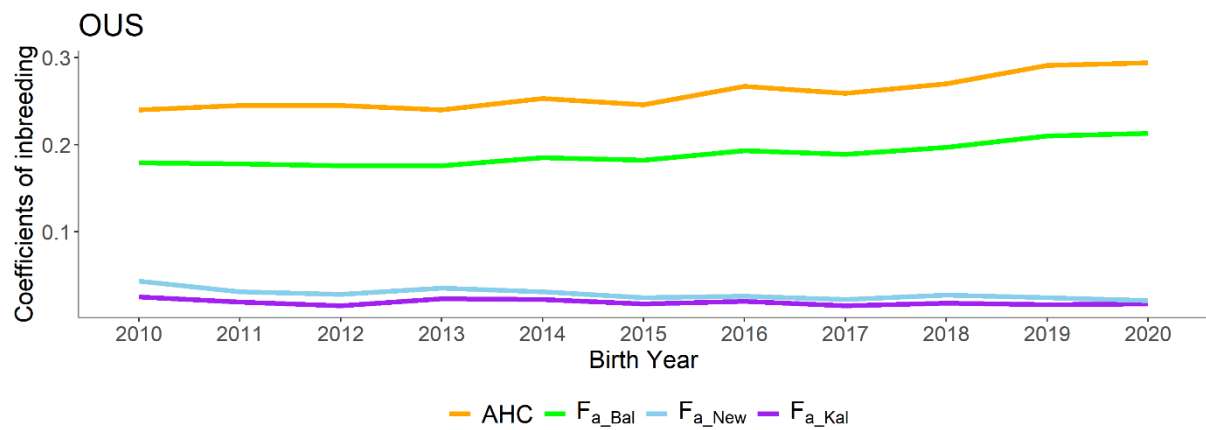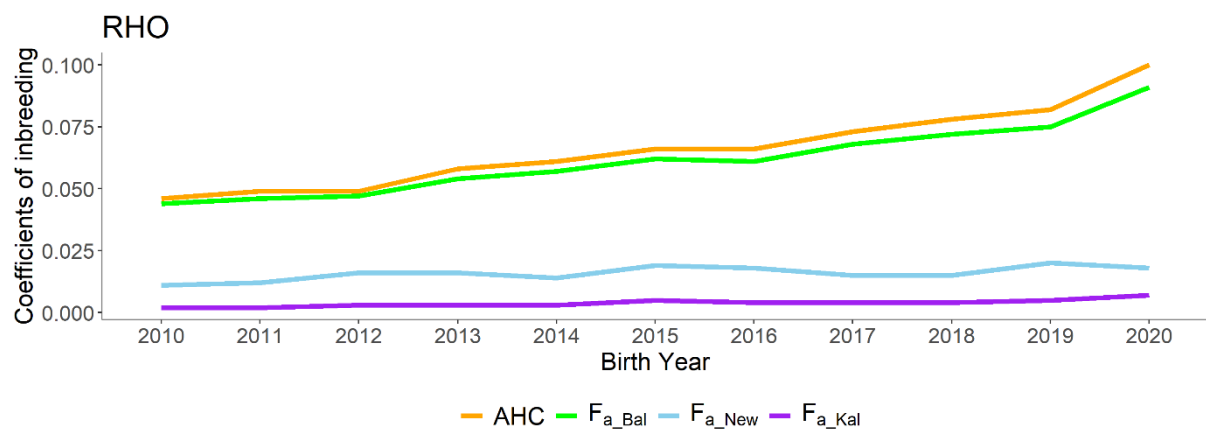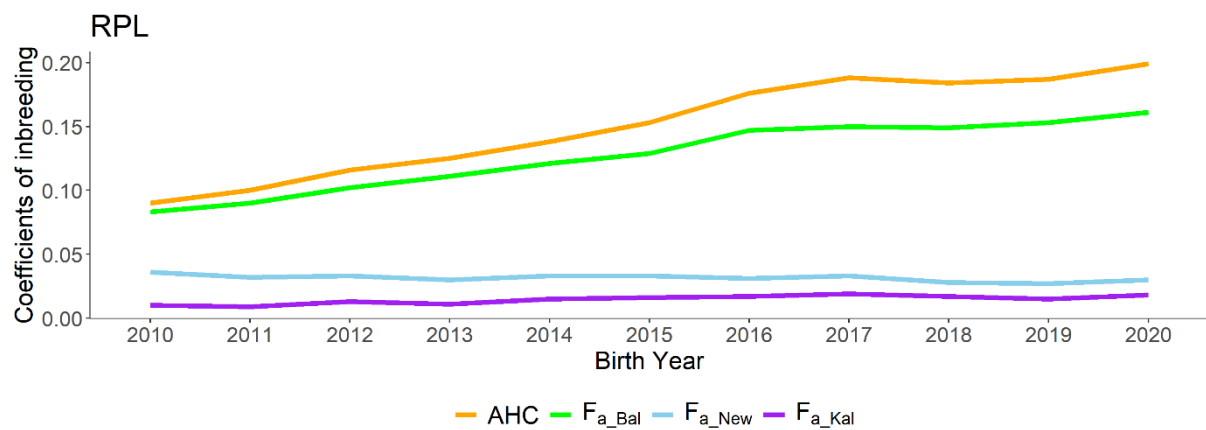

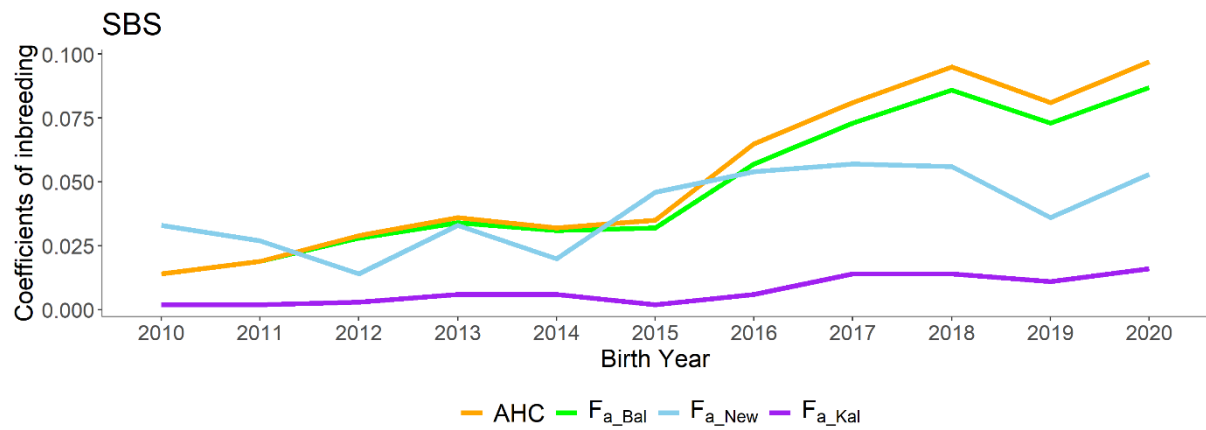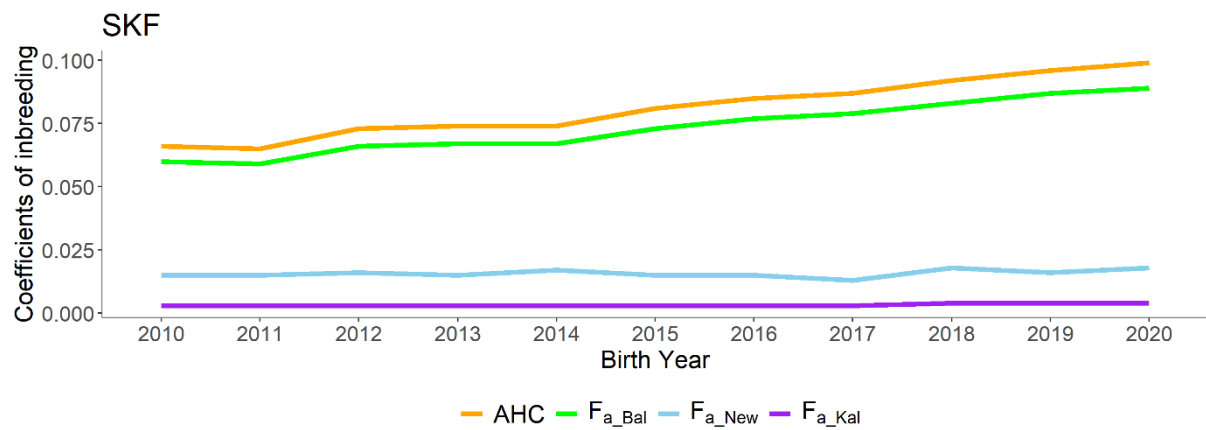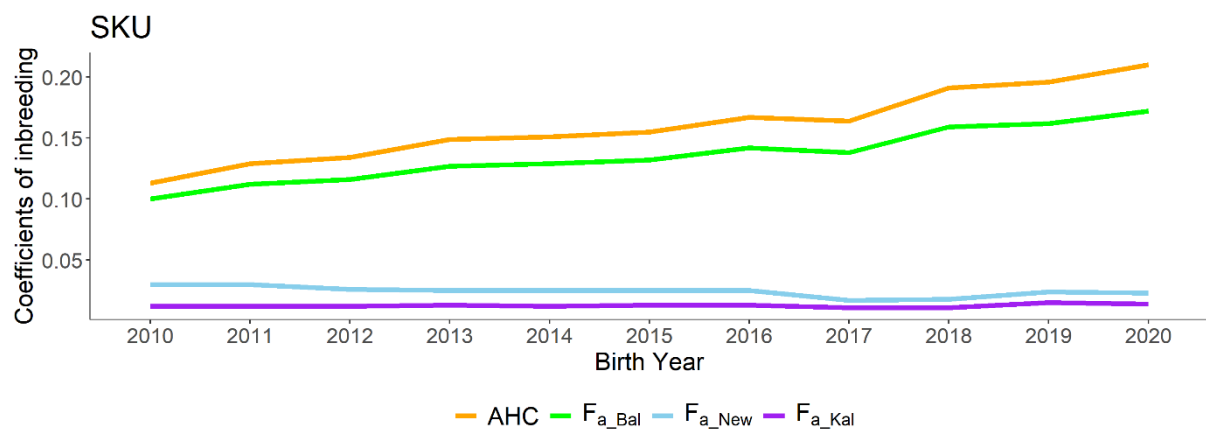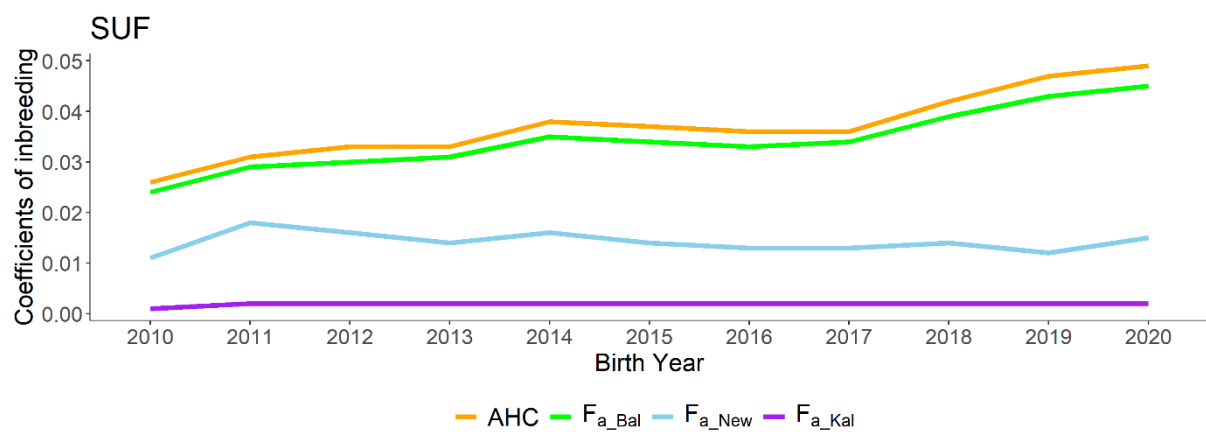

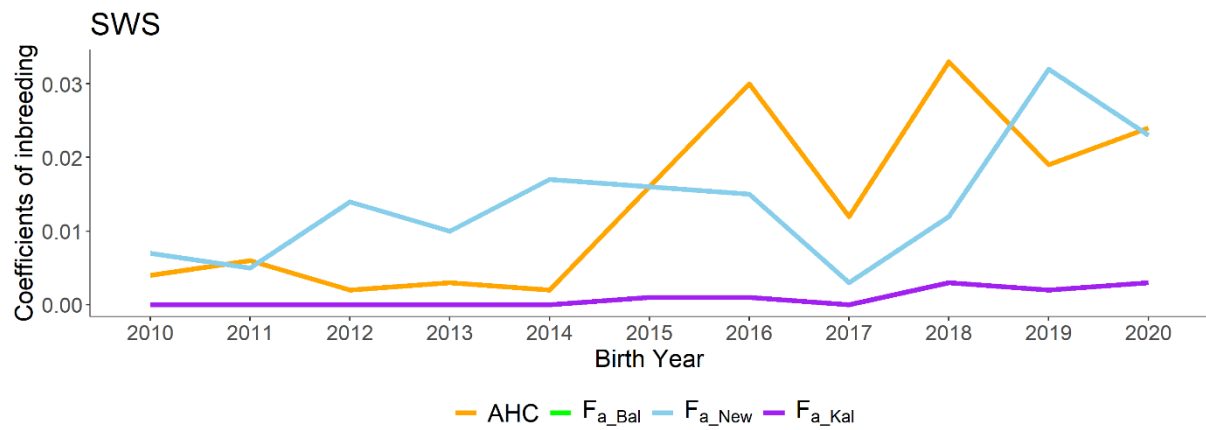

SWS, AHC and  $F_{a\_Bal}$  showing exactly the same values.

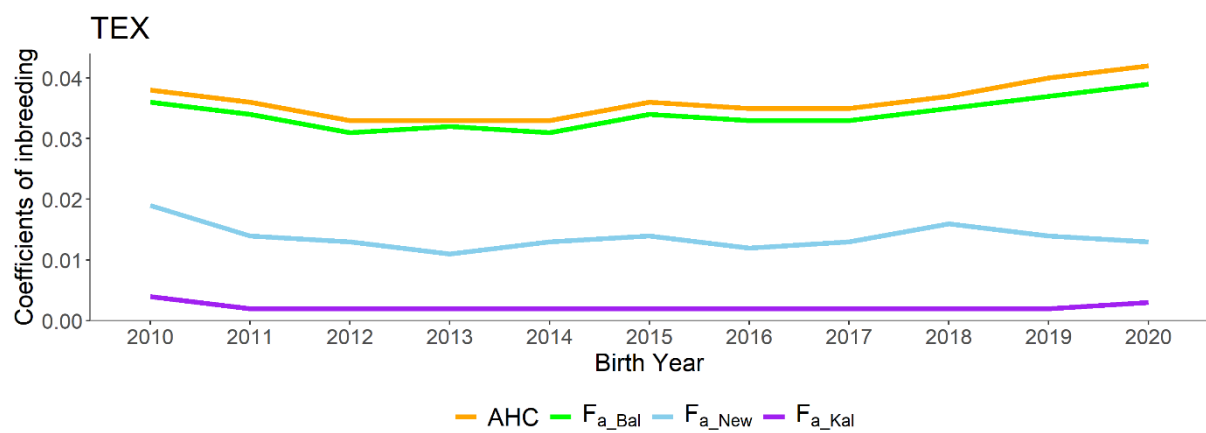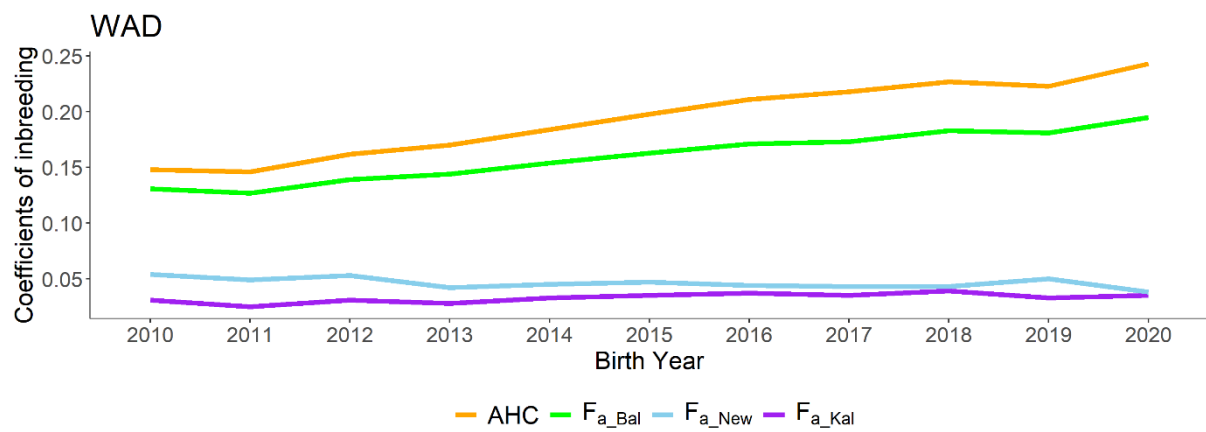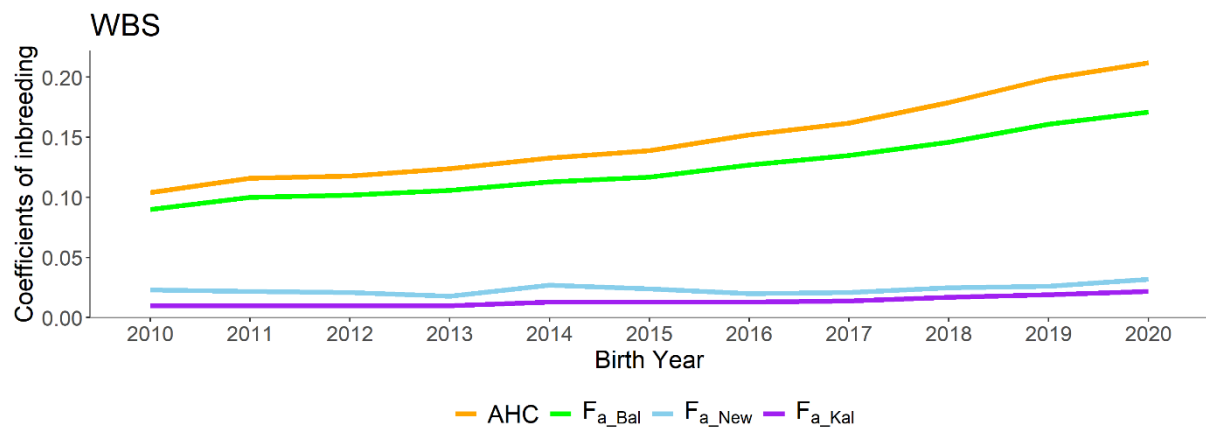



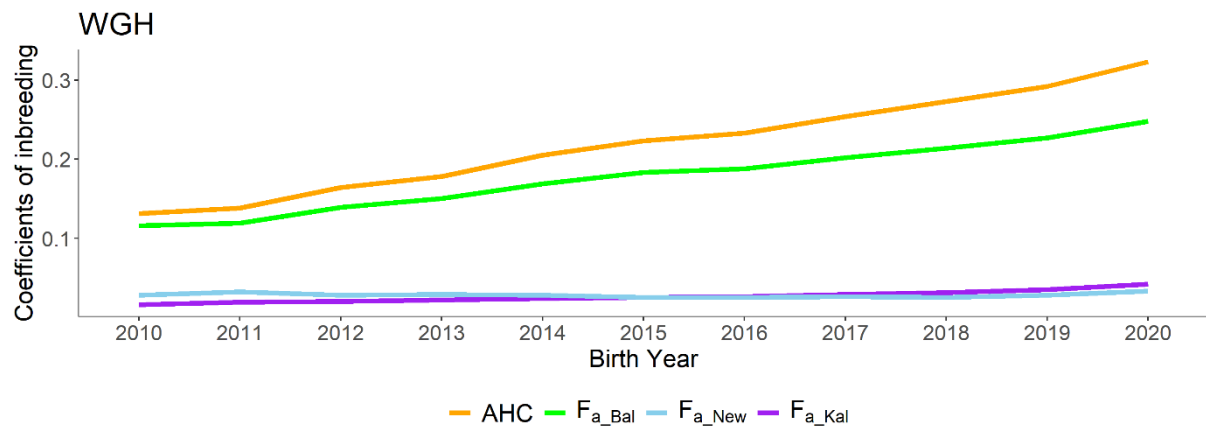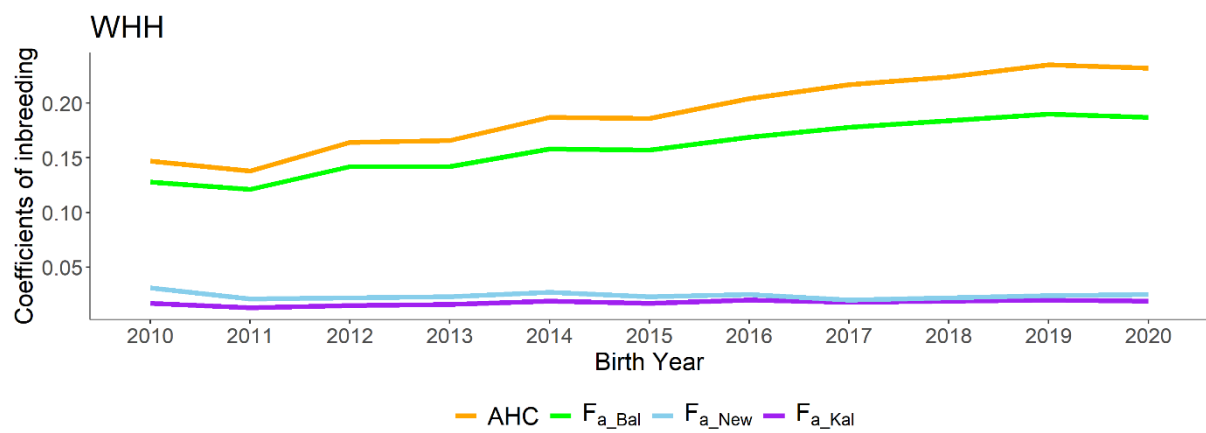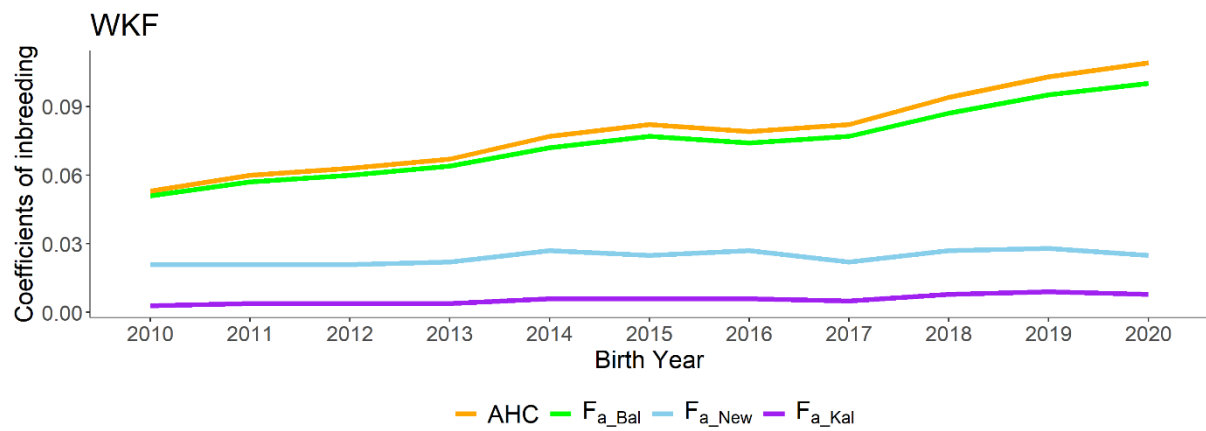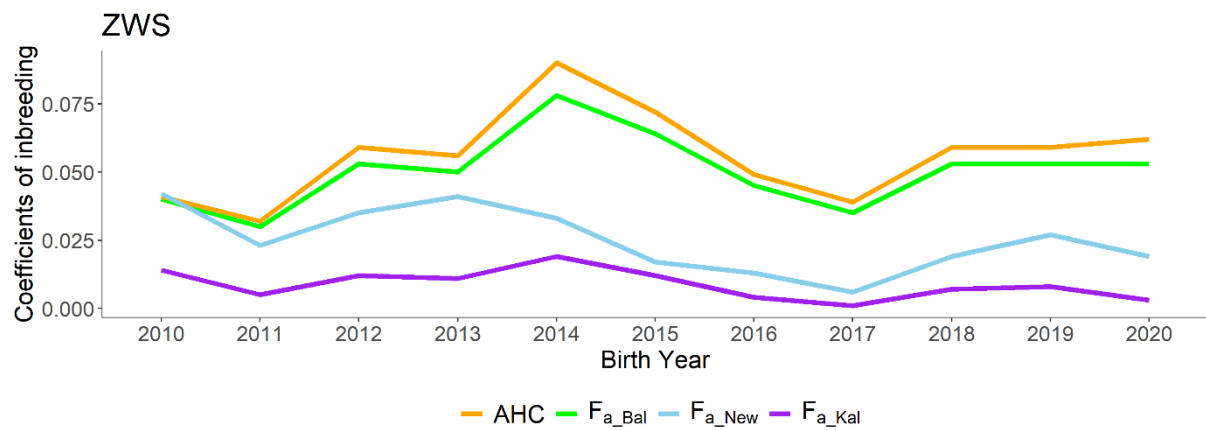

Supplement: s1 [file s1]
