# Supplementary material for: Genetic Diversity and Trends of Ancestral and New Inbreeding in German Sheep Breeds by Pedigree Data
Source: MDPI journal article supplement (doi:10.3390/ani13040623), 2023-02-10

**Figure S3.** Inbreeding coefficients for all (F) and only inbred animals ( $F_{\text{inbred}}$ ) as well the proportion of inbred animals for the birth years 2010 to 2020 for each of the 35 sheep breeds in Germany.

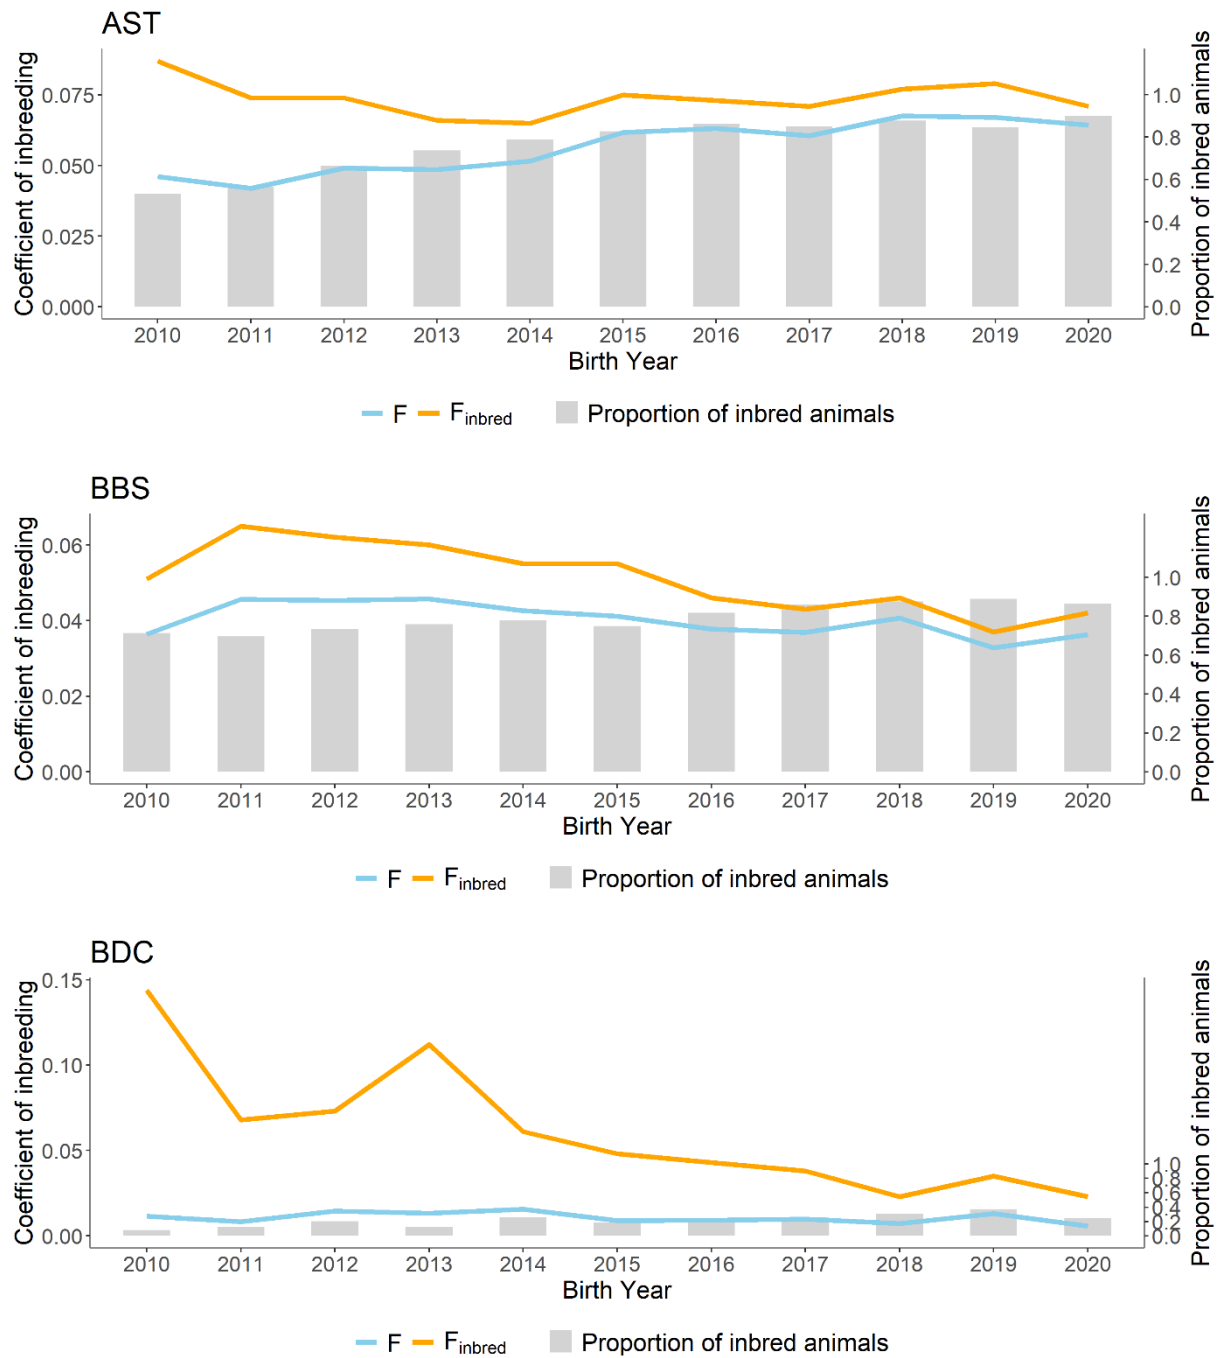

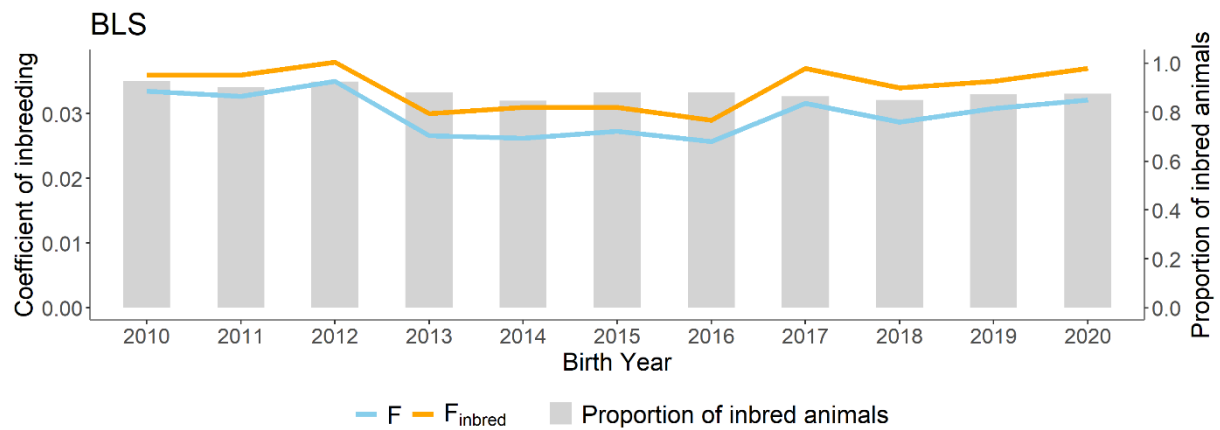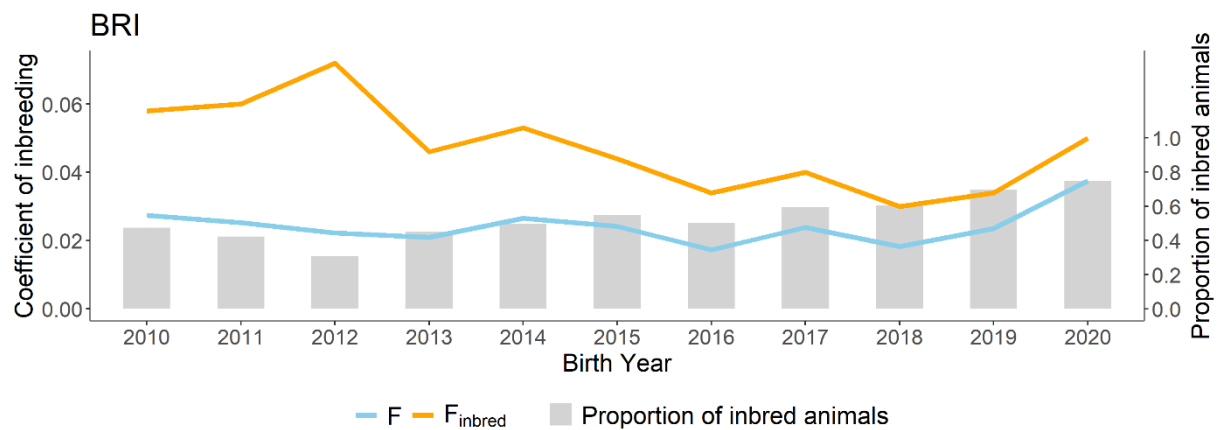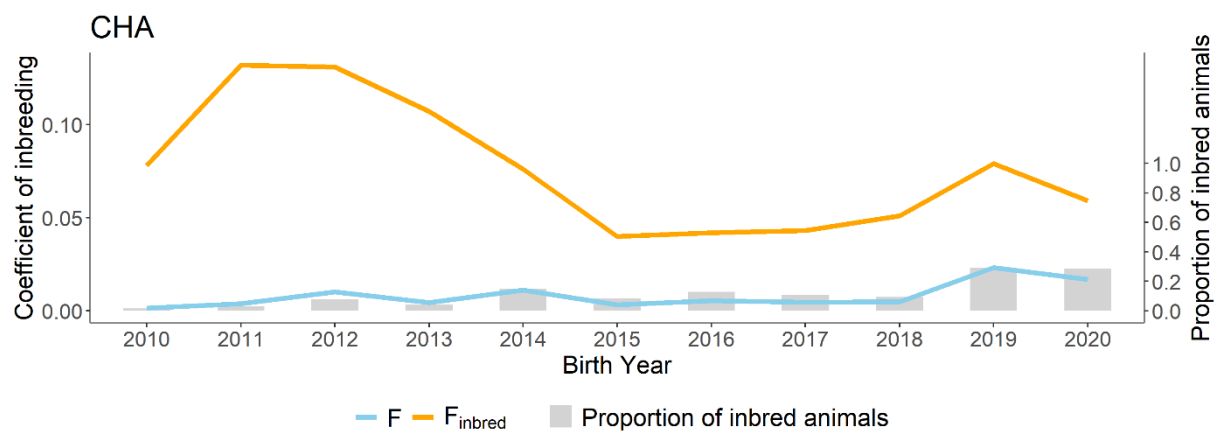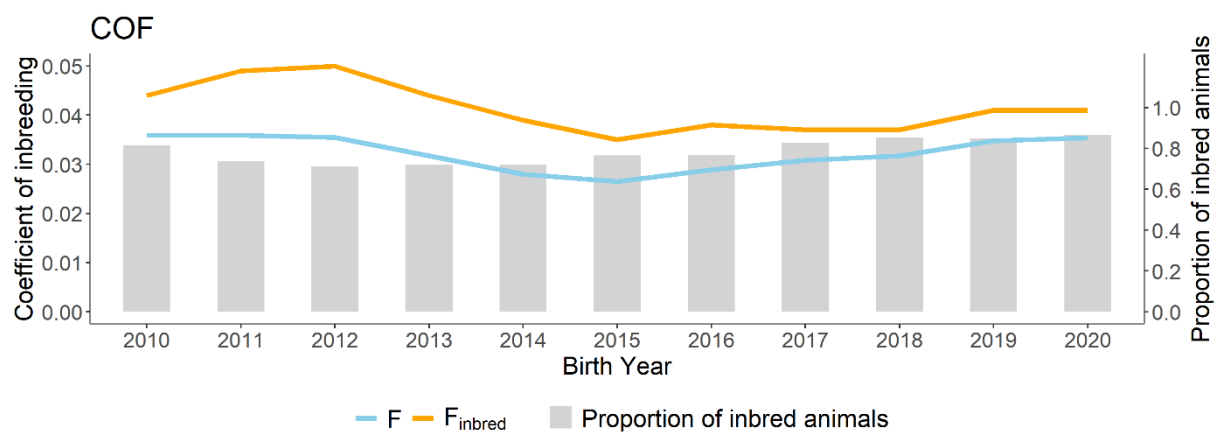

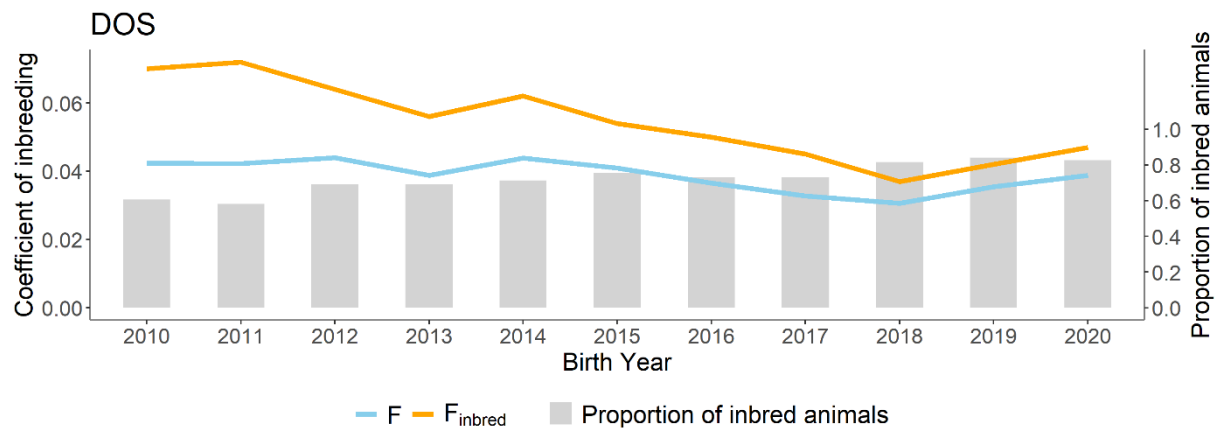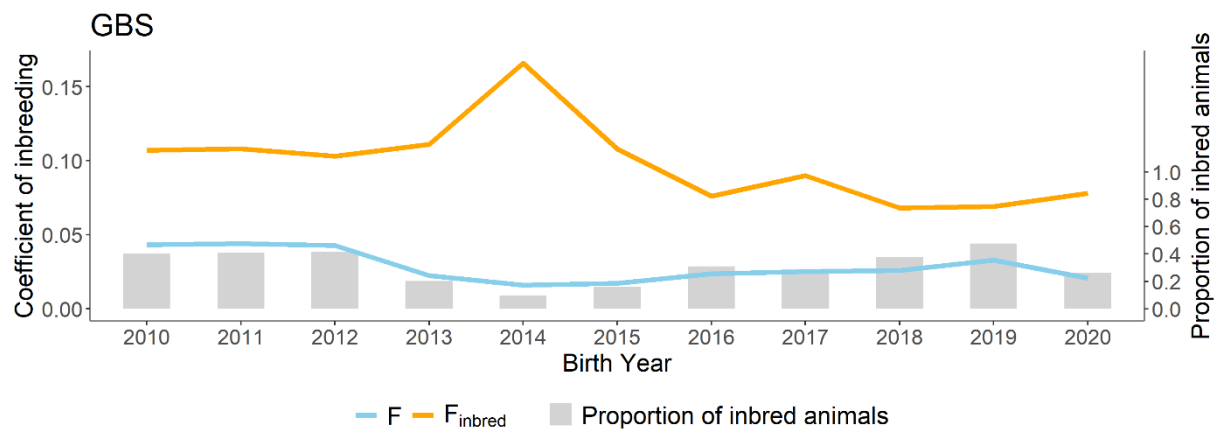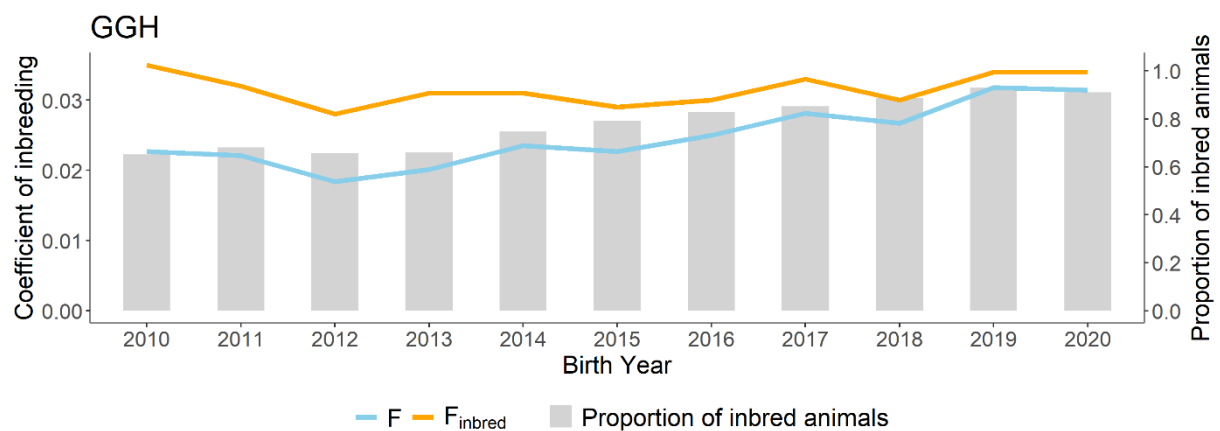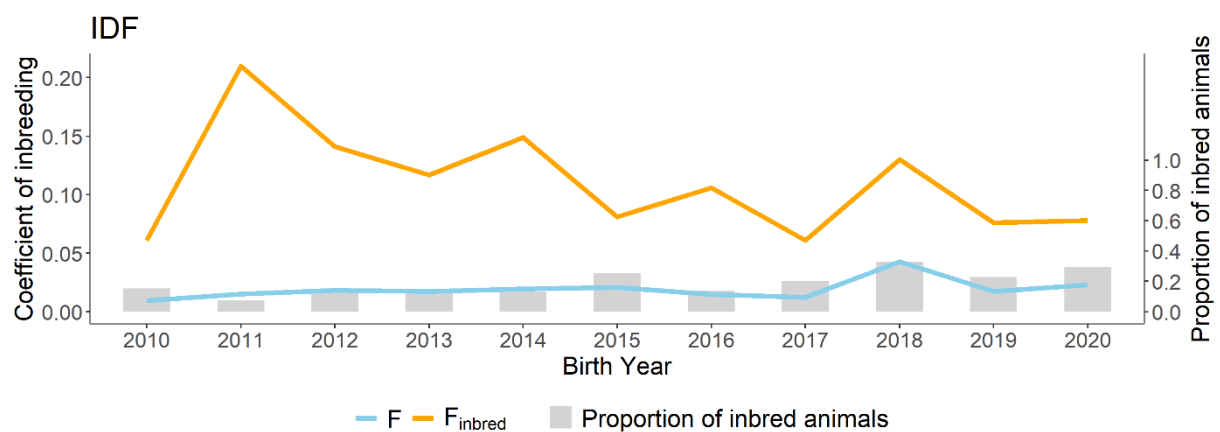

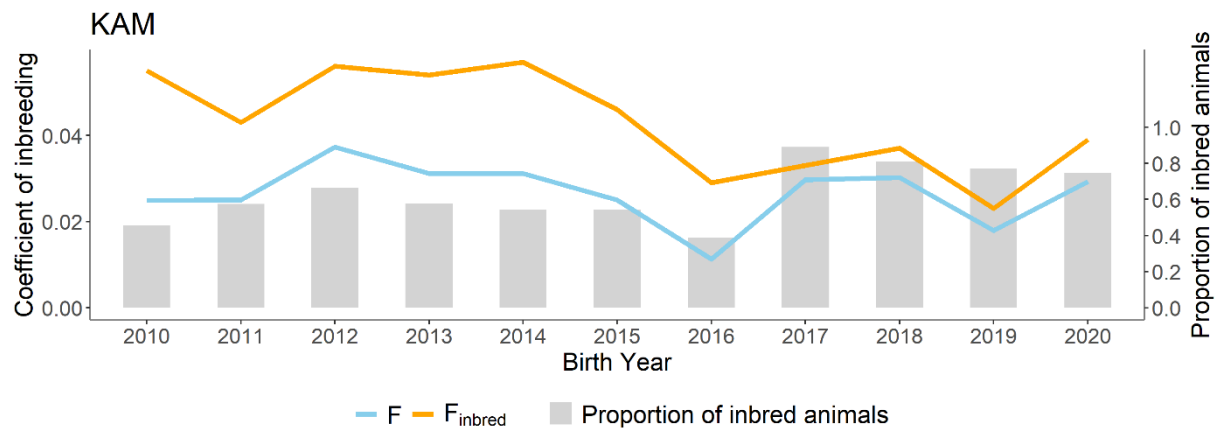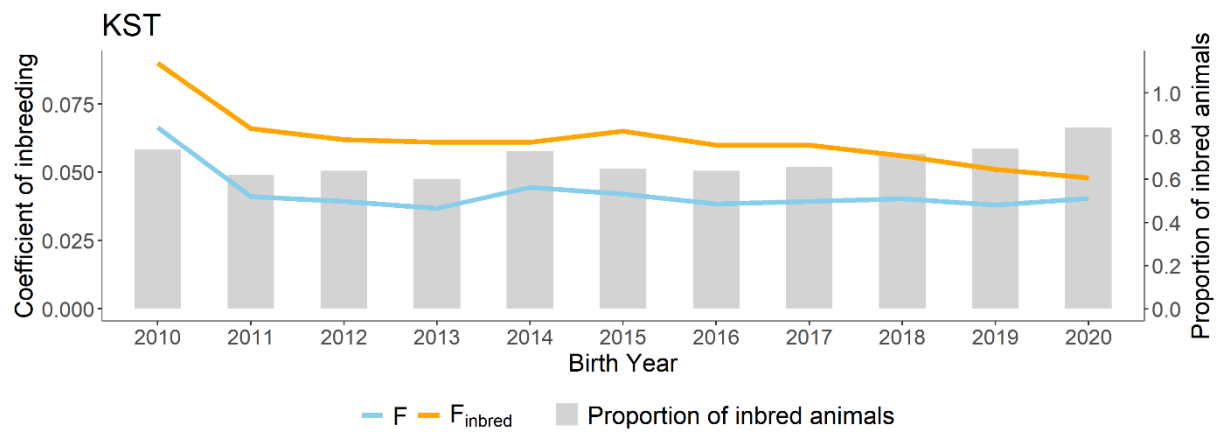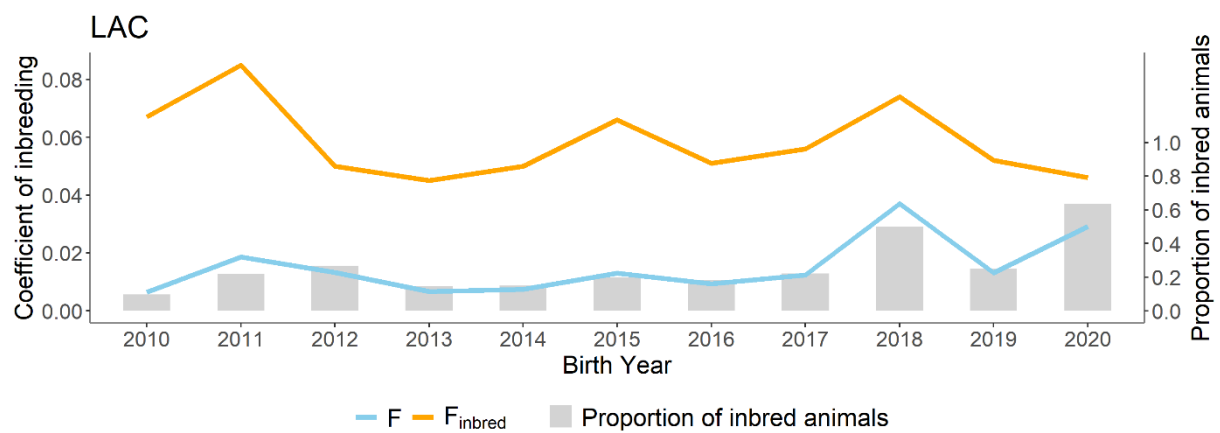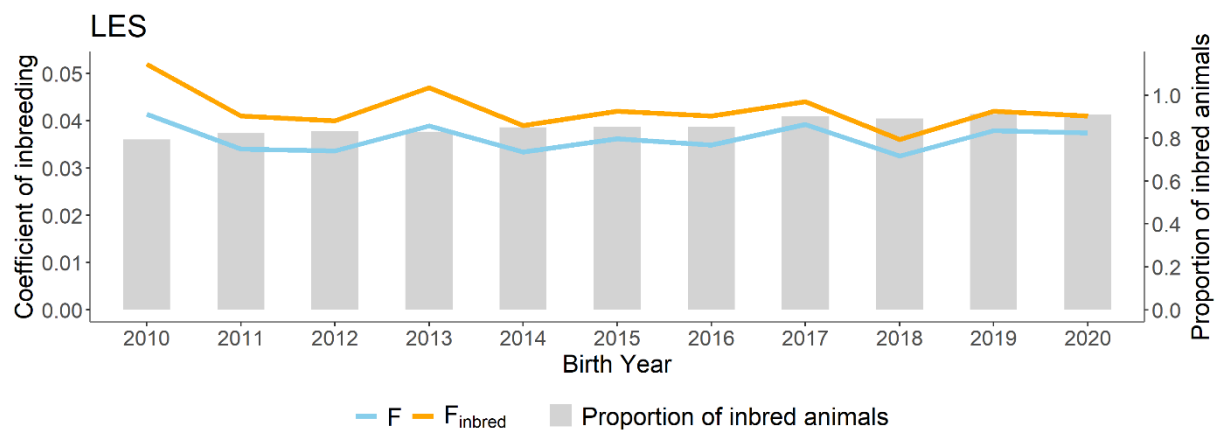

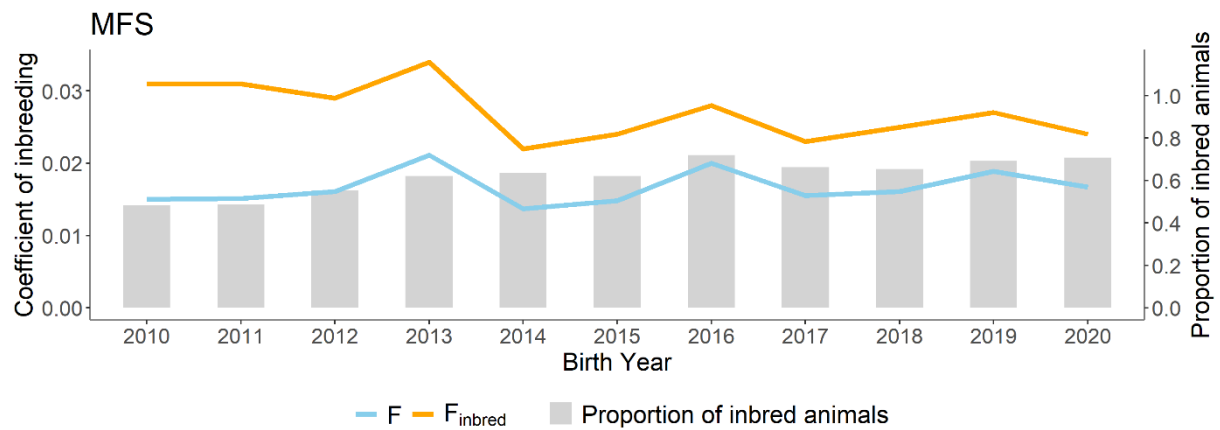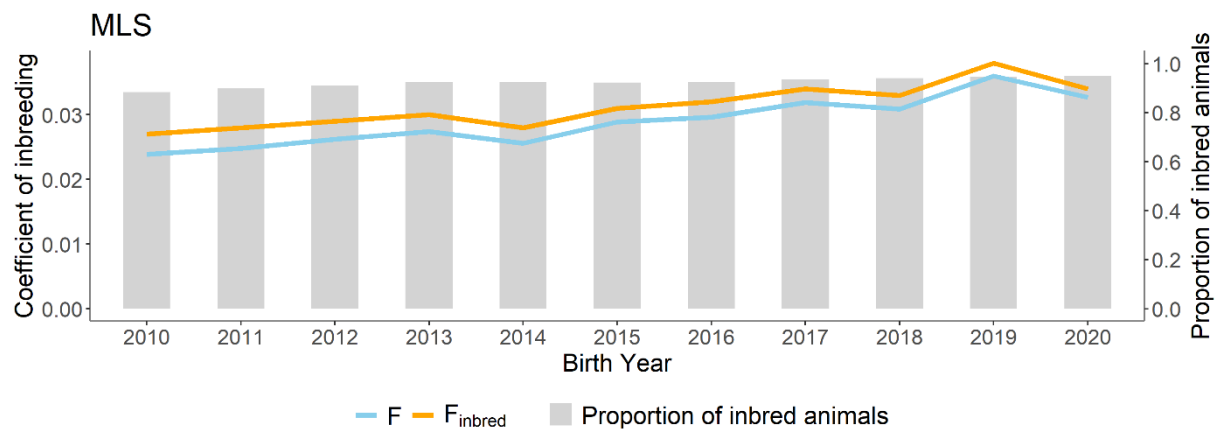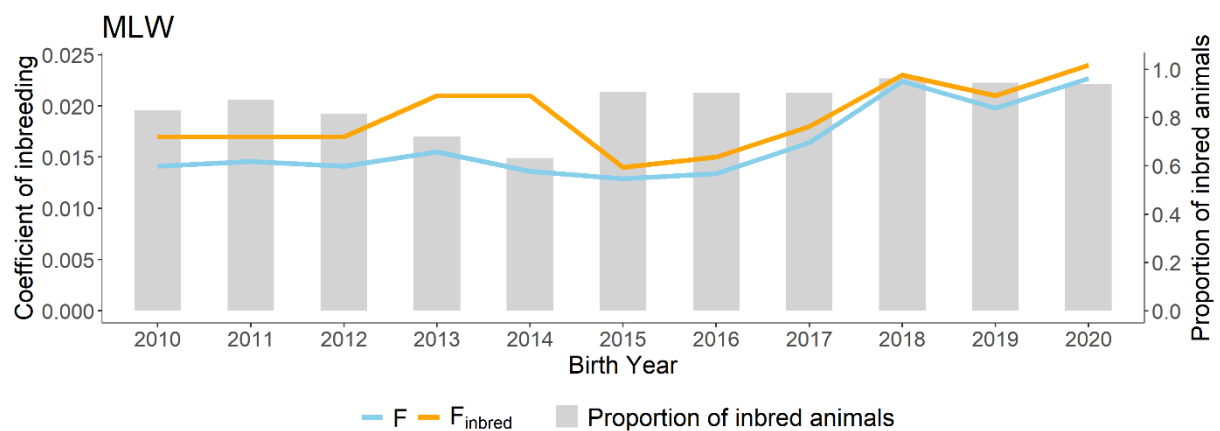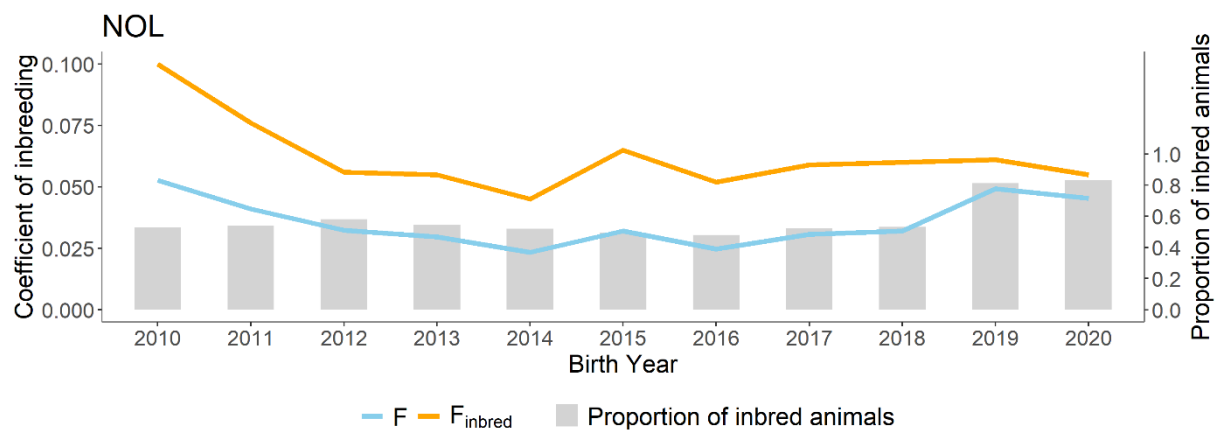

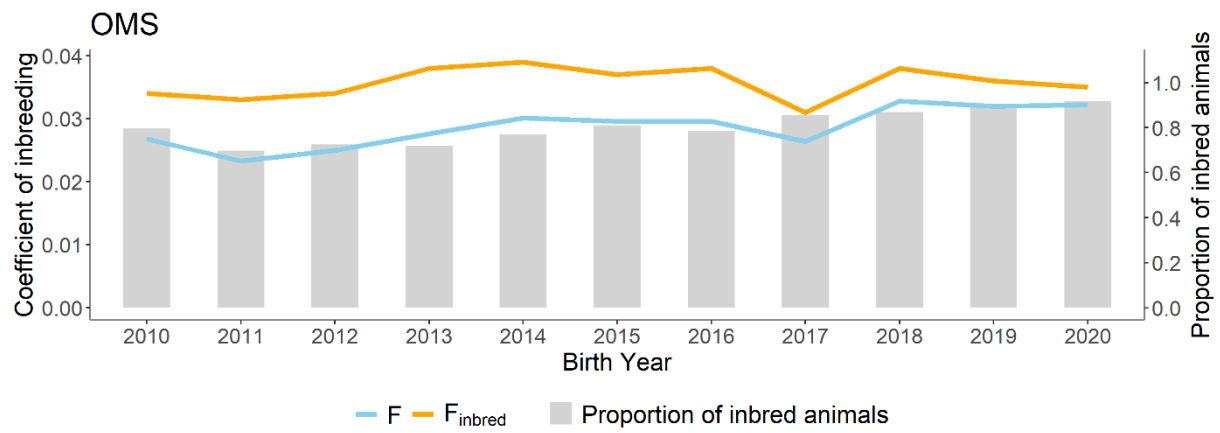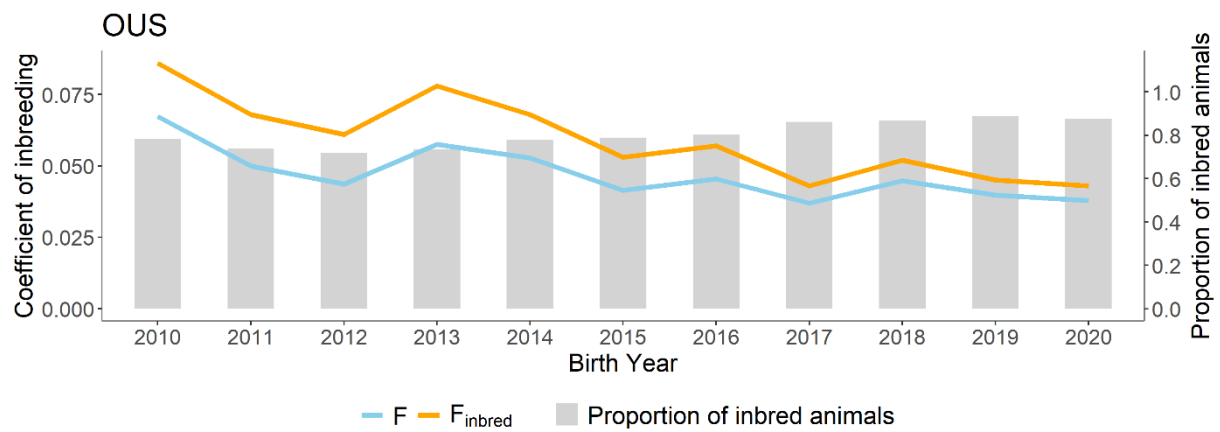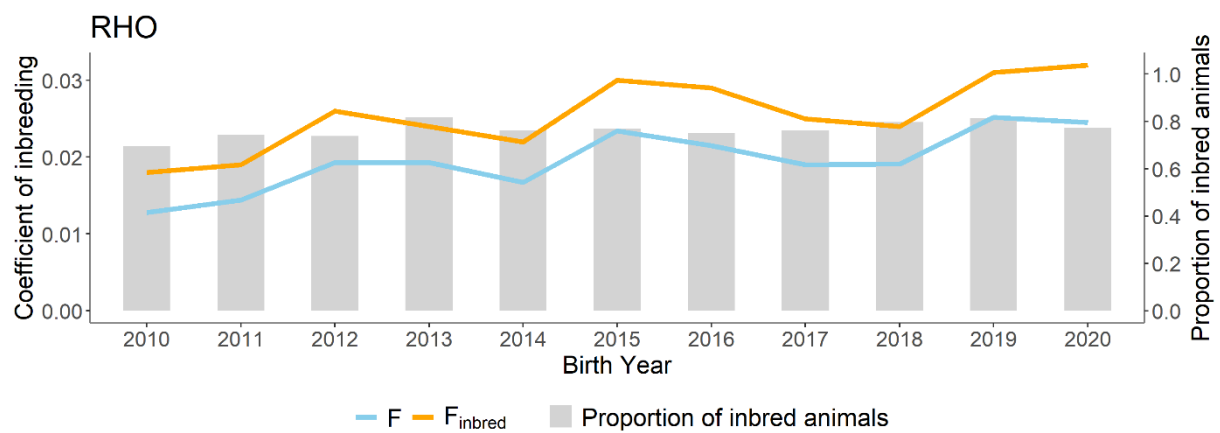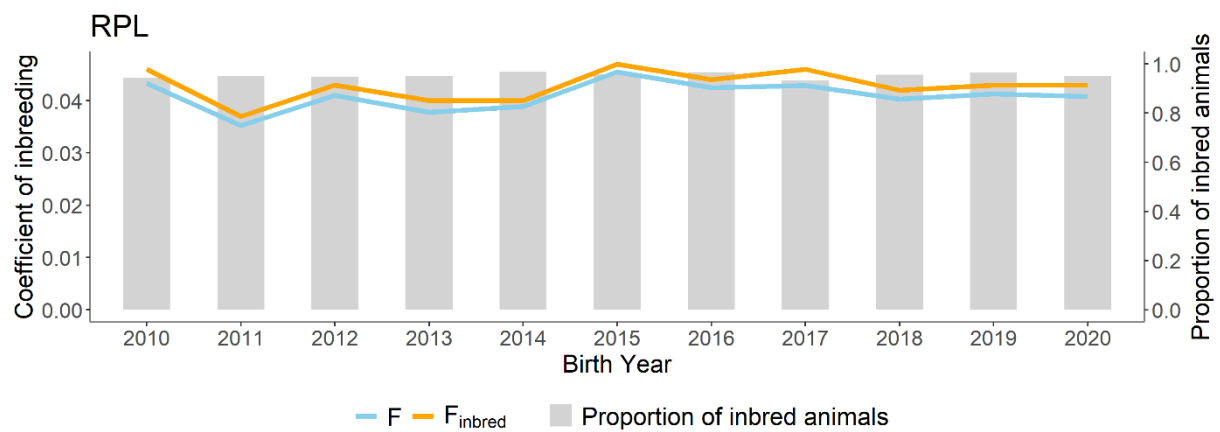

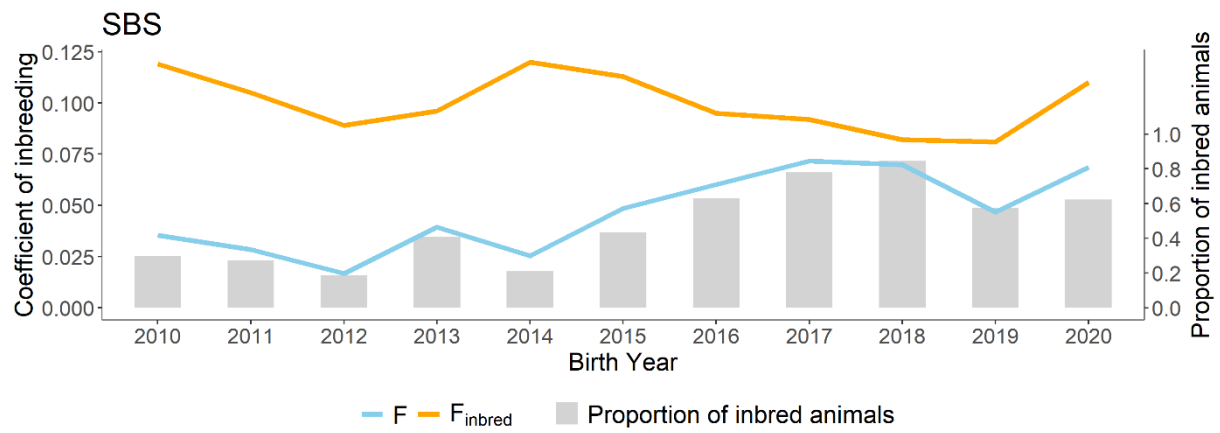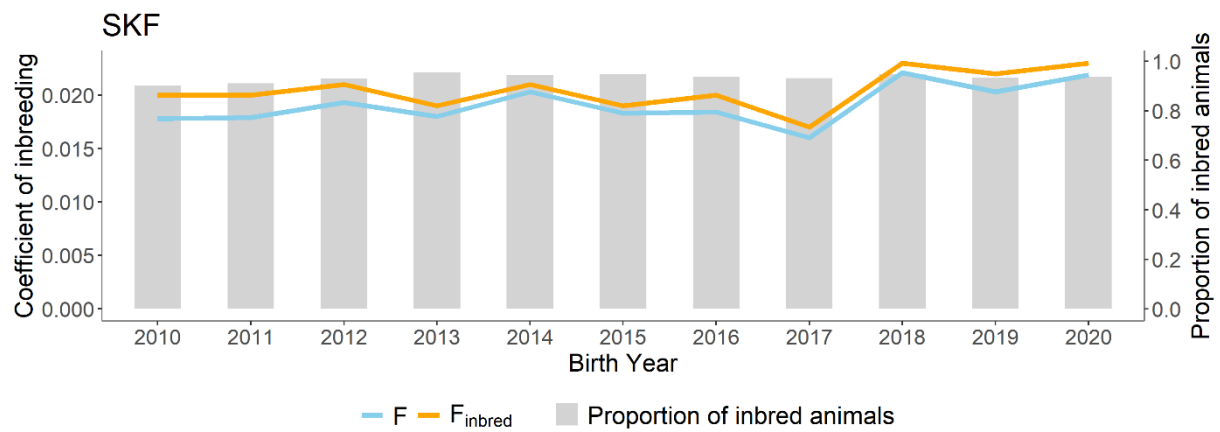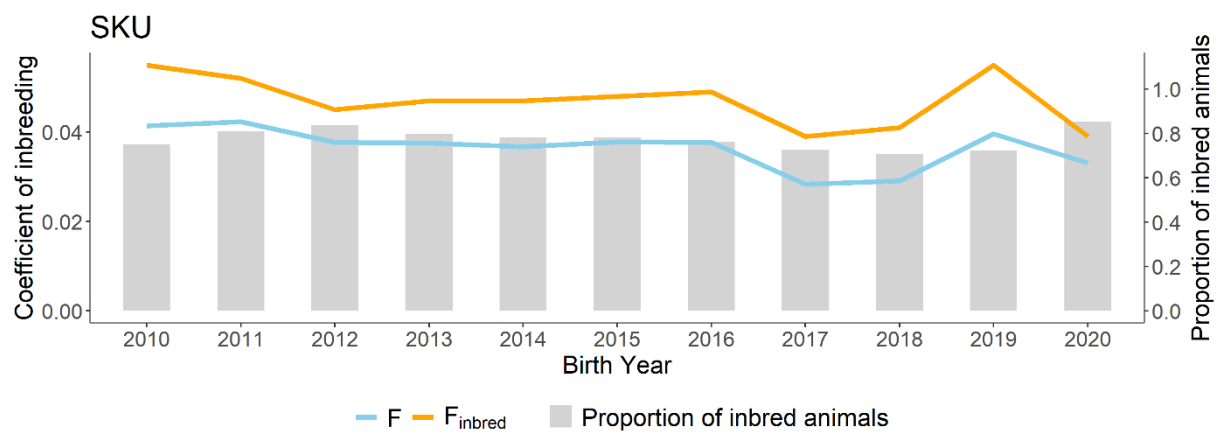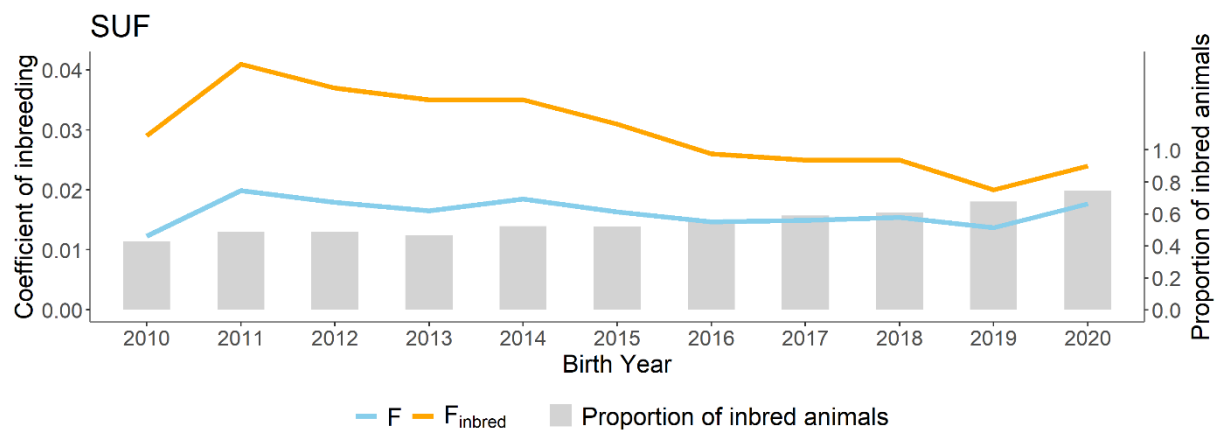

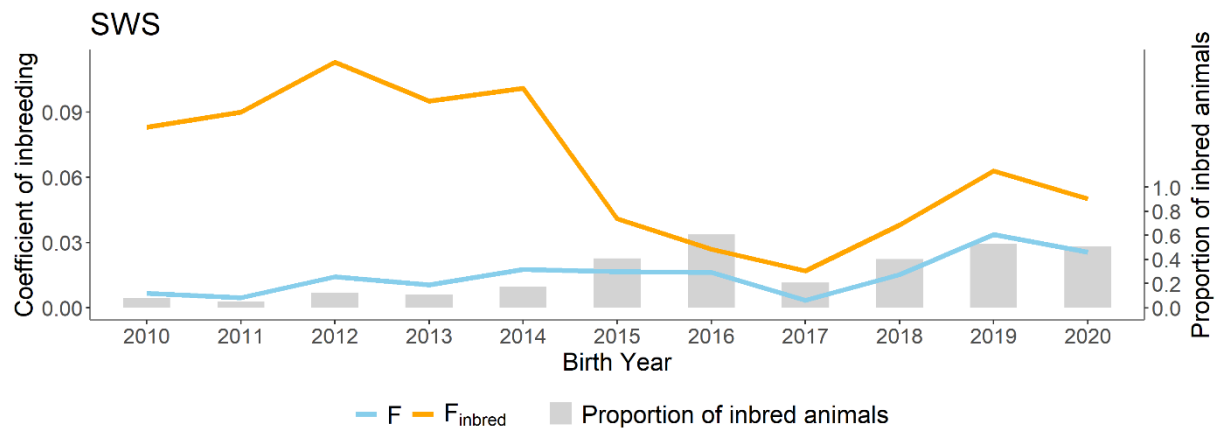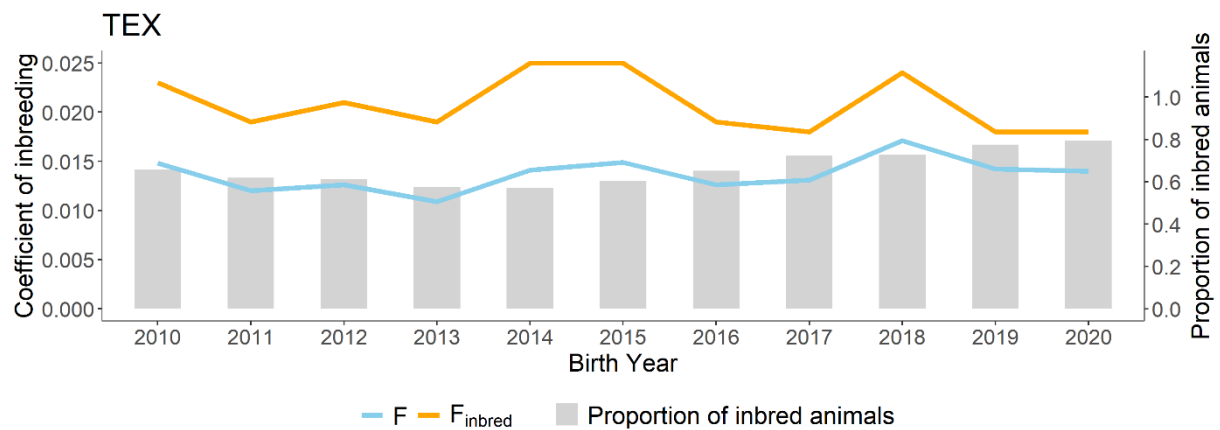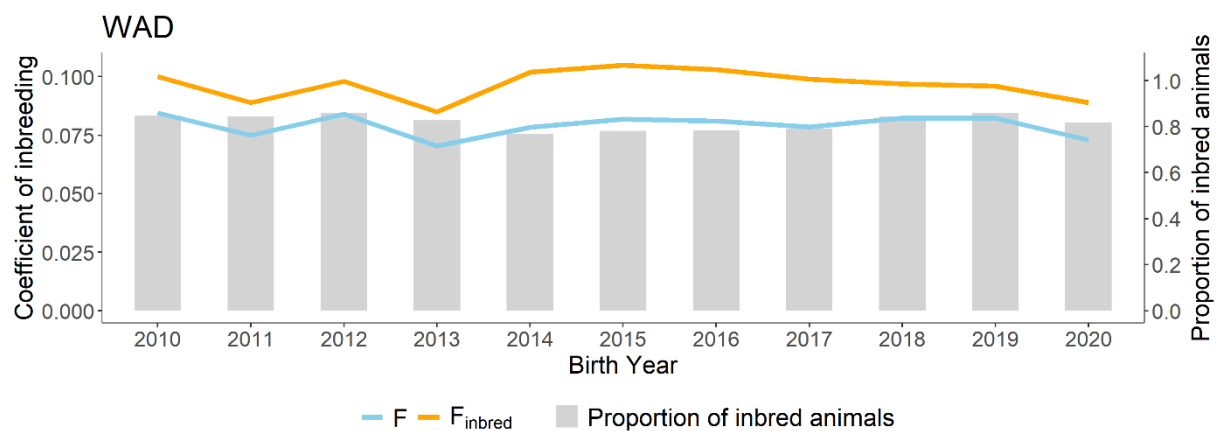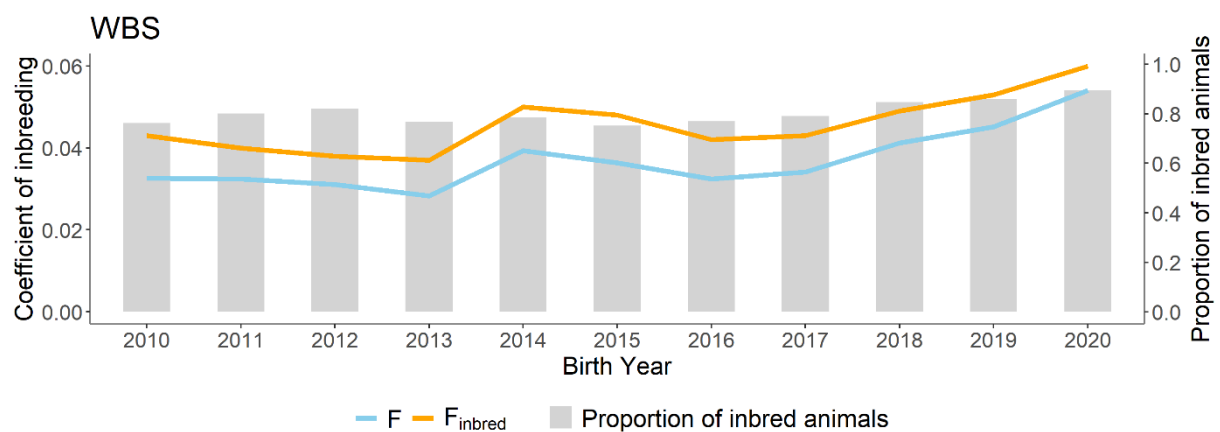



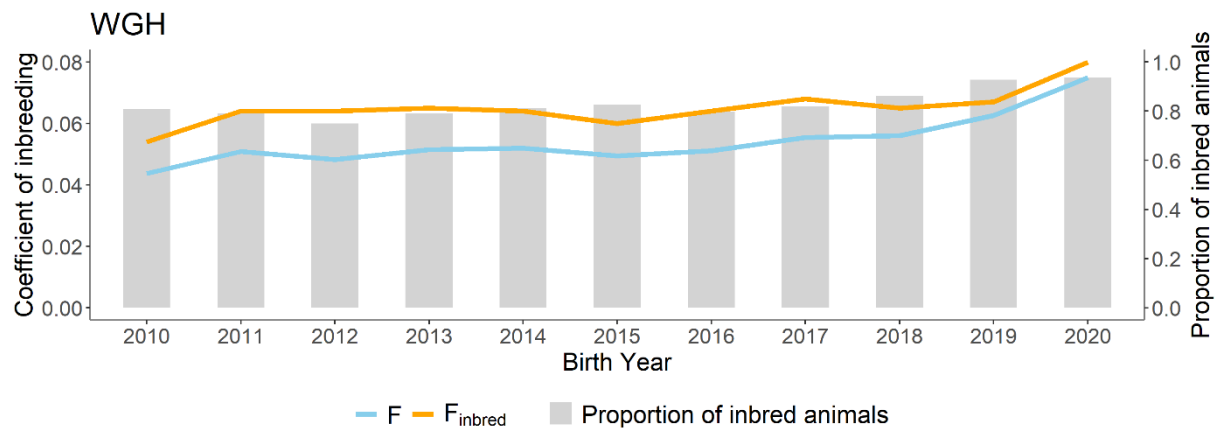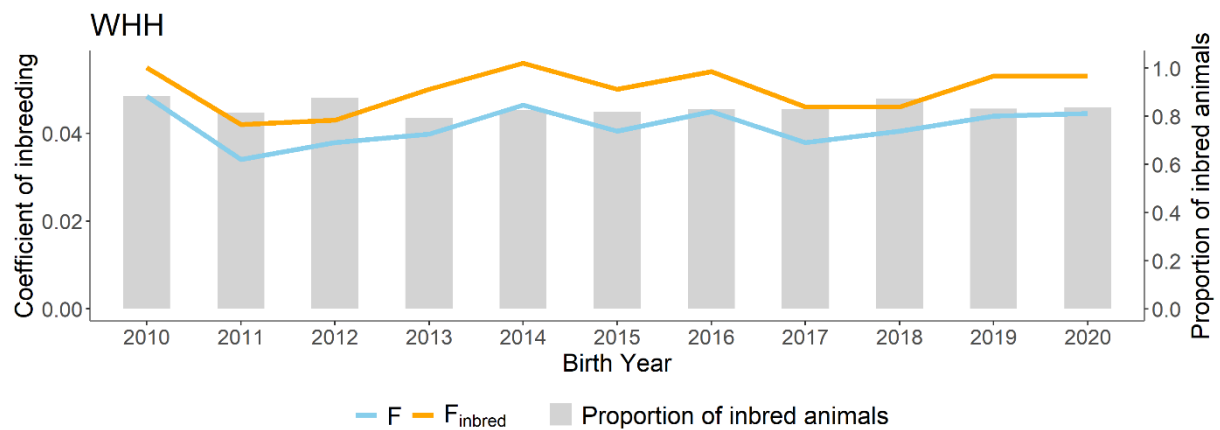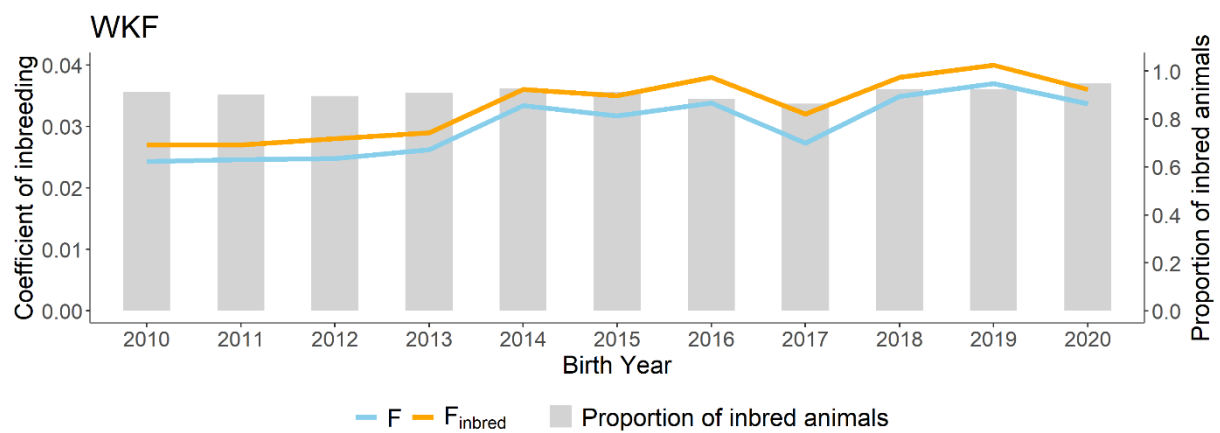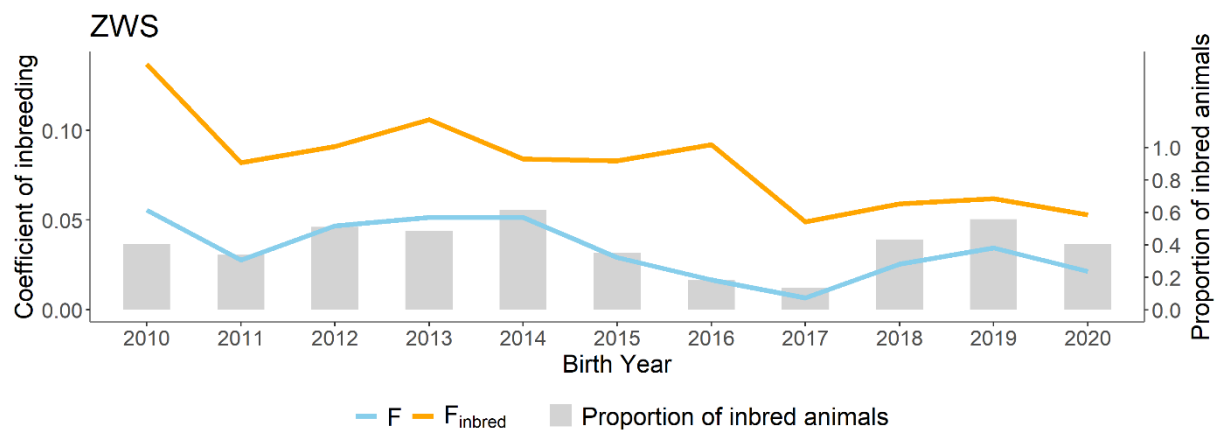

Supplement: s1 [file s1]
