# Supplementary material for: Genetic Diversity and Trends of Ancestral and New Inbreeding in German Sheep Breeds by Pedigree Data
Source: MDPI journal article supplement (doi:10.3390/ani13040623), 2023-02-10

**Figure S1.** Number of animals in the reference population ( $N_{\text{Ref}}$ ) and the number of equivalent generations (EqG) for the birth years 2010 to 2020 for each of the 35 sheep breeds in Germany.

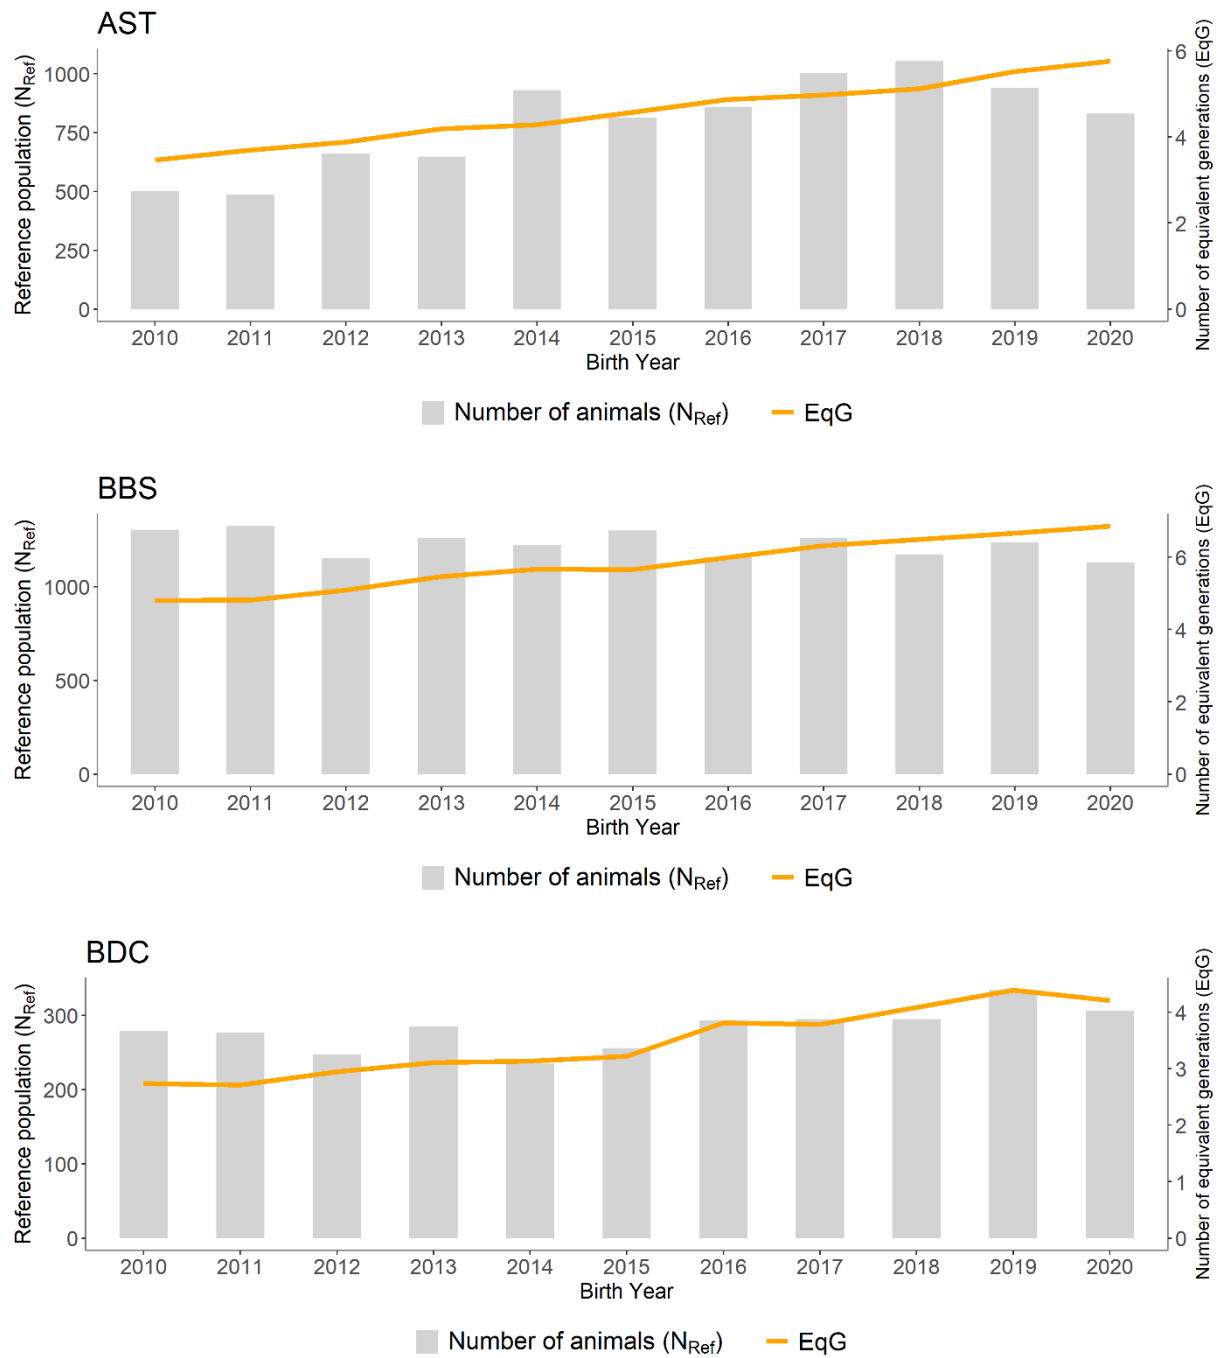

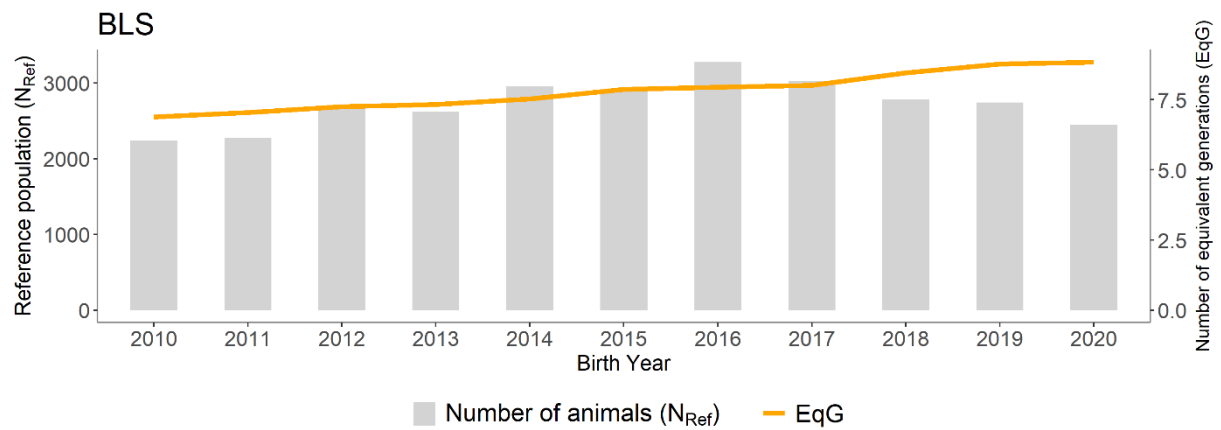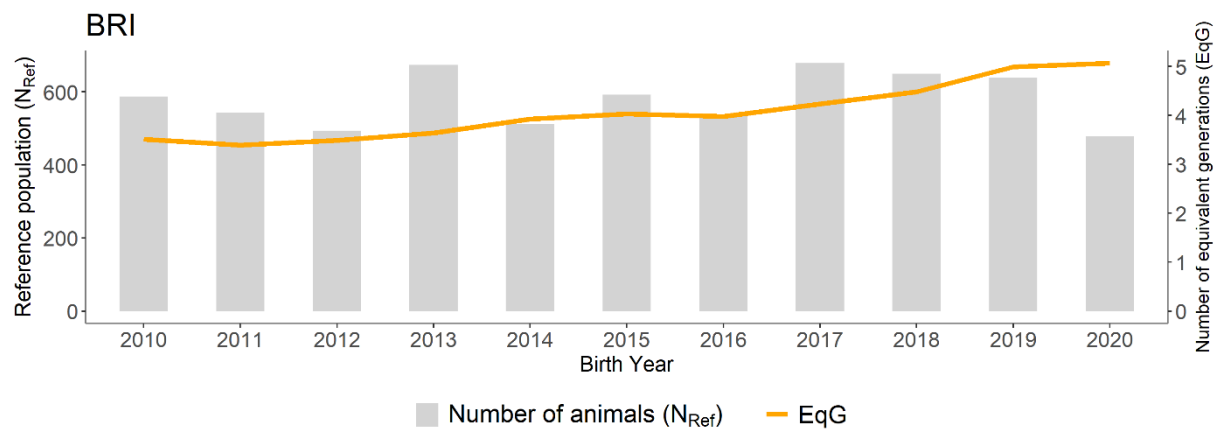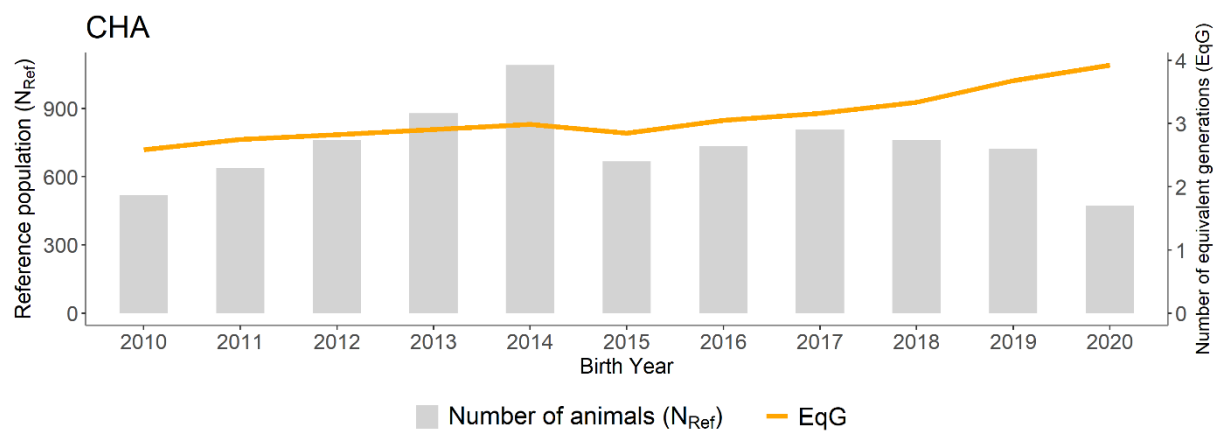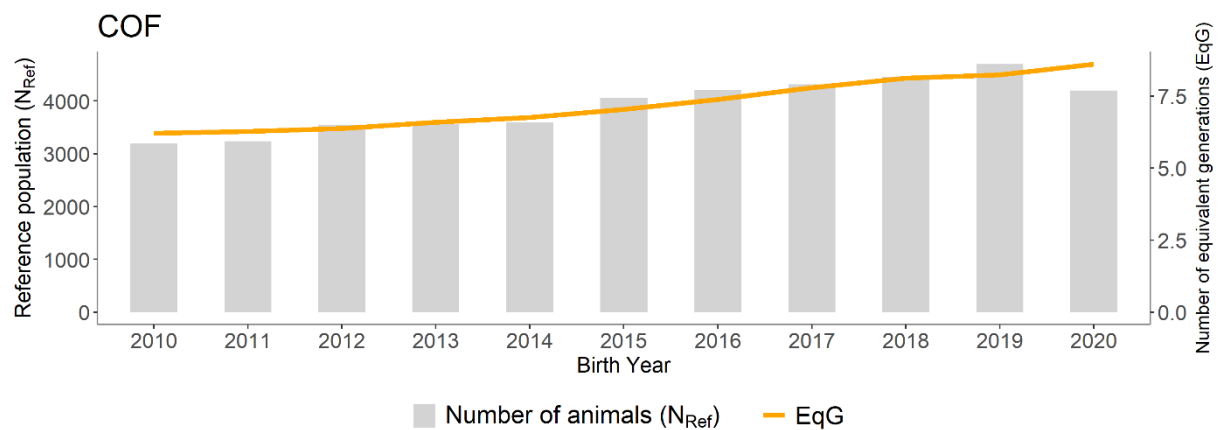

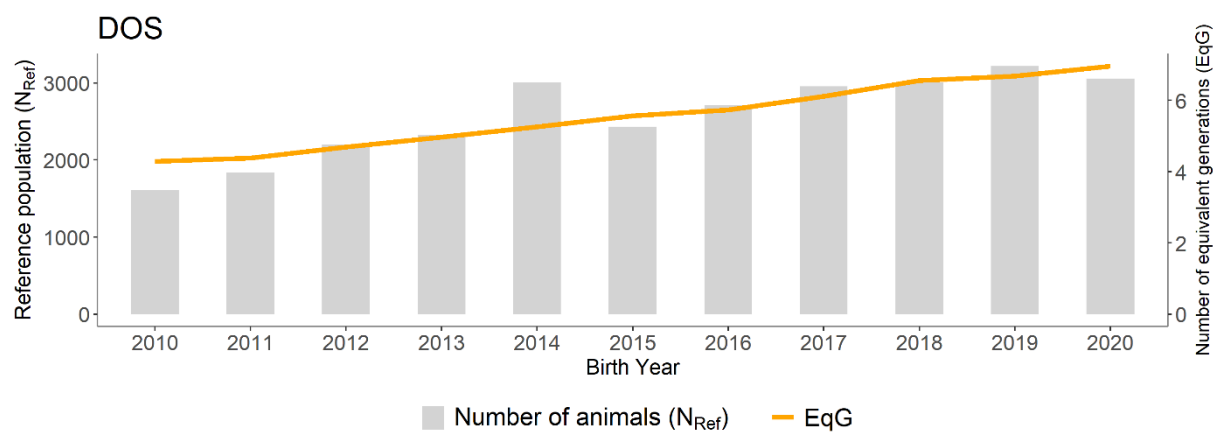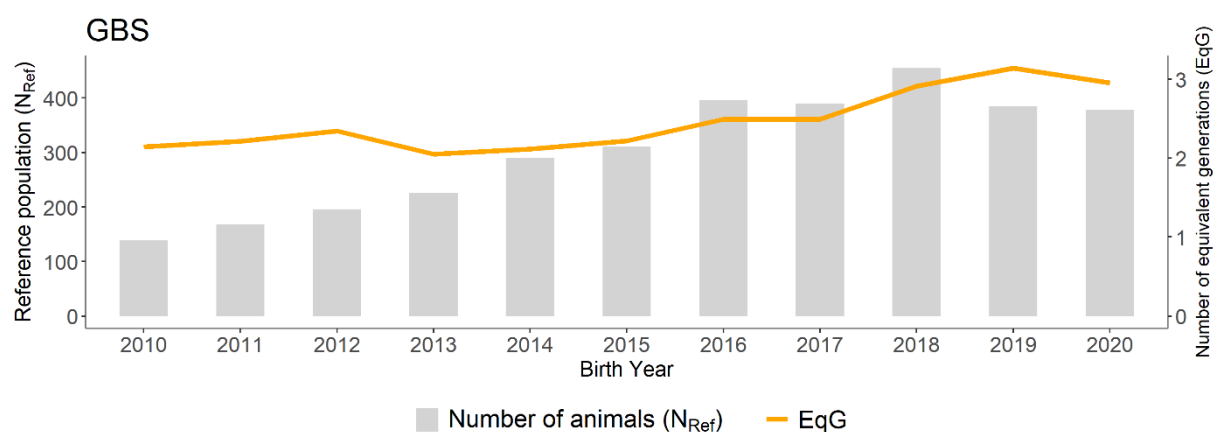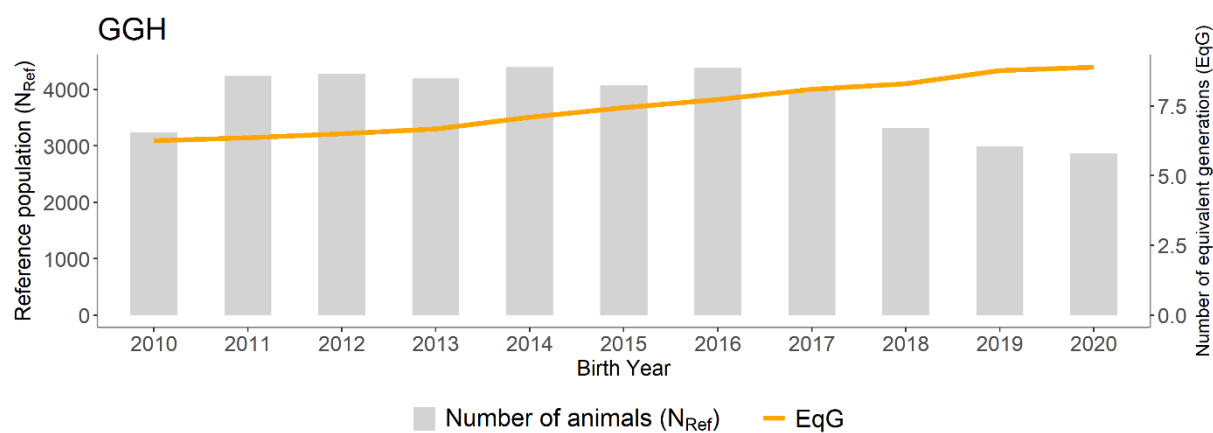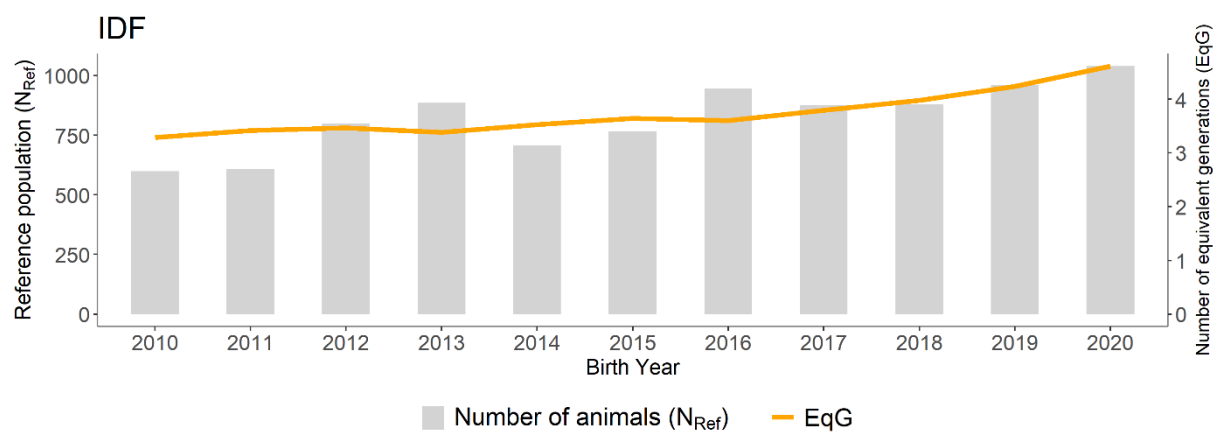

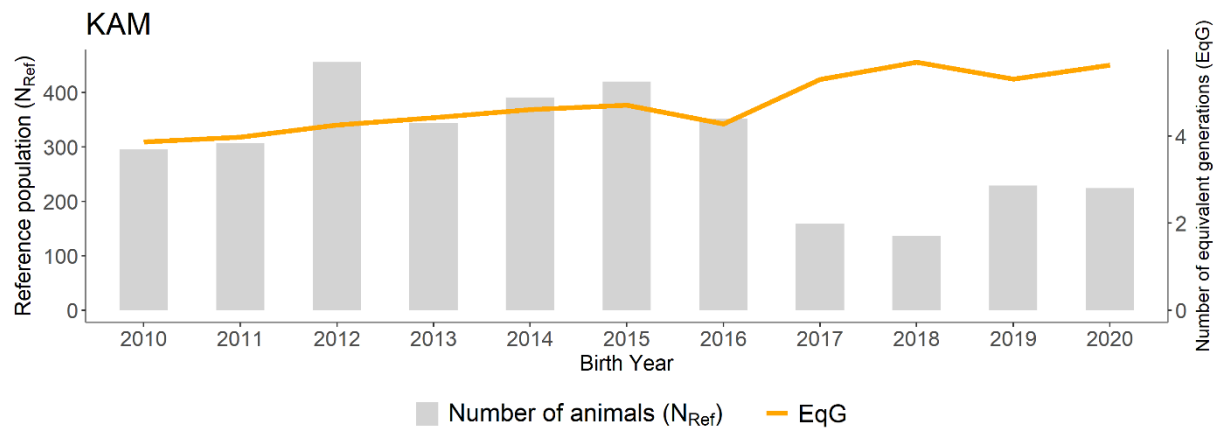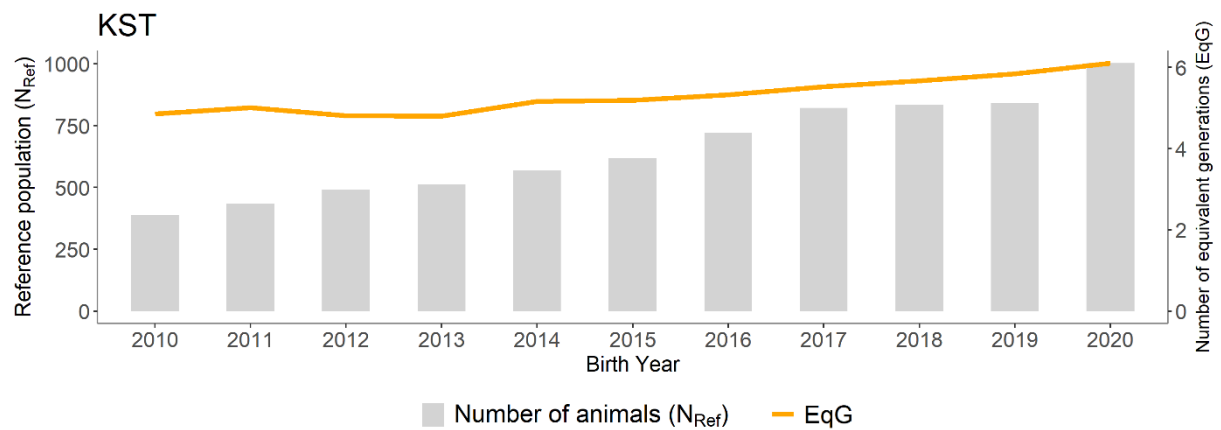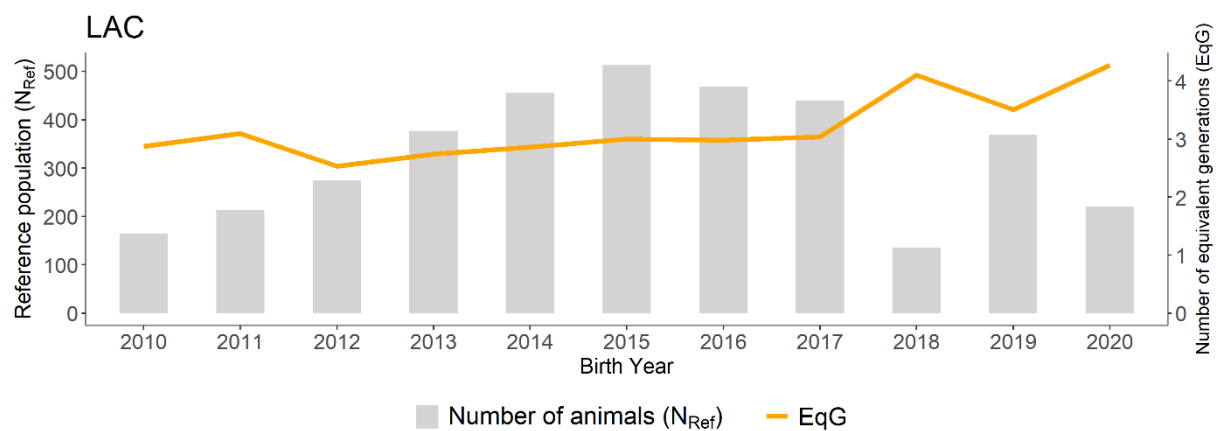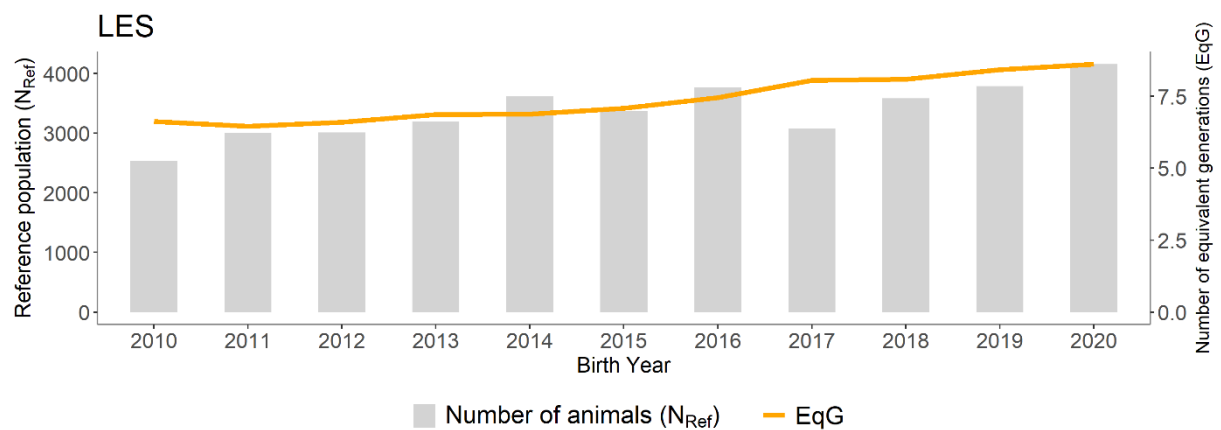

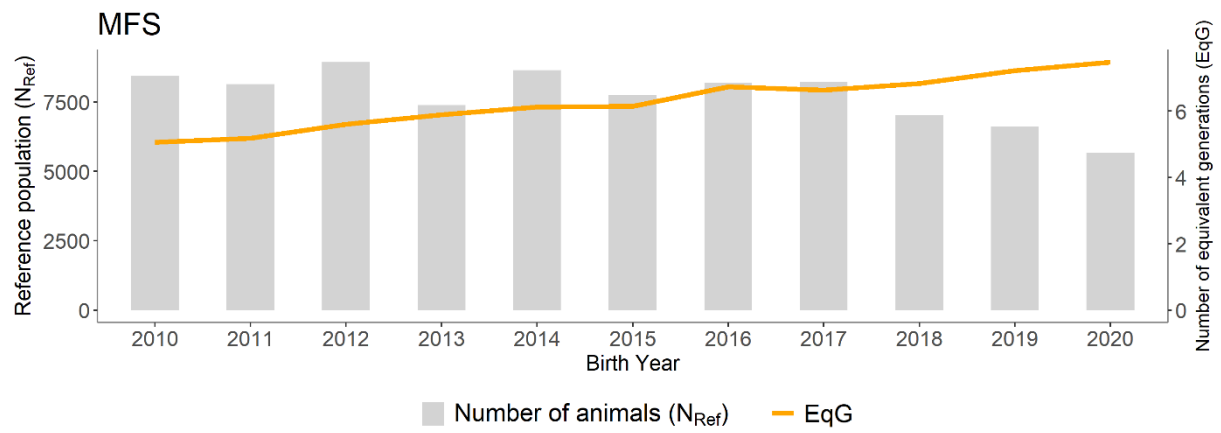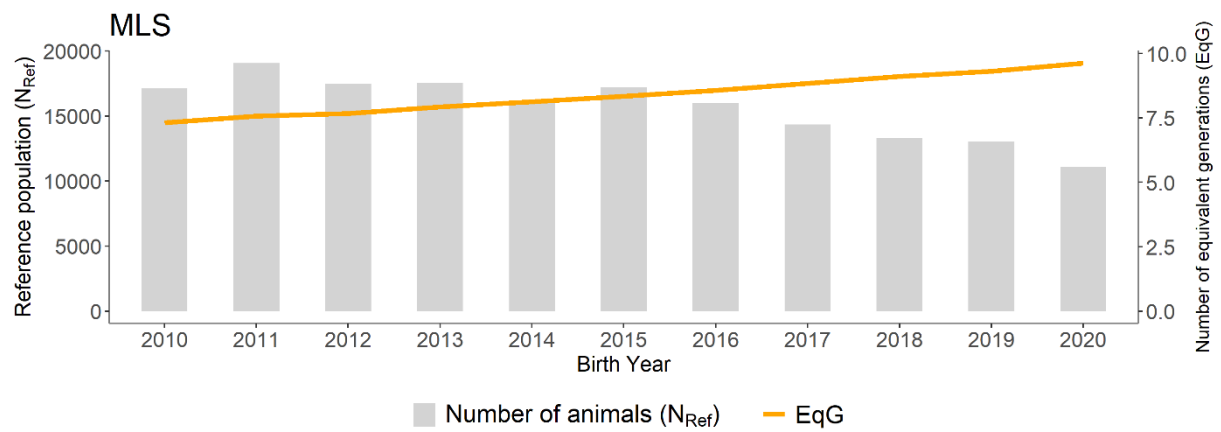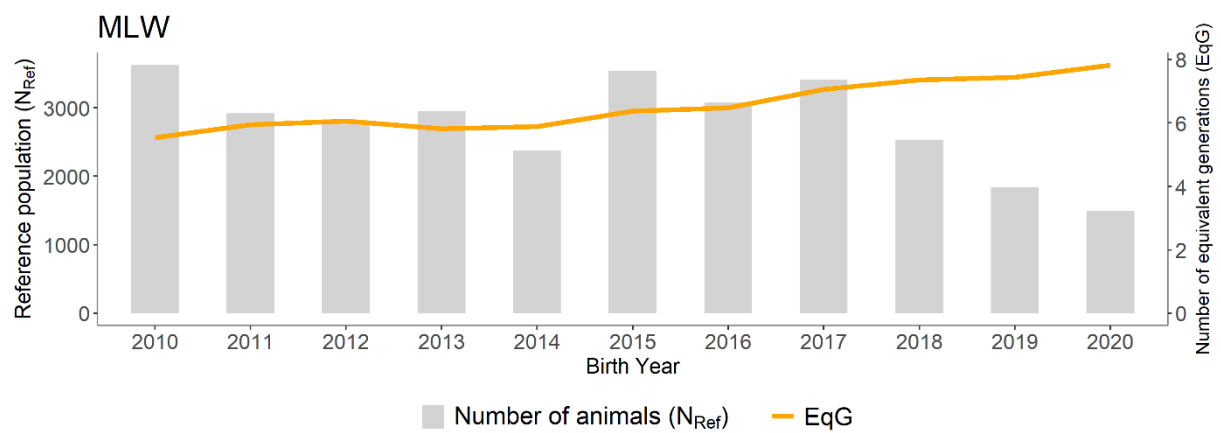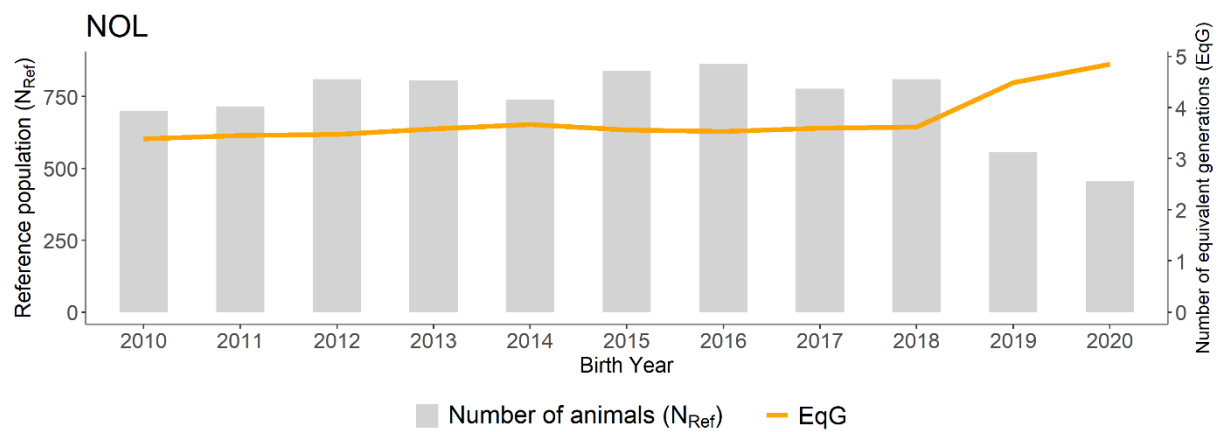

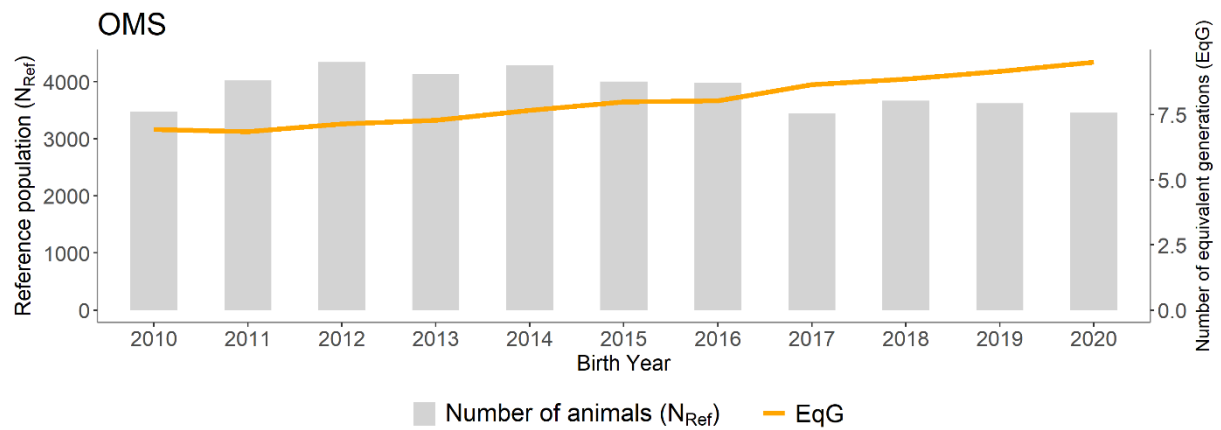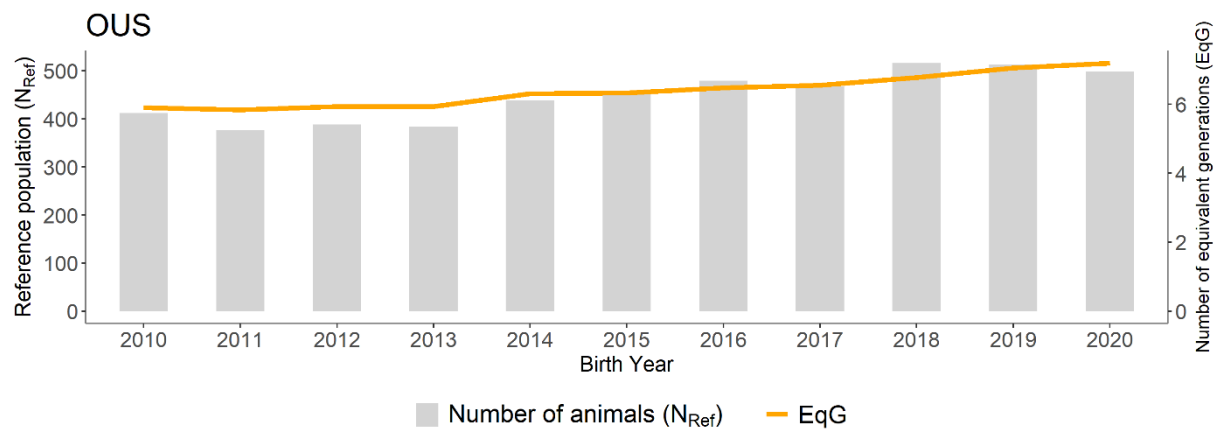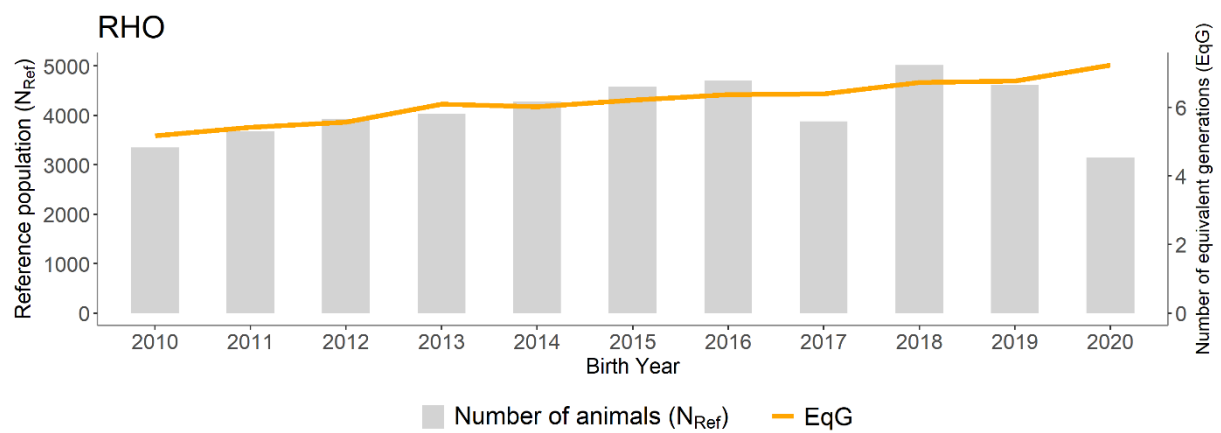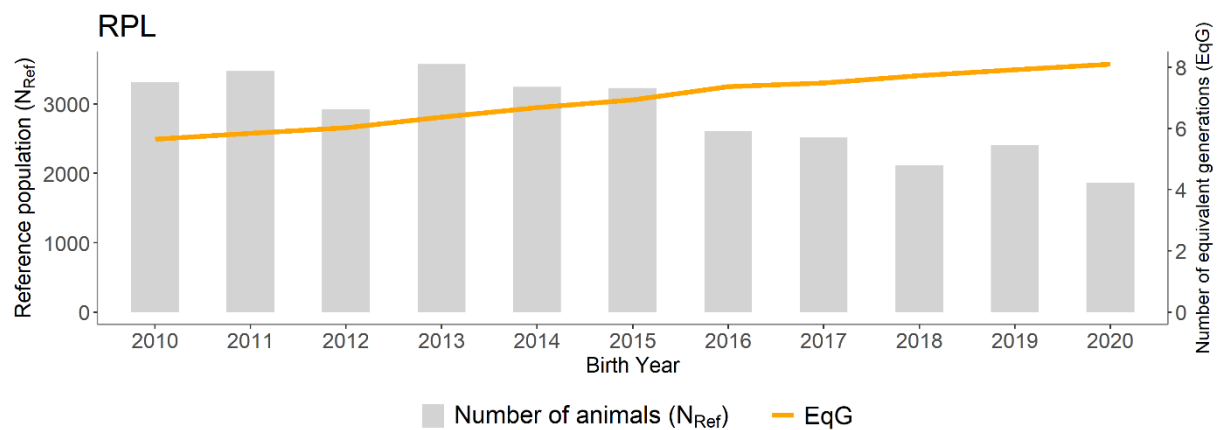

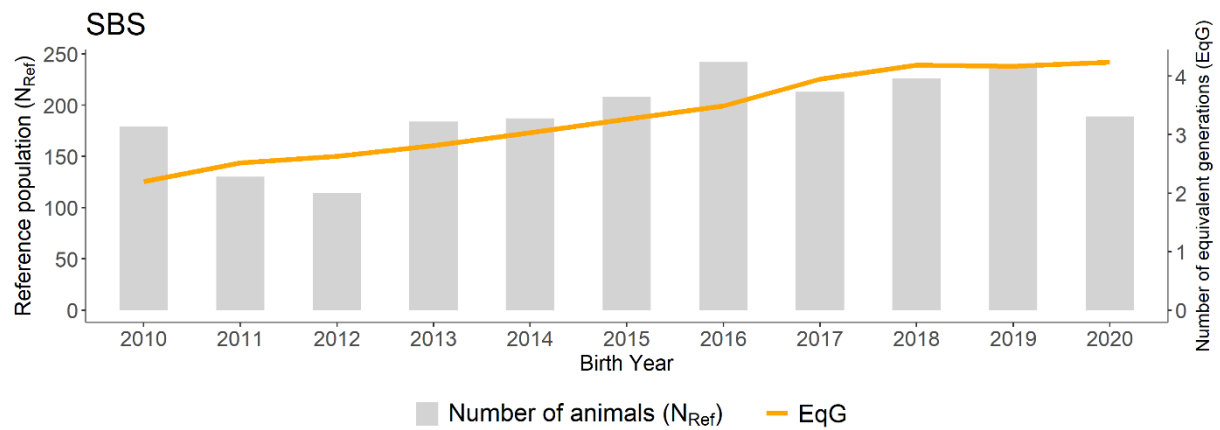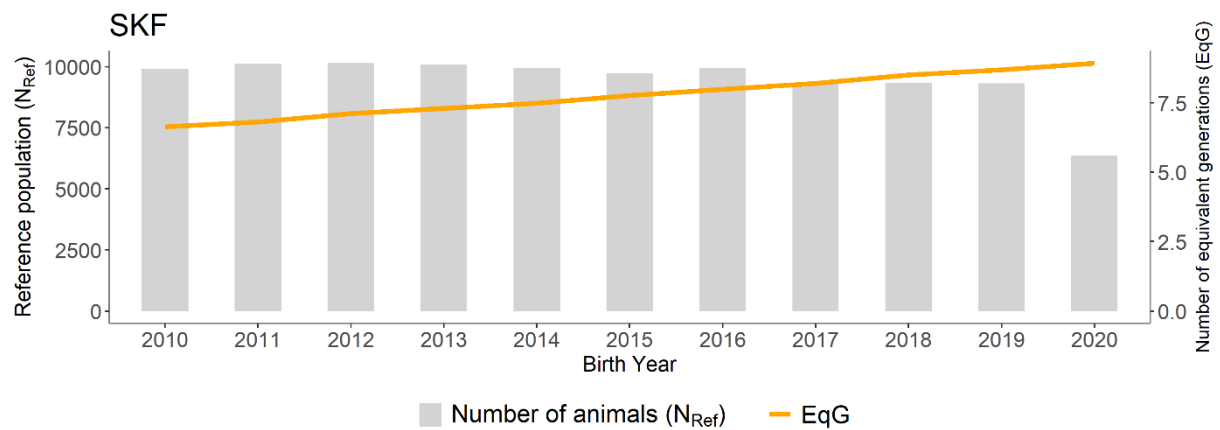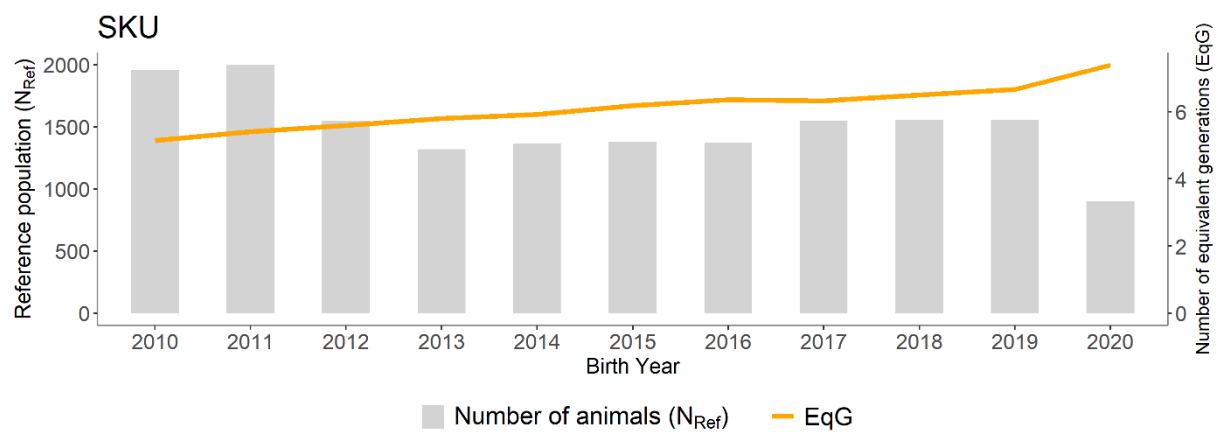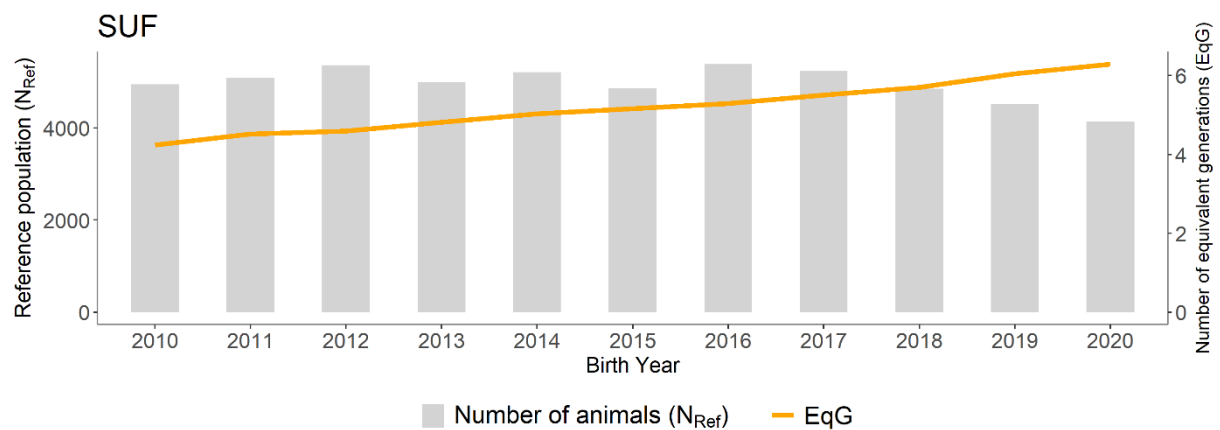

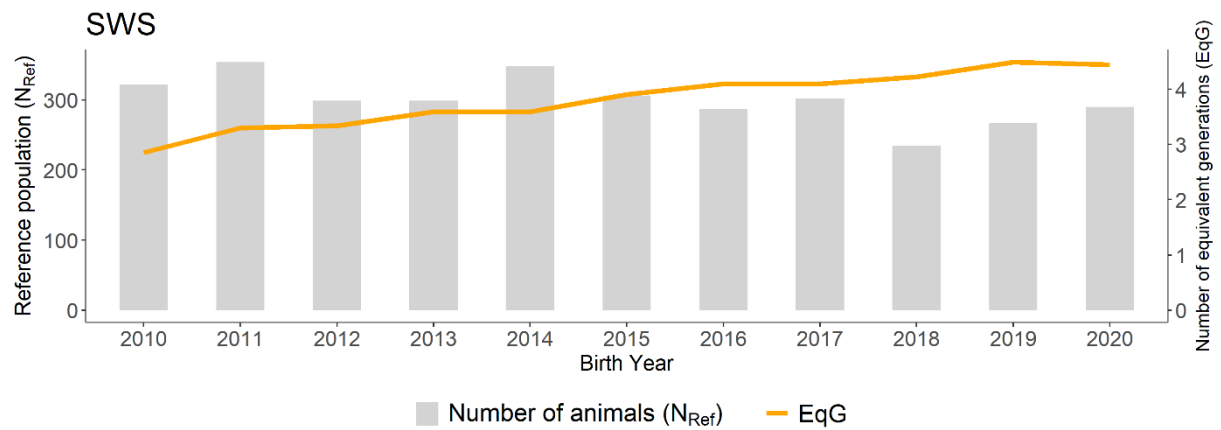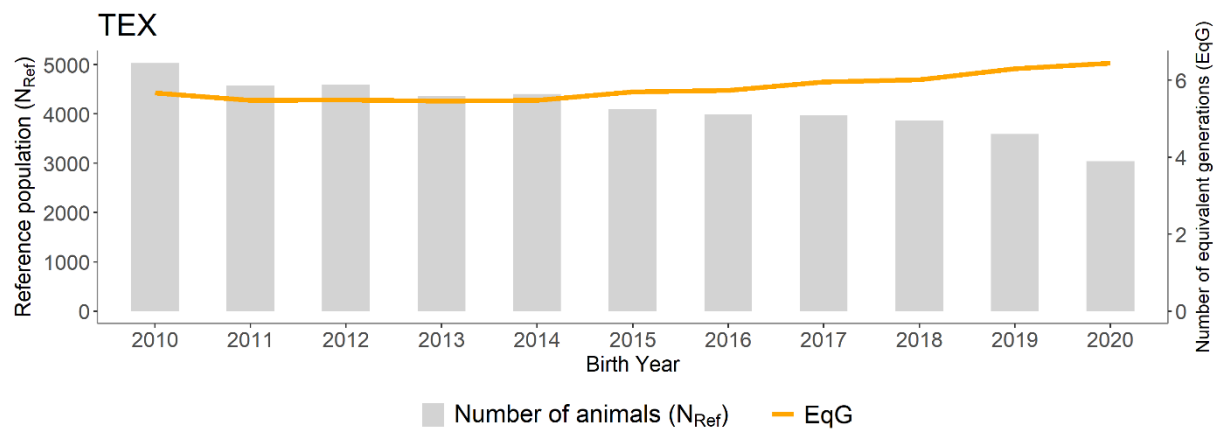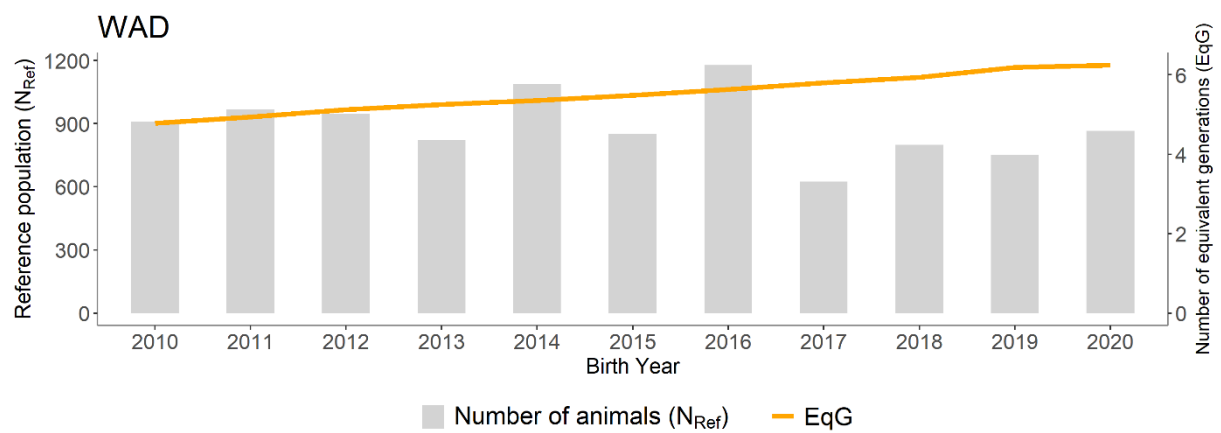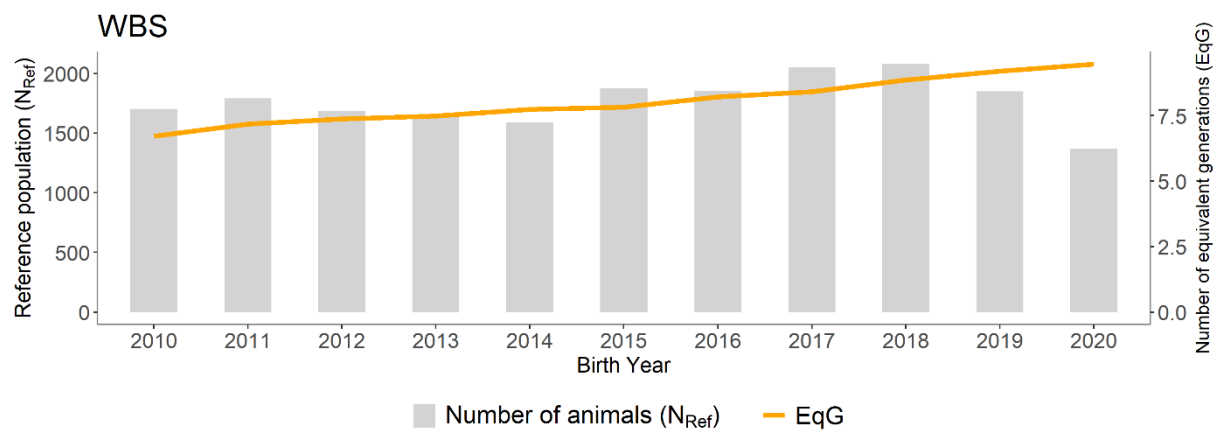



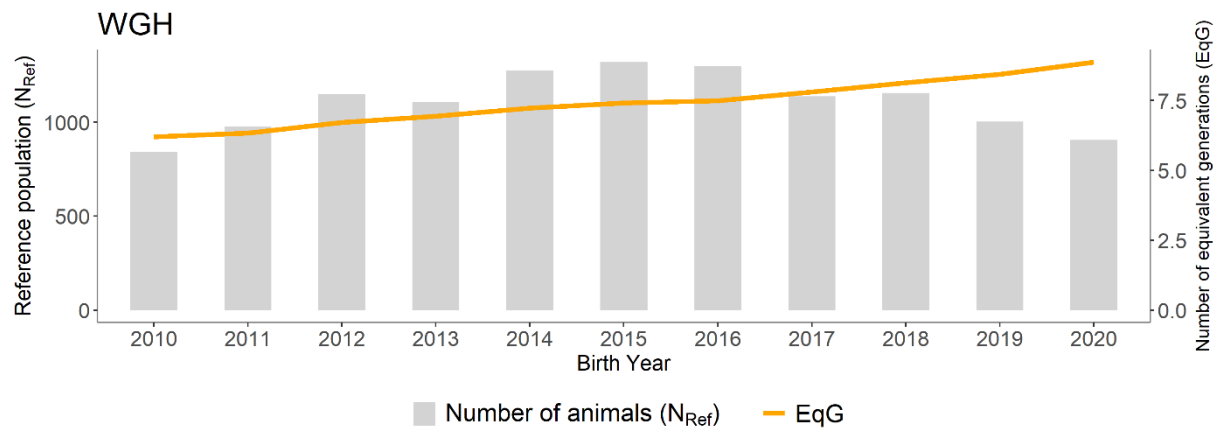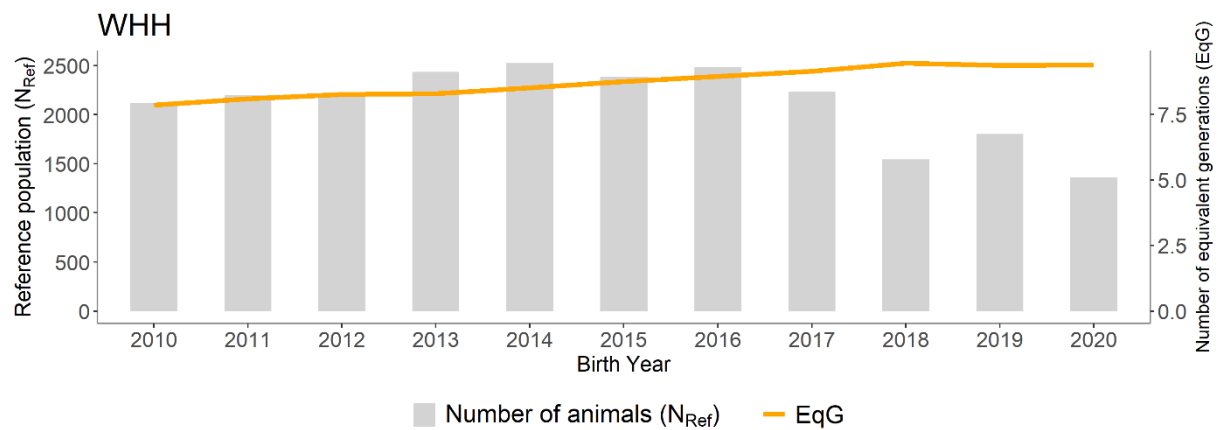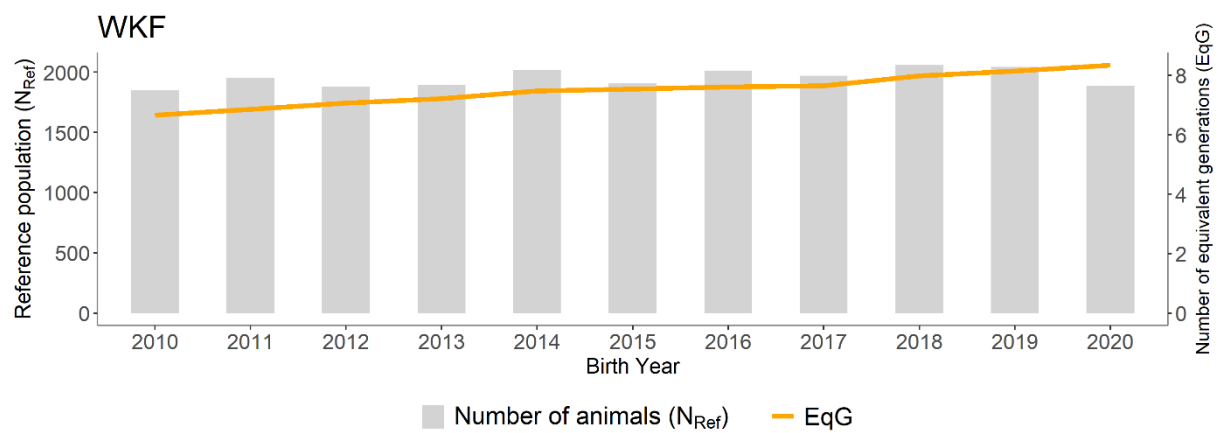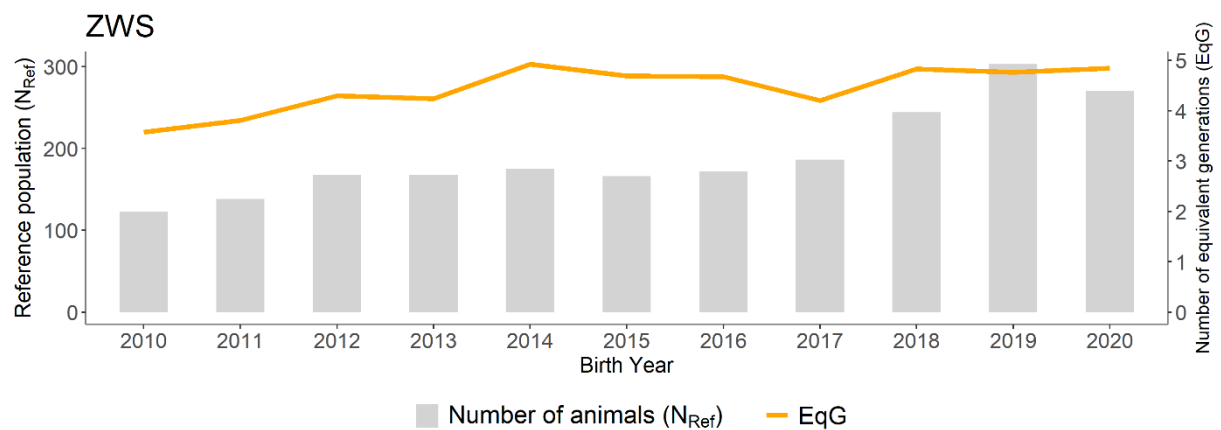

Supplement: s1 [file s1]
