# Supplementary material for: Genetic Diversity and Trends of Ancestral and New Inbreeding in German Sheep Breeds by Pedigree Data
Source: MDPI journal article supplement (doi:10.3390/ani13040623), 2023-02-10
Supplement: s1 [file s1]

**Table S1.** Pedigree analysis for measures of genetic diversity for 35 sheep breeds in Germany and ancestors explaining 30/50/70/90/95% of the gene pool (30%, 50%, 70%, 90%, 95%).

| <b>Breed</b> | $f_e/f$ | $f_a/f_e$ | $f_g/f_e$ | <b>30%</b> | <b>50%</b> | <b>70%</b> | <b>90%</b> | <b>95%</b> |
|--------------|---------|-----------|-----------|------------|------------|------------|------------|------------|
| AST          | 0.084   | 0.707     | 0.446     | 2          | 6          | 14         | 54         | 101        |
| BBS          | 0.114   | 0.601     | 0.280     | 7          | 20         | 50         | 185        | 288        |
| BDC          | 0.264   | 0.576     | 0.355     | 11         | 26         | 60         | 162        | 224        |
| BLS          | 0.065   | 0.607     | 0.260     | 5          | 14         | 34         | 121        | 267        |
| BRI          | 0.149   | 0.608     | 0.327     | 8          | 23         | 62         | 236        | 342        |
| CHA          | 0.145   | 0.539     | 0.429     | 11         | 36         | 96         | 331        | 487        |
| COF          | 0.063   | 0.432     | 0.180     | 10         | 30         | 89         | 548        | 1000       |
| DOS          | 0.030   | 0.690     | 0.434     | 3          | 13         | 43         | 193        | 368        |
| GBS          | 0.167   | 0.950     | 0.598     | 6          | 16         | 36         | 99         | 141        |
| GGH          | 0.049   | 0.383     | 0.165     | 9          | 27         | 96         | 893        | 1000       |
| IDF          | 0.202   | 0.532     | 0.351     | 12         | 26         | 53         | 134        | 190        |
| KAM          | 0.166   | 0.756     | 0.387     | 5          | 12         | 24         | 69         | 98         |
| KST          | 0.133   | 0.555     | 0.341     | 4          | 10         | 19         | 61         | 115        |
| LAC          | 0.132   | 0.627     | 0.411     | 5          | 12         | 29         | 129        | 197        |
| LES          | 0.077   | 0.540     | 0.237     | 8          | 19         | 42         | 140        | 337        |
| MFS          | 0.038   | 0.281     | 0.131     | 12         | 37         | 146        | 1000       | 1000       |
| MLS          | 0.031   | 0.390     | 0.173     | 9          | 27         | 96         | 558        | 1000       |
| MLW          | 0.056   | 0.558     | 0.245     | 9          | 19         | 43         | 132        | 281        |
| NOL          | 0.057   | 0.878     | 0.514     | 5          | 16         | 54         | 245        | 396        |
| OMS          | 0.096   | 0.405     | 0.166     | 14         | 35         | 91         | 403        | 769        |
| OUS          | 0.091   | 0.770     | 0.442     | 6          | 16         | 37         | 137        | 224        |
| RHO          | 0.051   | 0.662     | 0.270     | 17         | 48         | 120        | 657        | 1000       |
| RPL          | 0.080   | 0.621     | 0.305     | 6          | 17         | 43         | 146        | 244        |
| SBS          | 0.158   | 0.600     | 0.420     | 2          | 5          | 12         | 48         | 69         |
| SKF          | 0.041   | 0.560     | 0.265     | 14         | 40         | 107        | 417        | 834        |
| SKU          | 0.109   | 0.544     | 0.260     | 12         | 31         | 76         | 314        | 581        |
| SUF          | 0.112   | 0.472     | 0.263     | 33         | 96         | 244        | 799        | 1000       |
| SWS          | 0.296   | 0.458     | 0.303     | 4          | 12         | 30         | 70         | 95         |
| TEX          | 0.114   | 0.564     | 0.325     | 26         | 71         | 161        | 443        | 680        |
| WAD          | 0.086   | 0.727     | 0.374     | 4          | 10         | 23         | 85         | 156        |
| WBS          | 0.082   | 0.460     | 0.177     | 5          | 14         | 38         | 237        | 446        |
| WGH          | 0.073   | 0.500     | 0.222     | 3          | 8          | 21         | 113        | 253        |
| WHH          | 0.043   | 0.614     | 0.218     | 5          | 13         | 31         | 193        | 478        |
| WKF          | 0.130   | 0.509     | 0.234     | 9          | 20         | 39         | 107        | 175        |
| ZWS          | 0.254   | 0.381     | 0.201     | 5          | 13         | 38         | 127        | 180        |

**Table S2.** Amount of genetic diversity accounting for the loss of genetic diversity resulting from genetic drift (*GD*) or unequal contribution of founders (*GD\**), losses due to drift in % (*Loss<sub>drift</sub>*), losses due to unequal contributions of founders in % (*Loss<sub>founder</sub>*) as relative effects for each of the 35 sheep breeds.

| <b>Breed</b> | <b><i>GD</i></b> | <b><i>GD*</i></b> | <b>1- <i>GD</i></b> | <b><i>GD*-GD</i></b> | <b>1-<i>GD*</i></b> | <b><i>Loss<sub>drift</sub></i></b> | <b><i>Loss<sub>founder</sub></i></b> |
|--------------|------------------|-------------------|---------------------|----------------------|---------------------|------------------------------------|--------------------------------------|
| AST          | 0.953            | 0.979             | 0.047               | 0.026                | 0.021               | 55.440                             | 44.560                               |
| BBS          | 0.980            | 0.994             | 0.020               | 0.014                | 0.006               | 72.010                             | 27.990                               |
| BDC          | 0.989            | 0.996             | 0.011               | 0.007                | 0.004               | 64.490                             | 35.510                               |
| BLS          | 0.972            | 0.993             | 0.028               | 0.021                | 0.007               | 73.980                             | 26.020                               |
| BRI          | 0.985            | 0.995             | 0.015               | 0.010                | 0.005               | 67.270                             | 32.730                               |
| CHA          | 0.992            | 0.997             | 0.008               | 0.004                | 0.003               | 57.080                             | 42.920                               |
| COF          | 0.984            | 0.997             | 0.016               | 0.013                | 0.003               | 82.010                             | 17.990                               |
| DOS          | 0.972            | 0.988             | 0.028               | 0.016                | 0.012               | 56.590                             | 43.410                               |
| GBS          | 0.982            | 0.989             | 0.018               | 0.007                | 0.011               | 40.200                             | 59.800                               |
| GGH          | 0.981            | 0.997             | 0.019               | 0.016                | 0.003               | 83.480                             | 16.520                               |
| IDF          | 0.990            | 0.996             | 0.010               | 0.007                | 0.004               | 64.850                             | 35.150                               |
| KAM          | 0.972            | 0.989             | 0.028               | 0.017                | 0.011               | 61.330                             | 38.670                               |
| KST          | 0.972            | 0.991             | 0.028               | 0.018                | 0.009               | 65.880                             | 34.120                               |
| LAC          | 0.979            | 0.991             | 0.021               | 0.012                | 0.009               | 58.890                             | 41.110                               |
| LES          | 0.980            | 0.995             | 0.020               | 0.015                | 0.005               | 76.260                             | 23.740                               |
| MFS          | 0.988            | 0.998             | 0.012               | 0.010                | 0.002               | 86.890                             | 13.110                               |
| MLS          | 0.983            | 0.997             | 0.017               | 0.014                | 0.003               | 82.730                             | 17.270                               |
| MLW          | 0.981            | 0.995             | 0.019               | 0.014                | 0.005               | 75.510                             | 24.490                               |
| NOL          | 0.979            | 0.989             | 0.021               | 0.010                | 0.011               | 48.580                             | 51.420                               |
| OMS          | 0.988            | 0.998             | 0.012               | 0.010                | 0.002               | 83.390                             | 16.610                               |
| OUS          | 0.980            | 0.991             | 0.020               | 0.011                | 0.009               | 55.750                             | 44.250                               |
| RHO          | 0.990            | 0.997             | 0.010               | 0.007                | 0.003               | 72.960                             | 27.040                               |
| RPL          | 0.978            | 0.993             | 0.022               | 0.015                | 0.007               | 69.530                             | 30.470                               |
| SBS          | 0.953            | 0.980             | 0.047               | 0.027                | 0.020               | 58.040                             | 41.960                               |
| SKF          | 0.990            | 0.997             | 0.010               | 0.007                | 0.003               | 73.470                             | 26.530                               |
| SKU          | 0.988            | 0.997             | 0.012               | 0.009                | 0.003               | 74.040                             | 25.960                               |
| SUF          | 0.996            | 0.999             | 0.004               | 0.003                | 0.001               | 73.710                             | 26.290                               |
| SWS          | 0.976            | 0.993             | 0.024               | 0.017                | 0.007               | 69.710                             | 30.290                               |
| TEX          | 0.995            | 0.999             | 0.004               | 0.003                | 0.001               | 67.450                             | 32.550                               |
| WAD          | 0.967            | 0.988             | 0.033               | 0.021                | 0.012               | 62.590                             | 37.410                               |
| WBS          | 0.969            | 0.994             | 0.031               | 0.026                | 0.006               | 82.330                             | 17.670                               |
| WGH          | 0.954            | 0.990             | 0.046               | 0.036                | 0.010               | 77.760                             | 22.240                               |
| WHH          | 0.965            | 0.992             | 0.035               | 0.027                | 0.008               | 78.200                             | 21.800                               |
| WKF          | 0.981            | 0.996             | 0.019               | 0.014                | 0.004               | 76.560                             | 23.440                               |
| ZWS          | 0.976            | 0.995             | 0.024               | 0.019                | 0.005               | 79.850                             | 20.150                               |

**Table S3.** Linear regression coefficients of the inbreeding coefficient for all (F), for inbred animals ( $F_{\text{inbred}}$ ), individual rate of inbreeding ( $\Delta F_i$ ), realized effective population size ( $N_e$ ), effective number of sires and dams (effective sires, effective dams), and effective number of sires and dams corrected for yearly trend of population size (effective sires corrected, effective dams corrected) within breed on birth year with their  $p$ -values testing difference to zero for each of the 35 sheep breeds.

| Breed | F               | P-value | $F_{\text{inbred}}$       | P-value | $\Delta F_i$   | P-value | $N_e$                    | P-value |
|-------|-----------------|---------|---------------------------|---------|----------------|---------|--------------------------|---------|
| AST   | 0.00257182      | <0.0001 | -0.00030000               | 0.8064  | -0.00017255    | 0.4103  | 0.3785000                | 0.9115  |
| BBS   | -0.00080000     | 0.1479  | -0.00225455               | 0.0662  | -0.00049136    | 0.0195  | 3.5031909                | 0.3039  |
| BDC   | -0.00042000     | 0.4469  | -0.00957273               | <0.0001 | -0.00043464    | 0.0386  | 15.3790273               | <0.0001 |
| BLS   | -0.00021818     | 0.6927  | 9.0909E-06                | 0.9941  | -0.00021236    | 0.3110  | 4.7276091                | 0.1656  |
| BRI   | 0.00025727      | 0.6412  | -0.00273636               | 0.0259  | -0.00036800    | 0.0796  | 3.3294273                | 0.3285  |
| CHA   | 0.00121000      | 0.0290  | -0.00644545               | <0.0001 | 0.00015582     | 0.4571  | -13.5814818              | <0.0001 |
| COF   | -0.00017455     | 0.7518  | -0.00091818               | 0.4533  | -0.00032136    | 0.1256  | 4.9428636                | 0.1472  |
| DOS   | -0.00094909     | 0.0863  | -0.00318182               | 0.0097  | -0.00077927    | 0.0002  | 5.2498273                | 0.1238  |
| GBS   | -0.00178364     | 0.0013  | -0.00489091               | <0.0001 | -0.00307918    | <0.0001 | 2.8032636                | 0.4106  |
| GGH   | 0.00113364      | 0.0407  | 0.00010909                | 0.9290  | 3.2727E-06     | 0.9875  | -0.5076364               | 0.8815  |
| IDF   | 0.00123455      | 0.0259  | -0.00580909               | <0.0001 | 0.00029791     | 0.1556  | -2.3897182               | 0.4829  |
| KAM   | -0.00045727     | 0.4077  | -0.00260909               | 0.0336  | -0.00045600    | 0.0301  | 5.7300000                | 0.0931  |
| KST   | -0.00127727     | 0.0212  | -0.00264545               | 0.0313  | -0.00068955    | 0.0011  | 2.9791182                | 0.3819  |
| LAC   | 0.00159909      | 0.0040  | -0.00129091               | 0.2919  | 0.00015364     | 0.4634  | -2.2760091               | 0.5040  |
| LES   | -5.0909E-05     | 0.9265  | -0.00060909               | 0.6188  | -0.00020727    | 0.3227  | 2.9423091                | 0.3878  |
| MFS   | 0.00017091      | 0.7568  | -0.00071818               | 0.5574  | -8.8182E-05    | 0.6738  | 5.4839000                | 0.1080  |
| MLS   | 0.00105364      | 0.0570  | 0.00090000                | 0.4623  | 1.9182E-05     | 0.9270  | -0.5564636               | 0.8702  |
| MLW   | 0.00082091      | 0.1376  | 0.00051818                | 0.6720  | 2.7364E-05     | 0.8961  | -1.3051273               | 0.7015  |
| NOL   | -8.1818E-06     | 0.9882  | -0.00234545               | 0.0560  | -0.00059827    | 0.0045  | 1.2214455                | 0.7198  |
| OMS   | 0.00074818      | 0.1759  | 0.00012727                | 0.9172  | -2.8273E-05    | 0.8926  | 0.7979455                | 0.8147  |
| OUS   | -0.00211818     | 0.0001  | -0.00377273               | 0.0022  | -0.00086891    | <0.0001 | 4.5640545                | 0.1807  |
| RHO   | 0.00095727      | 0.0836  | 0.0011000                 | 0.3691  | 1.5546E-05     | 0.9408  | -0.7858273               | 0.8175  |
| RPL   | 0.00021455      | 0.6975  | 0.0002000                 | 0.8702  | -0.00029055    | 0.1660  | 2.7436273                | 0.4206  |
| SBS   | 0.00451909      | <0.0001 | -0.00177273               | 0.1481  | 0.00017755     | 0.3969  | -1.0219636               | 0.7641  |
| SKF   | 0.00029636      | 0.5914  | 0.00021818                | 0.8585  | -6.5182E-05    | 0.7557  | 3.9129364                | 0.2509  |
| SKU   | -0.00086818     | 0.1164  | -0.00085455               | 0.4852  | -0.00052127    | 0.0133  | 5.0414909                | 0.1394  |
| SUF   | -0.00011182     | 0.8395  | -0.00158182               | 0.1968  | -0.00018527    | 0.3767  | 6.2154455                | 0.0686  |
| SWS   | 0.00179273      | 0.0013  | -0.00661818               | <0.0001 | 0.00027727     | 0.1862  | -1.3932636               | 0.6824  |
| TEX   | 0.00019273      | 0.7270  | -0.00025455               | 0.8352  | 1.5455E-06     | 0.9941  | -0.1431273               | 0.9665  |
| WAD   | -0.00013909     | 0.8011  | -9.0909E-06               | 0.9941  | -0.00064055    | 0.0024  | 0.9736818                | 0.7749  |
| WBS   | 0.00175636      | 0.0016  | 0.00158182                | 0.1968  | 2.0818E-05     | 0.9208  | -0.1801636               | 0.9578  |
| WGH   | 0.00211909      | 0.0001  | 0.00137273                | 0.2625  | -4.2364E-05    | 0.8397  | 0.3264000                | 0.9236  |
| WHH   | 0.00020545      | 0.7097  | 0.00030000                | 0.8064  | -0.00013227    | 0.5278  | 1.8864091                | 0.5796  |
| WKF   | 0.00117727      | 0.0336  | 0.00122727                | 0.3163  | 6.7727E-05     | 0.7464  | -1.5443636               | 0.6502  |
| ZWS   | -0.00301909     | <0.0001 | -0.00638182               | <0.0001 | -0.00145382    | <0.0001 | 9.6558091                | 0.0048  |
| Breed | Effective sires | P-value | Effective sires corrected | P-value | Effective dams | P-value | Effective dams corrected | P-value |
| AST   | 1.3977620       | 0.0128  | 0.1376330                 | 0.8768  | 25.523959      | 0.2284  | 8.052918                 | 0.7752  |
| BBS   | 0.6553785       | 0.2415  | 0.2351312                 | 0.6975  | 0.155689       | 0.9941  | 3.263861                 | 0.8651  |
| BDC   | -0.1929619      | 0.7299  | 0.0837152                 | 0.8977  | 3.317003       | 0.8755  | 2.022670                 | 0.9221  |
| BLS   | -0.2986127      | 0.5933  | -0.8679244                | 0.1194  | 30.571048      | 0.1493  | 10.042333                | 0.5696  |
| BRI   | -0.0101136      | 0.9856  | -0.0527645                | 0.9181  | -0.728827      | 0.9725  | -1.885221                | 0.9079  |
| CHA   | 0.8955413       | 0.1098  | 0.9157122                 | 0.0729  | -8.206857      | 0.6982  | -6.093119                | 0.7063  |
| COF   | 2.3174354       | <0.0001 | 3.1909834                 | 0.0206  | 79.504973      | 0.0002  | 29.770881                | 0.4944  |
| DOS   | 1.0511908       | 0.0607  | -1.3963288                | 0.2491  | 78.407749      | 0.0002  | 25.284403                | 0.5107  |

|     |            |         |            |        |            |        |            |        |
|-----|------------|---------|------------|--------|------------|--------|------------|--------|
| GBS | 1.4891248  | 0.0081  | 0.9014552  | 0.4946 | 15.310816  | 0.4696 | 4.519480   | 0.9141 |
| GGH | -1.3195299 | 0.0188  | -0.5834189 | 0.3274 | -50.145884 | 0.0183 | 8.774497   | 0.6426 |
| IDF | -0.2291243 | 0.6819  | -0.0924949 | 0.9259 | 18.522311  | 0.3818 | 10.663401  | 0.7357 |
| KAM | -0.0765157 | 0.8911  | -0.1616196 | 0.7967 | -8.636978  | 0.6833 | 1.808054   | 0.9277 |
| KST | 1.4702897  | 0.0089  | -1.4514672 | 0.6292 | 33.223530  | 0.1172 | -1.777999  | 0.9851 |
| LAC | 0.1214333  | 0.8280  | 0.0739809  | 0.8853 | -0.921454  | 0.9653 | -3.985348  | 0.8067 |
| LES | 0.6642898  | 0.2352  | 1.3028256  | 0.1652 | 62.628535  | 0.0033 | 11.517747  | 0.6988 |
| MFS | -1.3033198 | 0.0202  | -0.2063265 | 0.7900 | -87.672303 | <.0001 | 29.687739  | 0.2282 |
| MLS | -2.8295127 | <0.0001 | -0.0608170 | 0.9615 | -235.08740 | <.0001 | -13.023427 | 0.7445 |
| MLW | -1.0504635 | 0.0609  | -1.3942702 | 0.0331 | -32.590520 | 0.1243 | 27.741858  | 0.1807 |
| NOL | 0.5586895  | 0.3179  | 1.2648623  | 0.0254 | -6.997348  | 0.7410 | 1.112850   | 0.9504 |
| OMS | -0.2301639 | 0.6805  | 0.3033274  | 0.6012 | -8.857299  | 0.6756 | 16.362185  | 0.3749 |
| OUS | 1.4854559  | 0.0082  | -1.5512434 | 0.2066 | 16.551681  | 0.4344 | 2.635116   | 0.9461 |
| RHO | 1.5928732  | 0.0046  | 1.3717309  | 0.0108 | 46.426011  | 0.0289 | 19.879423  | 0.2423 |
| RPL | -2.0946461 | 0.0002  | -0.0105269 | 0.9920 | -90.884191 | <.0001 | 0.303790   | 0.9927 |
| SBS | 0.0833519  | 0.8815  | 0.0713525  | 0.9188 | 3.830274   | 0.8564 | 1.801805   | 0.9353 |
| SKF | -0.5337182 | 0.3400  | 1.9383048  | 0.0063 | -64.561623 | 0.0025 | -1.454652  | 0.9482 |
| SKU | -1.3658783 | 0.0150  | -0.9385917 | 0.1636 | -38.057980 | 0.0729 | -1.073040  | 0.9599 |
| SUF | 0.0482998  | 0.9311  | -0.1801453 | 0.7725 | -29.385841 | 0.1657 | 2.455903   | 0.9012 |
| SWS | 0.3924671  | 0.4827  | 0.6370204  | 0.3560 | -4.157089  | 0.8443 | -1.877261  | 0.9317 |
| TEX | -3.9376294 | <0.0001 | -0.8419759 | 0.6393 | -74.998110 | 0.0005 | -2.358563  | 0.9670 |
| WAD | 0.7058926  | 0.2072  | 0.6469372  | 0.2348 | -6.142446  | 0.7717 | 1.195780   | 0.9448 |
| WBS | 0.6680274  | 0.2326  | 0.5561513  | 0.2776 | 13.722460  | 0.5169 | 10.608552  | 0.5140 |
| WGH | 1.1826512  | 0.0350  | 1.0697427  | 0.0369 | 10.101046  | 0.6333 | 6.545693   | 0.6864 |
| WHH | -0.2012795 | 0.7188  | 0.0864004  | 0.8924 | -45.729781 | 0.0313 | 8.088175   | 0.6901 |
| WKF | -0.9858266 | 0.0785  | -0.8963372 | 0.1294 | 15.253782  | 0.4713 | 13.623847  | 0.4672 |
| ZWS | 0.5894136  | 0.2921  | -0.1687871 | 0.8805 | 6.884984   | 0.7450 | 0.194688   | 0.9956 |

**Table S4.** Linear regression coefficients of the inbreeding coefficients according to Ballou ( $F_{a\_Bal}$ ), Kalinowski ( $F_{a\_Kal}$ ,  $F_{a\_New}$ ) and Baumung (AHC), within breed on birth year with their  $p$ -values testing difference to zero for each of the 35 sheep breeds.

| Breed | $F_{a\_Bal}$ | P-value | $F_{a\_Kal}$  | P-value | $F_{a\_New}$  | P-value | AHC          | P-value |
|-------|--------------|---------|---------------|---------|---------------|---------|--------------|---------|
| AST   | 0.0094272727 | <0.0001 | 0.0020090909  | <0.0001 | 0.0005636364  | 0.2213  | 0.0136727273 | <0.0001 |
| BBS   | 0.0042545455 | <0.0001 | 0.0002181818  | 0.1900  | -0.0010000000 | 0.0304  | 0.0053818182 | <0.0001 |
| BDC   | 0.0009454545 | 0.1171  | -0.0000272727 | 0.8697  | -0.0003636364 | 0.4297  | 0.0009545455 | 0.1895  |
| BLS   | 0.0060363636 | <0.0001 | 0.0004818182  | 0.0040  | -0.0008727273 | 0.0587  | 0.0073727273 | <0.0001 |
| BRI   | 0.0020000000 | 0.0010  | 0.0001363636  | 0.4123  | 0.0001727273  | 0.7075  | 0.0023727273 | 0.0012  |
| CHA   | 0.0003636364 | 0.5460  | 0.0000818182  | 0.6227  | 0.0012000000  | 0.0095  | 0.0003636364 | 0.6168  |
| COF   | 0.0069727273 | <0.0001 | 0.0003818182  | 0.0222  | -0.0005090909 | 0.2692  | 0.0091818182 | <0.0001 |
| DOS   | 0.0070454545 | <0.0001 | 0.0001545455  | 0.3529  | -0.0010909091 | 0.0183  | 0.0097545455 | <0.0001 |
| GBS   | 0.0031909091 | <0.0001 | 0.0002363636  | 0.1557  | -0.0020727273 | <0.0001 | 0.0033454545 | <0.0001 |
| GGH   | 0.0068636364 | <0.0001 | 0.0008363636  | <0.0001 | 0.0003545455  | 0.4413  | 0.0080363636 | <0.0001 |
| IDF   | 0.0010363636 | 0.0860  | 0.0001818182  | 0.2745  | 0.0010727273  | 0.0203  | 0.0010545455 | 0.1473  |
| KAM   | 0.0086636364 | <0.0001 | 0.0004363636  | 0.0090  | -0.0008727273 | 0.0587  | 0.0106909091 | <0.0001 |
| KST   | 0.0019727273 | 0.0012  | -0.0003545455 | 0.0336  | -0.0009636364 | 0.0369  | 0.0028272727 | 0.0001  |
| LAC   | 0.0030363636 | <0.0001 | 0.0005454545  | 0.0011  | 0.0010909091  | 0.0183  | 0.0030818182 | <0.0001 |
| LES   | 0.0066363636 | <0.0001 | 0.0002909091  | 0.0809  | -0.0003636364 | 0.4297  | 0.0089272727 | <0.0001 |
| MFS   | 0.0042636364 | <0.0001 | 0.0002545455  | 0.1264  | -0.0000727273 | 0.8745  | 0.0049363636 | <0.0001 |
| MLS   | 0.0048090909 | <0.0001 | 0.0005818182  | 0.0005  | 0.0004818182  | 0.2956  | 0.0060090909 | <0.0001 |
| MLW   | 0.0029818182 | <0.0001 | 0.0002363636  | 0.1557  | 0.0005727273  | 0.2140  | 0.0032636364 | <0.0001 |
| NOL   | 0.0045636364 | <0.0001 | 0.0003545455  | 0.0336  | -0.0004090909 | 0.3744  | 0.0054909091 | <0.0001 |
| OMS   | 0.0070090909 | <0.0001 | 0.0005090909  | 0.0024  | 0.0002818182  | 0.5405  | 0.0085909091 | <0.0001 |
| OUS   | 0.0035909091 | <0.0001 | -0.0005545455 | 0.0009  | -0.0015636364 | 0.0008  | 0.0052818182 | <0.0001 |
| RHO   | 0.0041636364 | <0.0001 | 0.0003909091  | 0.0192  | 0.0006000000  | 0.1930  | 0.0047636364 | <0.0001 |
| RPL   | 0.0080636364 | <0.0001 | 0.0008545455  | <0.0001 | -0.0005545455 | 0.2288  | 0.0114636364 | <0.0001 |
| SBS   | 0.0078090909 | <0.0001 | 0.0014090909  | <0.0001 | 0.0031272727  | <0.0001 | 0.0089454545 | <0.0001 |
| SKF   | 0.0031090909 | <0.0001 | 0.0001090909  | 0.5118  | 0.0001727273  | 0.7075  | 0.0034818182 | <0.0001 |
| SKU   | 0.0065818182 | <0.0001 | 0.0001454545  | 0.3819  | -0.0009000000 | 0.0512  | 0.0088181818 | <0.0001 |
| SUF   | 0.0017454545 | 0.0040  | 0.0000454545  | 0.7845  | -0.0001363636 | 0.7670  | 0.0019090909 | 0.0090  |
| SWS   | 0.0026454545 | <0.0001 | 0.0003000000  | 0.0719  | 0.0015090909  | 0.0011  | 0.0026454545 | 0.0003  |
| TEX   | 0.0003909091 | 0.5164  | -0.0000454545 | 0.7845  | -0.0001636364 | 0.7222  | 0.0004909091 | 0.4994  |
| WAD   | 0.0067545455 | <0.0001 | 0.0008545455  | <0.0001 | -0.0009545455 | 0.0388  | 0.0100090909 | <0.0001 |
| WBS   | 0.0077545455 | <0.0001 | 0.0011363636  | <0.0001 | 0.0006545455  | 0.1557  | 0.0104545455 | <0.0001 |
| WGH   | 0.0130909091 | <0.0001 | 0.0022090909  | <0.0001 | -0.0000818182 | 0.8589  | 0.0189363636 | <0.0001 |
| WHH   | 0.0070909091 | <0.0001 | 0.0005000000  | 0.0028  | -0.0002363636 | 0.6077  | 0.0101090909 | <0.0001 |
| WKF   | 0.0046000000 | <0.0001 | 0.0005363636  | 0.0014  | 0.0006000000  | 0.1930  | 0.0052454545 | <0.0001 |
| ZWS   | 0.0008545455 | 0.1565  | -0.0008454545 | <0.0001 | -0.0021545455 | <0.0001 | 0.0012545455 | 0.0850  |

**Table S5.** Least-Square (LS) means for the size of the reference population, genealogical estimators number of founders ( $f$ ), effective number of founders ( $f_e$ ), effective number of founder genomes ( $f_g$ ), effective number of ancestors ( $f_a$ ), and the ratios  $f_e/f$ ,  $f_a/f_e$ ,  $f_g/f_e$ , losses due to drift and unequal contributions from founders, inbreeding coefficient ( $F$ ), individual rate of inbreeding ( $\Delta F_i$ ), realized effective population size ( $N_e$ ), expected  $\Delta F_i$  in 50 years, degree of deviation ( $\alpha$ ) of random mating from Hardy–Weinberg proportions, number of progeny per sire and year, effective number of sires and dams by breeding direction groups with their standard errors, and  $p$ -values for differences among LS-means.

| Group          | Size of reference population | P-value for differences among LS-means |        |         |                 |        |        |
|----------------|------------------------------|----------------------------------------|--------|---------|-----------------|--------|--------|
|                |                              | Merino                                 | Meat   | Country | Mountain /Stone | Heath  | Milk   |
| Merino         | 95913 ± 15505                |                                        |        |         |                 |        |        |
| Meat           | 38753 ± 10151                | 0.0046                                 |        |         |                 |        |        |
| Country        | 28979 ± 10151                | 0.0012                                 | 0.5016 |         |                 |        |        |
| Mountain/Stone | 9068 ± 10964                 | <0.0001                                | 0.0568 | 0.1934  |                 |        |        |
| Heath          | 23482 ± 13429                | 0.0015                                 | 0.3721 | 0.7464  | 0.4128          |        |        |
| Milk           | 16456 ± 15506                | 0.0011                                 | 0.2390 | 0.5048  | 0.7002          | 0.7345 |        |
| Exotic         | 4305 ± 12011                 | <0.0001                                | 0.0370 | 0.1279  | 0.7718          | 0.2962 | 0.5406 |
| Group          | No of founders               | Merino                                 | Meat   | Country | Mountain /Stone | Heath  | Milk   |
| Merino         | 5335 ± 803                   |                                        |        |         |                 |        |        |
| Meat           | 2237 ± 525                   | 0.0032                                 |        |         |                 |        |        |
| Country        | 1562 ± 525                   | 0.0005                                 | 0.3717 |         |                 |        |        |
| Mountain/Stone | 501 ± 568                    | <0.0001                                | 0.0329 | 0.1808  |                 |        |        |
| Heath          | 1713 ± 695                   | 0.0020                                 | 0.5518 | 0.8647  | 0.1879          |        |        |
| Milk           | 1108 ± 803                   | 0.0009                                 | 0.2490 | 0.6392  | 0.5420          | 0.5737 |        |
| Exotic         | 527 ± 622                    | <0.0001                                | 0.0448 | 0.2137  | 0.9758          | 0.2141 | 0.5717 |
| Group          | No of effective founders     | Merino                                 | Meat   | Country | Mountain /Stone | Heath  | Milk   |
| Merino         | 202 ± 51                     |                                        |        |         |                 |        |        |
| Meat           | 205 ± 33                     | 0.9612                                 |        |         |                 |        |        |
| Country        | 107 ± 33                     | 0.1291                                 | 0.0466 |         |                 |        |        |
| Mountain/Stone | 55 ± 36                      | 0.0252                                 | 0.0047 | 0.2950  |                 |        |        |
| Heath          | 107 ± 44                     | 0.1683                                 | 0.0864 | 0.9986  | 0.3664          |        |        |
| Milk           | 127 ± 51                     | 0.3061                                 | 0.2101 | 0.7437  | 0.2551          | 0.7666 |        |
| Exotic         | 77 ± 39                      | 0.0612                                 | 0.0190 | 0.5604  | 0.6844          | 0.6122 | 0.4394 |
| Group          | No of founder genomes        | Merino                                 | Meat   | Country | Mountain /Stone | Heath  | Milk   |
| Merino         | 33.0 ± 11.9                  |                                        |        |         |                 |        |        |
| Meat           | 62.8 ± 7.8                   | 0.0464                                 |        |         |                 |        |        |
| Country        | 27.8 ± 7.8                   | 0.7172                                 | 0.0037 |         |                 |        |        |
| Mountain/Stone | 17.9 ± 8.5                   | 0.3107                                 | 0.0006 | 0.3980  |                 |        |        |
| Heath          | 22.9 ± 10.4                  | 0.5269                                 | 0.0047 | 0.7083  | 0.7122          |        |        |
| Milk           | 29.1 ± 11.9                  | 0.8148                                 | 0.0253 | 0.9320  | 0.4540          | 0.7009 |        |
| Exotic         | 26.8 ± 9.3                   | 0.6844                                 | 0.0061 | 0.9360  | 0.4835          | 0.7797 | 0.8847 |
| Group          | No of effective ancestors    | Merino                                 | Meat   | Country | Mountain /Stone | Heath  | Milk   |
| Merino         | 73.2 ± 22.8                  |                                        |        |         |                 |        |        |
| Meat           | 108.0 ± 14.9                 | 0.2113                                 |        |         |                 |        |        |
| Country        | 61.8 ± 14.9                  | 0.6799                                 | 0.0370 |         |                 |        |        |
| Mountain/Stone | 33.3 ± 16.1                  | 0.1648                                 | 0.0020 | 0.2056  |                 |        |        |
| Heath          | 52.4 ± 19.7                  | 0.4975                                 | 0.0328 | 0.7078  | 0.4599          |        |        |
| Milk           | 57.0 ± 22.8                  | 0.6202                                 | 0.0717 | 0.8615  | 0.4037          | 0.8806 |        |

|                |                                         |               |             |                |                            |              |             |
|----------------|-----------------------------------------|---------------|-------------|----------------|----------------------------|--------------|-------------|
| Exotic         | 46.9 ± 17.7                             | 0.3694        | 0.0132      | 0.5233         | 0.5762                     | 0.8348       | 0.7275      |
| <b>Group</b>   | <b>f<sub>e</sub>/f</b>                  | <b>Merino</b> | <b>Meat</b> | <b>Country</b> | <b>Mountain<br/>/Stone</b> | <b>Heath</b> | <b>Milk</b> |
| Merino         | 0.042 ± 0.034                           |               |             |                |                            |              |             |
| Meat           | 0.111 ± 0.022                           | 0.0974        |             |                |                            |              |             |
| Country        | 0.082 ± 0.022                           | 0.3306        | 0.3574      |                |                            |              |             |
| Mountain/Stone | 0.123 ± 0.024                           | 0.0583        | 0.7053      | 0.2106         |                            |              |             |
| Heath          | 0.069 ± 0.029                           | 0.5518        | 0.2582      | 0.7244         | 0.1581                     |              |             |
| Milk           | 0.175 ± 0.034                           | 0.0093        | 0.1232      | 0.0282         | 0.2215                     | 0.0242       |             |
| Exotic         | 0.166 ± 0.026                           | 0.0067        | 0.1141      | 0.0192         | 0.2304                     | 0.0185       | 0.8475      |
| <b>Group</b>   | <b>f<sub>a</sub>/f<sub>e</sub></b>      | <b>Merino</b> | <b>Meat</b> | <b>Country</b> | <b>Mountain<br/>/Stone</b> | <b>Heath</b> | <b>Milk</b> |
| Merino         | 0.410 ± 0.075                           |               |             |                |                            |              |             |
| Meat           | 0.552 ± 0.049                           | 0.1218        |             |                |                            |              |             |
| Country        | 0.600 ± 0.049                           | 0.0427        | 0.5016      |                |                            |              |             |
| Mountain/Stone | 0.645 ± 0.053                           | 0.0157        | 0.2077      | 0.5302         |                            |              |             |
| Heath          | 0.510 ± 0.065                           | 0.3185        | 0.6077      | 0.2808         | 0.1174                     |              |             |
| Milk           | 0.497 ± 0.075                           | 0.4186        | 0.5374      | 0.2592         | 0.1156                     | 0.8912       |             |
| Exotic         | 0.672 ± 0.058                           | 0.0097        | 0.1254      | 0.3462         | 0.7345                     | 0.0729       | 0.0739      |
| <b>Group</b>   | <b>f<sub>g</sub>/f<sub>e</sub></b>      | <b>Merino</b> | <b>Meat</b> | <b>Country</b> | <b>Mountain<br/>/Stone</b> | <b>Heath</b> | <b>Milk</b> |
| Merino         | 0.183 ± 0.056                           |               |             |                |                            |              |             |
| Meat           | 0.329 ± 0.037                           | 0.0382        |             |                |                            |              |             |
| Country        | 0.279 ± 0.037                           | 0.1628        | 0.3459      |                |                            |              |             |
| Mountain/Stone | 0.377 ± 0.040                           | 0.0087        | 0.3838      | 0.0817         |                            |              |             |
| Heath          | 0.216 ± 0.049                           | 0.6565        | 0.0752      | 0.3117         | 0.0163                     |              |             |
| Milk           | 0.293 ± 0.056                           | 0.1753        | 0.6000      | 0.8334         | 0.2349                     | 0.3085       |             |
| Exotic         | 0.380 ± 0.044                           | 0.0097        | 0.3781      | 0.0875         | 0.9581                     | 0.0182       | 0.3100      |
| <b>Group</b>   | <b>Loss due to drift</b>                | <b>Merino</b> | <b>Meat</b> | <b>Country</b> | <b>Mountain<br/>/Stone</b> | <b>Heath</b> | <b>Milk</b> |
| Merino         | 0.0127 ± 0.0039                         |               |             |                |                            |              |             |
| Meat           | 0.0078 ± 0.0025                         | 0.2844        |             |                |                            |              |             |
| Country        | 0.0146 ± 0.0025                         | 0.6736        | 0.0602      |                |                            |              |             |
| Mountain/Stone | 0.0198 ± 0.0027                         | 0.1362        | 0.0026      | 0.1661         |                            |              |             |
| Heath          | 0.0221 ± 0.0033                         | 0.0690        | 0.0016      | 0.0771         | 0.5821                     |              |             |
| Milk           | 0.0129 ± 0.0038                         | 0.9736        | 0.2677      | 0.7023         | 0.1460                     | 0.0741       |             |
| Exotic         | 0.0129 ± 0.0029                         | 0.9720        | 0.1942      | 0.6508         | 0.0913                     | 0.0435       | 0.9984      |
| <b>Group</b>   | <b>Loss due to<br/>unequal founders</b> | <b>Merino</b> | <b>Meat</b> | <b>Country</b> | <b>Mountain<br/>/Stone</b> | <b>Heath</b> | <b>Milk</b> |
| Merino         | 0.0030 ± 0.0024                         |               |             |                |                            |              |             |
| Meat           | 0.0041 ± 0.0016                         | 0.7042        |             |                |                            |              |             |
| Country        | 0.0059 ± 0.0016                         | 0.3123        | 0.4118      |                |                            |              |             |
| Mountain/Stone | 0.0120 ± 0.0017                         | 0.0048        | 0.0019      | 0.0141         |                            |              |             |
| Heath          | 0.0061 ± 0.0021                         | 0.3411        | 0.4549      | 0.9626         | 0.0353                     |              |             |
| Milk           | 0.0059 ± 0.0024                         | 0.3985        | 0.5331      | 0.9886         | 0.0473                     | 0.9591       |             |
| Exotic         | 0.0078 ± 0.0019                         | 0.1267        | 0.1419      | 0.4591         | 0.1040                     | 0.5461       | 0.5432      |
| <b>Group</b>   | <b>F</b>                                | <b>Merino</b> | <b>Meat</b> | <b>Country</b> | <b>Mountain<br/>/Stone</b> | <b>Heath</b> | <b>Milk</b> |
| Merino         | 0.0203±0.0077                           |               |             |                |                            |              |             |
| Meat           | 0.0207±0.0050                           | 0.9614        |             |                |                            |              |             |
| Country        | 0.0374±0.0050                           | 0.0721        | 0.0260      |                |                            |              |             |
| Mountain/Stone | 0.0420±0.0054                           | 0.0282        | 0.0075      | 0.5388         |                            |              |             |
| Heath          | 0.0391±0.0066                           | 0.0738        | 0.0355      | 0.8388         | 0.7386                     |              |             |

|                |                                                    |               |             |                |                            |              |             |
|----------------|----------------------------------------------------|---------------|-------------|----------------|----------------------------|--------------|-------------|
| Milk           | 0.0186±0.0077                                      | 0.8815        | 0.8222      | 0.0501         | 0.0191                     | 0.0532       |             |
| Exotic         | 0.0301±0.0059                                      | 0.3217        | 0.2399      | 0.3528         | 0.1486                     | 0.3180       | 0.2491      |
| <b>Group</b>   | <b>ΔF<sub>i</sub></b>                              | <b>Merino</b> | <b>Meat</b> | <b>Country</b> | <b>Mountain<br/>/Stone</b> | <b>Heath</b> | <b>Milk</b> |
| Merino         | 0.00324±0.00227                                    |               |             |                |                            |              |             |
| Meat           | 0.00490±0.00149                                    | 0.5457        |             |                |                            |              |             |
| Country        | 0.00758±0.00149                                    | 0.1216        | 0.2140      |                |                            |              |             |
| Mountain/Stone | 0.01319±0.00161                                    | 0.0013        | 0.0008      | 0.0162         |                            |              |             |
| Heath          | 0.00627±0.00197                                    | 0.3222        | 0.5835      | 0.6004         | 0.0111                     |              |             |
| Milk           | 0.00456±0.00228                                    | 0.6840        | 0.9014      | 0.2764         | 0.0044                     | 0.5745       |             |
| Exotic         | 0.00857±0.00176                                    | 0.0742        | 0.1226      | 0.6695         | 0.0632                     | 0.3909       | 0.1740      |
| <b>Group</b>   | <b>N<sub>e</sub></b>                               | <b>Merino</b> | <b>Meat</b> | <b>Country</b> | <b>Mountain<br/>/Stone</b> | <b>Heath</b> | <b>Milk</b> |
| Merino         | 158.3±19.5                                         |               |             |                |                            |              |             |
| Meat           | 119.7±12.8                                         | 0.1095        |             |                |                            |              |             |
| Country        | 82.8±12.8                                          | 0.0031        | 0.0510      |                |                            |              |             |
| Mountain/Stone | 48.4±13.8                                          | <0.0001       | 0.0007      | 0.0785         |                            |              |             |
| Heath          | 88.5±16.9                                          | 0.0117        | 0.1535      | 0.7880         | 0.0768                     |              |             |
| Milk           | 110.6±19.5                                         | 0.0955        | 0.7006      | 0.2438         | 0.0148                     | 0.4010       |             |
| Exotic         | 65.8±15.1                                          | 0.0008        | 0.0111      | 0.3988         | 0.4030                     | 0.3251       | 0.0807      |
| <b>Group</b>   | <b>Expected ΔF<sub>i</sub> in 50<br/>years</b>     | <b>Merino</b> | <b>Meat</b> | <b>Country</b> | <b>Mountain<br/>/Stone</b> | <b>Heath</b> | <b>Milk</b> |
| Merino         | 0.0399 ± 0.0256                                    |               |             |                |                            |              |             |
| Meat           | 0.0631 ± 0.0167                                    | 0.4554        |             |                |                            |              |             |
| Country        | 0.0846 ± 0.0167                                    | 0.1549        | 0.3705      |                |                            |              |             |
| Mountain/Stone | 0.1605 ± 0.0181                                    | 0.0006        | 0.0005      | 0.0046         |                            |              |             |
| Heath          | 0.0761 ± 0.0221                                    | 0.2944        | 0.6429      | 0.7608         | 0.0063                     |              |             |
| Milk           | 0.0712 ± 0.0256                                    | 0.3945        | 0.7921      | 0.6642         | 0.0081                     | 0.8864       |             |
| Exotic         | 0.1149 ± 0.0198                                    | 0.0281        | 0.0556      | 0.2534         | 0.0998                     | 0.2025       | 0.1880      |
| <b>Group</b>   | <b>α</b>                                           | <b>Merino</b> | <b>Meat</b> | <b>Country</b> | <b>Mountain<br/>/Stone</b> | <b>Heath</b> | <b>Milk</b> |
| Merino         | 0.00753±0.00562                                    |               |             |                |                            |              |             |
| Meat           | 0.01235±0.00397                                    | 0.4897        |             |                |                            |              |             |
| Country        | 0.02139±0.00368                                    | 0.0485        | 0.1062      |                |                            |              |             |
| Mountain/Stone | 0.02093±0.00397                                    | 0.0615        | 0.1377      | 0.9340         |                            |              |             |
| Heath          | 0.01312±0.00435                                    | 0.4383        | 0.8970      | 0.1579         | 0.1955                     |              |             |
| Milk           | 0.01073±0.00562                                    | 0.6902        | 0.8159      | 0.1239         | 0.1494                     | 0.7395       |             |
| Exotic         | 0.01808±0.00435                                    | 0.1489        | 0.3391      | 0.5664         | 0.6319                     | 0.4270       | 0.3100      |
| <b>Group</b>   | <b>Number of<br/>progeny per sire<br/>and year</b> | <b>Merino</b> | <b>Meat</b> | <b>Country</b> | <b>Mountain<br/>/Stone</b> | <b>Heath</b> | <b>Milk</b> |
| Merino         | 68.4 ± 4.5                                         |               |             |                |                            |              |             |
| Meat           | 21.6 ± 2.8                                         | <0.0001       |             |                |                            |              |             |
| Country        | 25.5 ± 3.0                                         | <0.0001       | 0.3492      |                |                            |              |             |
| Mountain/Stone | 16.2 ± 3.2                                         | <0.0001       | 0.2046      | 0.0406         |                            |              |             |
| Heath          | 26.3 ± 3.9                                         | <0.0001       | 0.3384      | 0.8697         | 0.0541                     |              |             |
| Milk           | 20.7 ± 5.5                                         | <0.0001       | 0.8830      | 0.4530         | 0.4803                     | 0.4167       |             |
| Exotic         | 9.9 ± 3.5                                          | <0.0001       | 0.0137      | 0.0020         | 0.1978                     | 0.0041       | 0.1095      |
| <b>Group</b>   | <b>Number of<br/>effective sires</b>               | <b>Merino</b> | <b>Meat</b> | <b>Country</b> | <b>Mountain<br/>/Stone</b> | <b>Heath</b> | <b>Milk</b> |
| Merino         | 58.7 ± 5.0                                         |               |             |                |                            |              |             |
| Meat           | 58.7 ± 3.1                                         | 0.9961        |             |                |                            |              |             |
| Country        | 44.4 ± 3.3                                         | 0.0174        | 0.0016      |                |                            |              |             |



|                |                                 |               |             |                |                        |              |             |
|----------------|---------------------------------|---------------|-------------|----------------|------------------------|--------------|-------------|
| Mountain/Stone | 22.7 ± 3.5                      | <0.0001       | <0.0001     | <0.0001        |                        |              |             |
| Heath          | 41.2 ± 4.3                      | 0.0087        | 0.0011      | 0.5579         | 0.0010                 |              |             |
| Milk           | 37.7 ± 6.1                      | 0.0082        | 0.0023      | 0.3314         | 0.0355                 | 0.6343       |             |
| Exotic         | 24.4 ± 3.9                      | <0.0001       | <0.0001     | <0.0001        | 0.7461                 | 0.0041       | 0.0688      |
| <b>Group</b>   | <b>Number of effective dams</b> | <b>Merino</b> | <b>Meat</b> | <b>Country</b> | <b>Mountain /Stone</b> | <b>Heath</b> | <b>Milk</b> |
| Merino         | 4096.9 ± 182.8                  |               |             |                |                        |              |             |
| Meat           | 1467.9 ± 111.9                  | <0.0001       |             |                |                        |              |             |
| Country        | 1405.4 ± 119.7                  | <0.0001       | 0.7031      |                |                        |              |             |
| Mountain/Stone | 385.7 ± 129.3                   | <0.0001       | <0.0001     | <0.0001        |                        |              |             |
| Heath          | 1443.4 ± 158.3                  | <0.0001       | 0.8995      | 0.8483         | <0.0001                |              |             |
| Milk           | 979.9 ± 223.9                   | <0.0001       | 0.0520      | 0.0945         | 0.0221                 | 0.0918       |             |
| Exotic         | 240.7 ± 141.6                   | <0.0001       | <0.0001     | <0.0001        | 0.4497                 | <0.0001      | 0.0055      |

Assignment of breeds to breed directions:

| <b>Group</b>   | <b>Breed</b>                           |
|----------------|----------------------------------------|
| Merino         | MFS, MLS, MLW                          |
| Meat           | CHA, DOS, IDF, SKF, SUF, SWS, TEX, WKF |
| Country        | BLS, BRI, COF, LES, RHO, RPL, WAD      |
| Mountain/Stone | AST, BBS, GBS, KST, SBS, WBS           |
| Heath          | GGH, SKU, WGH, WHH                     |
| Milk           | LAC, OMS                               |
| Exotic         | BDC, KAM, NOL, OUS, ZWS                |

**Table S6.** Least-Square (LS) means for the ancestral inbreeding coefficient according to Ballou ( $F_{a\_Bal}$ ), Kalinowski ( $F_{a\_Kal}$ ) and Baumung (AHC) and new inbreeding coefficient according to Kalinowski ( $F_{a\_New}$ ) and its proportion of inbreeding by breeding direction groups with their standard errors, and  $p$ -values for differences among LS-means.

| Group          | $F_{a\_Bal}$               | P-value for differences among LS-means |        |         |                 |        |        |
|----------------|----------------------------|----------------------------------------|--------|---------|-----------------|--------|--------|
|                |                            | Merino                                 | Meat   | Country | Mountain /Stone | Heath  | Milk   |
| Merino         | 0.0620±0.0264              |                                        |        |         |                 |        |        |
| Meat           | 0.0511±0.0173              | 0.7333                                 |        |         |                 |        |        |
| Country        | 0.1044±0.0173              | 0.1895                                 | 0.0378 |         |                 |        |        |
| Mountain/Stone | 0.0893±0.0187              | 0.4050                                 | 0.1445 | 0.5577  |                 |        |        |
| Heath          | 0.1355±0.0229              | 0.0444                                 | 0.0355 | 0.2875  | 0.1290          |        |        |
| Milk           | 0.0373±0.0264              | 0.5142                                 | 0.6650 | 0.0424  | 0.1190          | 0.0089 |        |
| Exotic         | 0.0818±0.0204              | 0.5580                                 | 0.2619 | 0.4051  | 0.7875          | 0.0909 | 0.1937 |
| Group          | $F_{a\_Kal}$               | Merino                                 | Meat   | Country | Mountain /Stone | Heath  | Milk   |
| Merino         | 0.00433±0.00425            |                                        |        |         |                 |        |        |
| Meat           | 0.00414±0.00278            | 0.9703                                 |        |         |                 |        |        |
| Country        | 0.01214±0.00278            | 0.1353                                 | 0.0515 |         |                 |        |        |
| Mountain/Stone | 0.01233±0.00300            | 0.1354                                 | 0.0552 | 0.9632  |                 |        |        |
| Heath          | 0.01525±0.00368            | 0.0622                                 | 0.0229 | 0.5061  | 0.5442          |        |        |
| Milk           | 0.0033±0.004249            | 0.8690                                 | 0.8745 | 0.0938  | 0.0947          | 0.0430 |        |
| Exotic         | 0.00840±0.00329            | 0.4556                                 | 0.3316 | 0.3924  | 0.3849          | 0.1762 | 0.3539 |
| Group          | $F_{a\_New}$               | Merino                                 | Meat   | Country | Mountain /Stone | Heath  | Milk   |
| Merino         | 0.01600 ± 0.00398          |                                        |        |         |                 |        |        |
| Meat           | 0.01671 ± 0.00260          | 0.8816                                 |        |         |                 |        |        |
| Country        | 0.02629 ± 0.00260          | 0.0392                                 | 0.0147 |         |                 |        |        |
| Mountain/Stone | 0.02967 ± 0.00281          | 0.0090                                 | 0.0022 | 0.3852  |                 |        |        |
| Heath          | 0.02375 ± 0.00344          | 0.1519                                 | 0.1144 | 0.5617  | 0.1941          |        |        |
| Milk           | 0.01567 ± 0.00398          | 0.9532                                 | 0.8272 | 0.0337  | 0.0077          | 0.1357 |        |
| Exotic         | 0.02160 ± 0.00308          | 0.2751                                 | 0.2359 | 0.2552  | 0.0633          | 0.6454 | 0.2482 |
| Group          | Proportion of $F_{a\_New}$ | Merino                                 | Meat   | Country | Mountain /Stone | Heath  | Milk   |
| Merino         | 0.812 ± 0.069              |                                        |        |         |                 |        |        |
| Meat           | 0.860 ± 0.045              | 0.5688                                 |        |         |                 |        |        |
| Country        | 0.738 ± 0.045              | 0.3708                                 | 0.0653 |         |                 |        |        |
| Mountain/Stone | 0.722 ± 0.049              | 0.2902                                 | 0.0463 | 0.8104  |                 |        |        |
| Heath          | 0.629 ± 0.059              | 0.0538                                 | 0.0045 | 0.1576  | 0.2397          |        |        |
| Milk           | 0.879 ± 0.069              | 0.4971                                 | 0.8141 | 0.0958  | 0.0716          | 0.0103 |        |
| Exotic         | 0.761 ± 0.053              | 0.5588                                 | 0.1674 | 0.7410  | 0.5898          | 0.1105 | 0.1844 |
| Group          | AHC                        | Merino                                 | Meat   | Country | Mountain /Stone | Heath  | Milk   |
| Merino         | 0.06933±0.03446            |                                        |        |         |                 |        |        |
| Meat           | 0.05742±0.02256            | 0.7747                                 |        |         |                 |        |        |
| Country        | 0.12171±0.02256            | 0.2139                                 | 0.0536 |         |                 |        |        |
| Mountain/Stone | 0.10500±0.02436            | 0.4052                                 | 0.1631 | 0.6187  |                 |        |        |
| Heath          | 0.16100±0.02984            | 0.0541                                 | 0.0099 | 0.3027  | 0.1572          |        |        |
| Milk           | 0.04133±0.03446            | 0.5702                                 | 0.6989 | 0.0611  | 0.1426          | 0.0139 |        |
| Exotic         | 0.10040± 0.02669           | 0.4819                                 | 0.2291 | 0.5469  | 0.8996          | 0.1414 | 0.1862 |

Assignment of breeds to breed directions:

| Group          | Breed                                  |
|----------------|----------------------------------------|
| Merino         | MFS, MLS, MLW                          |
| Meat           | CHA, DOS, IDF, SKF, SUF, SWS, TEX, WKF |
| Country        | BLS, BRI, COF, LES, RHO, RPL, WAD      |
| Mountain/Stone | AST, BBS, GBS, KST, SBS, WBS           |
| Heath          | GGH, SKU, WGH, WHH                     |
| Milk           | LAC, OMS                               |
| Exotic         | BDC, KAM, NOL, OUS, ZWS                |

**Table S7.** Number of dams (No\_dams) and effective number of dams (Effective\_dams) for each birth year from 2010 to 2020 with their standard deviations (SD) for each of the 35 sheep breeds.

| Breed | Mean<br>(No_dams) | Min<br>(No_dams) | Max<br>(No_dams) | SD<br>(mean<br>No_dams) | Mean<br>(Effective<br>_dams) | Min<br>(Effective<br>_dams) | Max<br>(Effective<br>_dams) | SD (mean<br>Effective_<br>dams) |
|-------|-------------------|------------------|------------------|-------------------------|------------------------------|-----------------------------|-----------------------------|---------------------------------|
| AST   | 444.091           | 277              | 587              | 107.897                 | 369.971                      | 225.518                     | 495.061                     | 96.087                          |
| BBS   | 661.273           | 595              | 699              | 31.471                  | 535.350                      | 472.204                     | 562.307                     | 26.952                          |
| BDC   | 165.727           | 144              | 194              | 13.093                  | 136.939                      | 115.497                     | 165.024                     | 14.326                          |
| BLS   | 1742.273          | 1376             | 2002             | 227.525                 | 1495.256                     | 1193.530                    | 1713.536                    | 187.780                         |
| BRI   | 370.909           | 308              | 426              | 36.503                  | 304.210                      | 253.526                     | 348.023                     | 30.137                          |
| CHA   | 441.727           | 279              | 727              | 116.506                 | 385.298                      | 237.772                     | 636.028                     | 103.735                         |
| COF   | 2322.091          | 1882             | 2763             | 305.660                 | 1962.299                     | 1572.063                    | 2354.509                    | 272.995                         |
| DOS   | 1458.636          | 872              | 1955             | 328.512                 | 1184.069                     | 689.635                     | 1622.352                    | 279.428                         |
| GBS   | 164.182           | 78               | 243              | 62.740                  | 134.852                      | 61.357                      | 199.254                     | 53.318                          |
| GGH   | 2979.455          | 2324             | 3400             | 415.697                 | 2637.074                     | 2068.887                    | 3001.615                    | 363.576                         |
| IDF   | 451.273           | 357              | 578              | 72.875                  | 378.945                      | 300.755                     | 492.084                     | 66.296                          |
| KAM   | 181.000           | 78               | 264              | 64.271                  | 158.449                      | 68.504                      | 230.890                     | 56.391                          |
| KST   | 420.455           | 251              | 635              | 123.186                 | 366.935                      | 211.240                     | 563.590                     | 112.085                         |
| LAC   | 212.545           | 88               | 317              | 84.718                  | 183.859                      | 78.373                      | 274.994                     | 73.372                          |
| LES   | 2022.545          | 1476             | 2487             | 291.552                 | 1735.992                     | 1285.448                    | 2103.036                    | 237.992                         |
| MFS   | 4655.182          | 3358             | 5323             | 556.907                 | 3949.151                     | 2856.223                    | 4490.338                    | 458.165                         |
| MLS   | 8262.727          | 6080             | 9788             | 1055.943                | 6870.422                     | 5121.823                    | 8147.578                    | 856.561                         |
| MLW   | 1781.545          | 1195             | 2232             | 359.665                 | 1471.050                     | 1019.260                    | 1853.580                    | 280.113                         |
| NOL   | 437.636           | 272              | 507              | 71.697                  | 383.625                      | 240.447                     | 441.720                     | 61.561                          |
| OMS   | 2051.273          | 1726             | 2271             | 173.392                 | 1776.035                     | 1493.843                    | 1979.645                    | 155.121                         |
| OUS   | 438.727           | 368              | 512              | 55.254                  | 429.639                      | 358.822                     | 509.031                     | 59.503                          |
| RHO   | 2729.364          | 2170             | 3292             | 394.919                 | 2262.116                     | 1809.736                    | 2712.228                    | 320.119                         |
| RPL   | 1818.000          | 1152             | 2318             | 403.809                 | 1613.333                     | 1038.586                    | 2033.847                    | 345.458                         |
| SBS   | 103.000           | 68               | 124              | 19.173                  | 83.742                       | 53.702                      | 99.758                      | 15.837                          |
| SKF   | 5328.364          | 3715             | 5742             | 558.233                 | 4229.367                     | 1837.026                    | 4871.272                    | 909.691                         |
| SKU   | 1036.091          | 583              | 1378             | 218.083                 | 907.290                      | 521.388                     | 1210.947                    | 190.383                         |
| SUF   | 2792.364          | 2351             | 3055             | 207.073                 | 2384.935                     | 2022.827                    | 2616.254                    | 185.159                         |
| SWS   | 134.364           | 100              | 161              | 19.382                  | 118.246                      | 88.360                      | 140.174                     | 16.333                          |
| TEX   | 2352.182          | 1752             | 2836             | 303.322                 | 2085.110                     | 1567.501                    | 2490.501                    | 260.149                         |
| WAD   | 556.636           | 399              | 693              | 83.885                  | 464.919                      | 333.942                     | 578.202                     | 67.829                          |
| WBS   | 1003.091          | 884              | 1192             | 118.973                 | 823.622                      | 717.978                     | 982.998                     | 100.399                         |
| WGH   | 868.364           | 625              | 1069             | 137.002                 | 767.756                      | 547.798                     | 945.009                     | 121.281                         |
| WHH   | 1654.909          | 1081             | 1962             | 316.006                 | 1461.652                     | 952.350                     | 1730.780                    | 283.370                         |
| WKF   | 1137.000          | 1047             | 1242             | 62.844                  | 977.556                      | 913.852                     | 1059.076                    | 54.187                          |
| ZWS   | 112.364           | 73               | 169              | 27.707                  | 94.679                       | 57.525                      | 147.366                     | 25.923                          |

**Table S8.** Number of sires (No\_sires) and effective number of sires (Effective\_sires) for each birth year from 2010 to 2020 with their standard deviations (SD) for each of the 35 sheep breeds.

| Breed | Mean<br>(No_sires) | Min<br>(No_sires) | Max<br>(No_sires) | SD<br>(mean<br>No_sires) | Mean<br>(Effective<br>_sires) | Min<br>(Effective<br>_sires) | Max<br>(Effective_<br>sires) | SD<br>(mean<br>Effective_sires) |
|-------|--------------------|-------------------|-------------------|--------------------------|-------------------------------|------------------------------|------------------------------|---------------------------------|
| AST   | 49.636             | 37                | 58                | 8.213                    | 25.575                        | 15.067                       | 32.291                       | 6.086                           |
| BBS   | 67.909             | 55                | 96                | 11.211                   | 29.736                        | 22.249                       | 38.416                       | 5.642                           |
| BDC   | 33.455             | 14                | 48                | 10.577                   | 12.778                        | 8.771                        | 18.006                       | 2.256                           |
| BLS   | 87.273             | 77                | 100               | 7.016                    | 32.427                        | 18.932                       | 41.616                       | 5.930                           |
| BRI   | 44.909             | 39                | 53                | 4.437                    | 18.720                        | 16.713                       | 21.040                       | 1.527                           |
| CHA   | 69.727             | 31                | 94                | 21.546                   | 14.286                        | 7.861                        | 19.321                       | 3.888                           |
| COF   | 179.273            | 158               | 199               | 14.423                   | 80.212                        | 59.954                       | 100.391                      | 15.177                          |
| DOS   | 153.364            | 138               | 174               | 11.387                   | 57.967                        | 43.480                       | 72.564                       | 9.286                           |
| GBS   | 25.455             | 8                 | 37                | 9.791                    | 11.104                        | 2.469                        | 17.067                       | 5.463                           |
| GGH   | 105.636            | 83                | 119               | 11.578                   | 55.836                        | 39.538                       | 61.915                       | 6.577                           |
| IDF   | 30.000             | 23                | 40                | 4.940                    | 11.672                        | 9.797                        | 16.044                       | 1.776                           |
| KAM   | 22.273             | 14                | 27                | 4.541                    | 12.190                        | 7.179                        | 19.174                       | 3.772                           |
| KST   | 60.182             | 41                | 70                | 9.765                    | 33.363                        | 25.994                       | 44.909                       | 6.144                           |
| LAC   | 18.091             | 7                 | 40                | 12.446                   | 6.486                         | 2.764                        | 10.629                       | 2.254                           |
| LES   | 80.636             | 66                | 93                | 7.865                    | 37.738                        | 25.730                       | 50.912                       | 8.344                           |
| MFS   | 113.727            | 84                | 133               | 15.749                   | 55.283                        | 39.703                       | 71.966                       | 9.779                           |
| MLS   | 220.545            | 171               | 257               | 22.460                   | 102.225                       | 75.294                       | 112.083                      | 11.220                          |
| MLW   | 41.909             | 28                | 55                | 6.804                    | 18.560                        | 11.891                       | 28.002                       | 4.711                           |
| NOL   | 46.545             | 32                | 60                | 10.492                   | 22.786                        | 16.948                       | 32.134                       | 6.027                           |
| OMS   | 166.273            | 139               | 179               | 12.142                   | 68.826                        | 63.706                       | 76.201                       | 4.376                           |
| OUS   | 105.364            | 95                | 116               | 6.712                    | 64.106                        | 51.850                       | 79.435                       | 8.753                           |
| RHO   | 138.727            | 121               | 158               | 11.136                   | 59.755                        | 47.359                       | 75.045                       | 7.753                           |
| RPL   | 123.364            | 91                | 150               | 17.727                   | 56.831                        | 43.692                       | 69.528                       | 8.378                           |
| SBS   | 14.364             | 11                | 20                | 2.335                    | 6.861                         | 5.180                        | 8.973                        | 1.226                           |
| SKF   | 232.182            | 195               | 247               | 13.884                   | 107.246                       | 81.491                       | 115.904                      | 9.918                           |
| SKU   | 100.636            | 67                | 134               | 19.007                   | 47.219                        | 37.117                       | 56.580                       | 6.284                           |
| SUF   | 263.818            | 193               | 325               | 47.027                   | 97.702                        | 79.857                       | 110.198                      | 8.622                           |
| SWS   | 14.909             | 12                | 20                | 2.386                    | 6.638                         | 4.716                        | 10.385                       | 1.882                           |
| TEX   | 239.000            | 166               | 293               | 41.701                   | 123.099                       | 95.650                       | 140.323                      | 14.932                          |
| WAD   | 49.727             | 40                | 59                | 4.628                    | 25.197                        | 17.885                       | 32.713                       | 4.839                           |
| WBS   | 66.364             | 56                | 85                | 9.069                    | 29.726                        | 24.611                       | 41.190                       | 5.136                           |
| WGH   | 52.636             | 41                | 64                | 7.201                    | 31.063                        | 17.416                       | 38.153                       | 5.654                           |
| WHH   | 63.818             | 55                | 70                | 5.363                    | 30.791                        | 22.776                       | 38.579                       | 4.489                           |
| WKF   | 91.818             | 74                | 109               | 10.515                   | 50.679                        | 46.259                       | 61.842                       | 4.515                           |
| ZWS   | 25.182             | 19                | 37                | 5.135                    | 10.276                        | 6.860                        | 16.098                       | 2.623                           |
