# Supplementary material for: Genetic Diversity and Trends of Ancestral and New Inbreeding in German Sheep Breeds by Pedigree Data
Source: MDPI journal article supplement (doi:10.3390/ani13040623), 2023-02-10
Supplement: s1 [file s1]

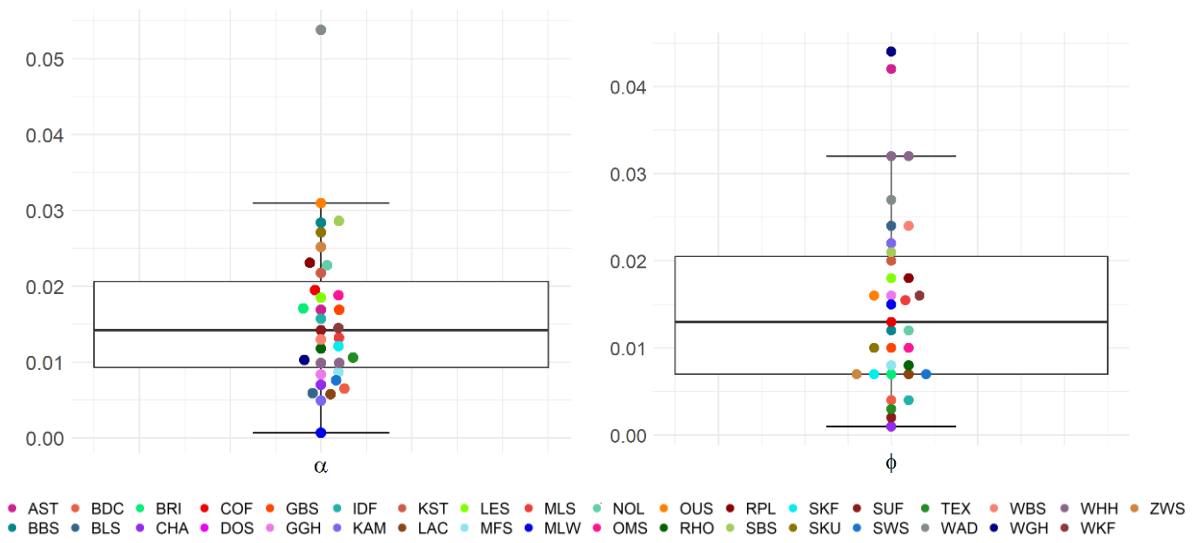

**Figure S2.** Degree of deviation of random mating from Hardy–Weinberg proportion ( $\alpha$ ) and average coancestry within the parental population ( $\Phi$ ) for the reference populations including birth years 2010–2020 in each of the 35 sheep breeds.
