# Supplementary material for: Genetic Diversity and Trends of Ancestral and New Inbreeding in German Sheep Breeds by Pedigree Data
Source: MDPI journal article supplement (doi:10.3390/ani13040623), 2023-02-10
Supplement: s1 [file s1]

**Table S12.** Autochthonous and imported sheep breeds in Germany with their risk levels, sustainable developmental goal (SDG) risk status and their local endangerment status.

| <b>Code</b> | <b>Breed</b>      | <b>Risk level</b>                       | <b>SDG local risk status</b> | <b>Detailed local risk status</b> | <b>Country of origin</b> |
|-------------|-------------------|-----------------------------------------|------------------------------|-----------------------------------|--------------------------|
| AST         | Alpine Steinschaf | at risk                                 | at risk                      | endangered                        | Germany                  |
| BBS         | Brown Mountain    | global not at risk,<br>national at risk | at risk                      | endangered                        | Germany                  |
| BDC         | Berrichon du Cher | global not at risk,<br>national at risk | at risk                      | critical                          | France                   |
| BLS         | Bentheim          | at risk                                 | at risk                      | endangered                        | Germany                  |
| BRI         | Carinthian        | global not at risk,<br>national at risk | at risk                      | endangered                        | Germany                  |
| CHA         | Charollais        | global not at risk,<br>national at risk | at risk                      | endangered                        | France                   |
| COF         | Coburg            | global at risk,<br>national at risk     | at risk                      | vulnerable                        | Germany                  |
| DOS         | Dorper            | global not at risk,<br>national at risk | at risk                      | endangered                        | South Africa             |
| GBS         | Baraka            | global at risk,<br>national at risk     | at risk                      | critical                          | Germany                  |
| GGH         | German Grey Heath | national at risk                        | at risk                      | endangered                        | Germany                  |
| IDF         | Ile-de-France     | national at risk                        | at risk                      | endangered                        | France                   |
| KAM         | Kamerun           | national at risk                        | at risk                      | critical                          | West Africa              |

|     |                         |                                             |             |            |         |
|-----|-------------------------|---------------------------------------------|-------------|------------|---------|
| KST | Krainer Steinschaf      | global not at risk,<br>national at risk     | at risk     | endangered | Germany |
| LAC | Lacaune                 | global not at risk,<br>national at risk     | at risk     | critical   | France  |
| LES | Leine                   | global at risk,<br>national at risk         | at risk     | endangered | Germany |
| MFS | German Mutton Merino    | global not at risk,<br>national at risk     | at risk     | vulnerable | Germany |
| MLS | German Merino           | global not at risk,<br>national not at risk | not at risk |            | Germany |
| MLW | Merino Longwool         | national at risk                            | at risk     | endangered | Germany |
| NOL | Nolana                  | national at risk                            | at risk     | endangered | Germany |
| OMS | East Friesian           | global not at risk,<br>national at risk     | at risk     | endangered | Germany |
| OUS | Ouessant                | global not at risk,<br>national at risk     | at risk     | endangered | France  |
| RHO | Rhön                    | national at risk                            | at risk     | vulnerable | Germany |
| RPL | Pomeranian Coarsewool   | national at risk                            | at risk     | endangered | Germany |
| SBS | Black Mountain          | national at risk                            | at risk     | critical   | Germany |
| SKF | German Blackhead Mutton | global not at risk,<br>national at risk     | at risk     | vulnerable | Germany |
| SKU | Skudde                  | global at risk,<br>national at risk         | at risk     | endangered | Germany |

|     |                         |                                         |         |            |                |
|-----|-------------------------|-----------------------------------------|---------|------------|----------------|
| SUF | Suffolk                 | global not at risk,<br>national at risk | at risk | vulnerable | United Kingdom |
| SWS | Swifter                 | global at risk,<br>national at risk     | at risk | critical   | Holland        |
| TEX | Texel                   | global not at risk,<br>national at risk | at risk | endangered | Holland        |
| WAD | Wald                    | global at risk,<br>national at risk     | at risk | endangered | Germany        |
| WBS | White Mountain          | global not at risk,<br>national at risk | at risk | endangered | Germany        |
| WGH | German White Heath      | national at risk                        | at risk | endangered | Germany        |
| WHH | White Polled Heath      | national at risk                        | at risk | endangered | Germany        |
| WKF | German Whitehead Mutton | national at risk                        | at risk | endangered | Germany        |
| ZWS | Zwartbles               | global not at risk,<br>national at risk | at risk | critical   | Holland        |
