# Supplementary material for: Genetic Diversity and Trends of Ancestral and New Inbreeding in German Sheep Breeds by Pedigree Data
Source: MDPI journal article supplement (doi:10.3390/ani13040623), 2023-02-10
Supplement: s1 [file s1]

**Table S10.** Correlations of measures of inbreeding of animals with inbreeding measures of their sires and dams for each of the 35 sheep breeds.

| Breed | F <sub>a</sub> New-Animal-Sire | F <sub>a</sub> New-Animal-Dam | F <sub>a</sub> Kal-Animal-Sire | F <sub>a</sub> Kal-Animal-Dam |
|-------|--------------------------------|-------------------------------|--------------------------------|-------------------------------|
| AST   | 0.13837                        | 0.06601                       | 0.49270                        | 0.55178                       |
| BBS   | 0.07419                        | 0.07710                       | 0.53921                        | 0.22777                       |
| BDC   | 0.05125                        | -0.01279                      | 0.4645                         | 0.0289                        |
| BLS   | -0.02438                       | 0.07694                       | 0.27409                        | 0.40731                       |
| BRI   | -0.00660                       | 0.03330                       | 0.18763                        | 0.14847                       |
| CHA   | 0.03491                        | 0.00000                       | 0.00294                        | 0.02139                       |
| COF   | 0.00818                        | 0.15090                       | 0.24521                        | 0.39312                       |
| DOS   | 0.08496                        | 0.06601                       | 0.52112                        | 0.51472                       |
| GBS   | -0.07592                       | 0.02063                       | 0.19462                        | 0.33778                       |
| GGH   | -0.02855                       | 0.13541                       | 0.38357                        | 0.51675                       |
| IDF   | 0.02414                        | 0.02108                       | 0.19352                        | 0.08657                       |
| KAM   | 0.05523                        | 0.02372                       | 0.31034                        | 0.24844                       |
| KST   | 0.15901                        | 0.10669                       | 0.48694                        | 0.40385                       |
| LAC   | 0.25131                        | 0.08099                       | 0.30219                        | 0.34816                       |
| LES   | -0.02985                       | 0.02379                       | 0.45041                        | 0.49458                       |
| MFS   | 0.01292                        | 0.07860                       | 0.21648                        | 0.30354                       |
| MLS   | 0.01859                        | 0.06570                       | 0.31097                        | 0.45202                       |
| MLW   | 0.06913                        | 0.02958                       | 0.25778                        | 0.22866                       |
| NOL   | 0.20894                        | 0.14218                       | 0.27668                        | 0.39773                       |
| OMS   | 0.06469                        | 0.10418                       | 0.30886                        | 0.44932                       |
| OUS   | 0.07861                        | 0.07974                       | 0.41796                        | 0.36235                       |
| RHO   | 0.01701                        | 0.05930                       | 0.26803                        | 0.34067                       |
| RPL   | 0.04758                        | 0.03049                       | 0.39663                        | 0.45521                       |
| SBS   | 0.06554                        | 0.06710                       | 0.27460                        | 0.27921                       |
| SKF   | 0.01947                        | 0.00670                       | 0.24631                        | 0.22119                       |
| SKU   | -0.00137                       | 0.07501                       | 0.35124                        | 0.44240                       |
| SUF   | 0.02485                        | 0.02730                       | 0.22783                        | 0.33802                       |
| SWS   | 0.09310                        | 0.03247                       | 0.21757                        | 0.09802                       |
| TEX   | 0.04753                        | 0.03342                       | 0.31418                        | 0.23824                       |
| WAD   | 0.07382                        | 0.05855                       | 0.70530                        | 0.70605                       |
| WBS   | 0.07507                        | 0.09170                       | 0.35525                        | 0.49978                       |
| WGH   | 0.03117                        | 0.14312                       | 0.36861                        | 0.63548                       |
| WHH   | 0.05500                        | 0.11224                       | 0.21255                        | 0.48343                       |
| WKF   | 0.08006                        | 0.05246                       | 0.28569                        | 0.35815                       |
| ZWS   | 0.15553                        | 0.23412                       | 0.35603                        | 0.50122                       |

**Table S11.** Correlations of measures of inbreeding among sires and dams for each of the 35 sheep breeds.

| <b>Breed</b> | <b>F<sub>Sire-Dam</sub></b> | <b>F<sub>a_New-Sire-Dam</sub></b> | <b>F<sub>a_Kal-Sire-Dam</sub></b> | <b>F<sub>a_Bal-Sire-Dam</sub></b> |
|--------------|-----------------------------|-----------------------------------|-----------------------------------|-----------------------------------|
| <b>AST</b>   | 0.04049                     | 0.04736                           | 0.07234                           | 0.12100                           |
| <b>BBS</b>   | 0.02391                     | 0.01999                           | 0.05307                           | 0.17651                           |
| <b>BDC</b>   | 0.03202                     | 0.03268                           | -0.00265                          | 0.03613                           |
| <b>BLS</b>   | -0.00224                    | 0.00419                           | 0.03653                           | 0.15586                           |
| <b>BRI</b>   | -0.01539                    | -0.01620                          | -0.01456                          | 0.08888                           |
| <b>CHA</b>   | -0.00929                    | -0.00914                          | 0.00000                           | -0.00574                          |
| <b>COF</b>   | 0.00959                     | 0.00838                           | 0.02918                           | 0.14127                           |
| <b>DOS</b>   | 0.09852                     | 0.08504                           | 0.10076                           | 0.22255                           |
| <b>GBS</b>   | 0.07162                     | 0.08112                           | 0.03217                           | 0.21770                           |
| <b>GGH</b>   | 0.04272                     | 0.01803                           | 0.18805                           | 0.34799                           |
| <b>IDF</b>   | 0.00286                     | 0.00516                           | -0.00494                          | -0.02863                          |
| <b>KAM</b>   | 0.08806                     | 0.08326                           | 0.07331                           | 0.05273                           |
| <b>KST</b>   | 0.06659                     | 0.07261                           | 0.04322                           | 0.07150                           |
| <b>LAC</b>   | 0.08845                     | 0.08486                           | 0.03965                           | 0.24088                           |
| <b>LES</b>   | 0.00455                     | -0.01583                          | 0.19333                           | 0.49472                           |
| <b>MFS</b>   | 0.02503                     | 0.02327                           | 0.03423                           | 0.12634                           |
| <b>MLS</b>   | 0.03559                     | 0.01543                           | 0.09768                           | 0.13896                           |
| <b>MLW</b>   | 0.01186                     | 0.01268                           | 0.03485                           | 0.12613                           |
| <b>NOL</b>   | 0.03327                     | 0.01769                           | 0.10528                           | 0.17370                           |
| <b>OMS</b>   | 0.09341                     | 0.06926                           | 0.15764                           | 0.36024                           |
| <b>OUS</b>   | 0.05483                     | 0.01202                           | 0.14523                           | 0.31077                           |
| <b>RHO</b>   | 0.09116                     | 0.08543                           | 0.10313                           | 0.28865                           |
| <b>RPL</b>   | 0.09177                     | 0.03336                           | 0.21152                           | 0.38838                           |
| <b>SBS</b>   | -0.03929                    | -0.03982                          | -0.03450                          | 0.10966                           |
| <b>SKF</b>   | 0.01079                     | 0.00445                           | 0.05290                           | 0.09017                           |
| <b>SKU</b>   | 0.08389                     | 0.04167                           | 0.15260                           | 0.31496                           |
| <b>SUF</b>   | 0.03155                     | 0.01960                           | 0.07753                           | 0.14248                           |
| <b>SWS</b>   | -0.04932                    | -0.04818                          | -0.00208                          | -0.05506                          |
| <b>TEX</b>   | 0.02971                     | 0.01021                           | 0.03925                           | 0.18644                           |
| <b>WAD</b>   | 0.22830                     | 0.01404                           | 0.49712                           | 0.38190                           |
| <b>WBS</b>   | 0.10305                     | 0.09025                           | 0.17339                           | 0.23167                           |
| <b>WGH</b>   | 0.16332                     | 0.10158                           | 0.23037                           | 0.26595                           |
| <b>WHH</b>   | -0.03605                    | -0.02564                          | -0.01113                          | 0.11426                           |
| <b>WKF</b>   | -0.00211                    | -0.00644                          | 0.02882                           | 0.19529                           |
| <b>ZWS</b>   | 0.16002                     | 0.09930                           | 0.11352                           | 0.24013                           |
