# Supplementary material for: Genetic Diversity and Trends of Ancestral and New Inbreeding in German Sheep Breeds by Pedigree Data
Source: Animals (Basel). 2023 Feb 10;13(4):623. doi: 10.3390/ani13040623 (PMC9951766; doi:10.3390/ani13040623)
Supplement: Supplementary file 1 [file animals-13-00623-s001.zip]

Archive with 9 entries (9 files):
- Figure S1-Number.pdf
- Figure S2-Coancestry-alpha.pdf
- Figure S3-Inbreeding coefficient.pdf
- Figure S4-rate of inbreeding.pdf
- Figure S5-Ancestral inbreeding.pdf
- Table S1-S8.pdf
- Table S10-S11.pdf
- Table S12-Autochthon imported sheep breeds.pdf
- Table S9_Overview_recent_studies.xlsx
