# Supplementary material for: Genetic Diversity and Trends of Ancestral and New Inbreeding in German Sheep Breeds by Pedigree Data
Source: Animals (Basel). 2023 Feb 10;13(4):623. doi: 10.3390/ani13040623 (PMC9951766; doi:10.3390/ani13040623)
Supplement: Supplementary file 1 [file animals-13-00623-s001.zip › Table S9_Overview_recent_studies.xlsx]

## Sheet: Overview
Table S9. Overview on previous studies analyzing genetic diversity for sheep breeds using pedigree data.
Reference	Breed	Reference animals	GE	GI	Ne	F	f	fe	fa	fg	fe/f	fa/fe	fg/fe	f/fe	fe/fa	fg/fa	f/fg	ΔFi	Realized Ne	comment		References
Addo, at al. 2021 [8]	German Whitehead Mutton	19,000 (17,078)	3.6	3.24	132	0.0102		186	144			0.77								Based on FROH_L estimates, a second genomic effective population size (Ne_ROH) was calculated in the same way as pedigree Ne; by first regressing individual FROH_L estimates on CGE to calculate ΔF. Here, the absolute value ofthe regression coefficient was used to avoid a negative value ofeffective size.		Addo, S., S. Klingel, G. Thaller, and D. Hinrichs. 2021. 'Genetic diversity and the application of runs of homozygosity-based methods for inbreeding estimation in German White-headed Mutton sheep', PLoS One, 16: e0250608.
	males	5426
	females	13574
	Reference population	849	8.05		99	0.035		87	31			0.36						0.00504
Antonios, et al. 2021 [10]	Basco-Béarnaise	16196	4.95			0.04																Antonios, S., S. T. Rodríguez-Ramilo, I. Aguilar, J. M. Astruc, A. Legarra, and Z. G. Vitezica. 2021. 'Genomic and pedigree estimation of inbreeding depression for semen traits in the Basco-Béarnaise dairy sheep breed', J Dairy Sci, 104: 3221-30.
Barros, et al. 2017	Segure˜na	37459	1.23	3.79	46.55	0.006		1120	985	916		0.879464	0.817857		1.12	0.93		0.0107	46.55			Barros, EA, LH de A Brasil, JP Tejero, JV Delgado-Bermejo, and MN Ribeiro. 2017. 'Population structure and genetic variability of the Segureña sheep breed through pedigree analysis and inbreeding effects on growth traits', Small Ruminant Research, 149: 128-33.
Binabaj, 2021	Iranian Baluchi	13633				0.0163																Binabaj, F. B., S. H. Farhangfar, and M. Jafari. 2021. 'Inbreeding affected differently on observations distribution of a growth trait in Iranian Baluchi sheep', Anim Biosci, 34: 506-15.
Brown, et al. 2014	Chios	10492		2.45	76	0.045												0.0065	76	ΔF = ¼Σr2 Ne = 1 /(2ΔF x L)		Brown, C., M. Orford, O. Tzamaloukas, A. P. Mavrogenis, and D. Miltiadou. 2014. 'Assessment of inbreeding resulting from selection for scrapie resistance: a model for rare sheep breeds', Vet Rec, 175: 624.
Danchin-Burge, et al. 2010 [38]	Bleu du Maine	107580	8.1	3.4	231	0.019	698	120	59	22	0.17192	0.491667	0.183333	5.8	2	0.372881	31.6		231			Danchin-Burge, Coralie, Isabelle Palhiere, Dominique François, Bernard Bibé, Grégoire Leroy, and Etienne Verrier. 2010. 'Pedigree analysis of seven small French sheep populations and implications for the management of rare breeds', Journal of animal science, 88: 505-16.
	Charmoise	106589	6.8	3.9	182	0.019	1347	134	50	23	0.0994803	0.373134	0.171642	10.1	2.7	0.46	58.1		182
	Cotentin	10967	4.6	3.3	108	0.024	272	80	46	23	0.294118	0.575	0.2875	3.4	1.7	0.5	11.5		108
	on-farm Romanov	52305	6.2	4.1		0.04	385	40	17	6	0.103896	0.425	0.15	9.6	2.4	0.352941	60.2		78
	Romanov ex situ in vivo	12609	10.5	2.9		0.077	59	31	24	19	0.525424	0.774194	0.612903	1.9	1.3	0.791667	3.1		65
	Roussin de la Hague	53899	5.8	3.5	172	0.024	681	58	39	8	0.0851689	0.672414	0.137931	11.7	1.5	0.205128	82		172
	Solognote	25262	5.5	3.6	154	0.019	568	133	55	26	0.234155	0.413534	0.195489	4.3	2.4	0.472727	21.8		154
Eteqadi, 2015	Guilan	28944					8862															Eteqadi, B., N. Ghavi Hossein-Zadeh, and A. A. Shadparvar. 2015. 'Inbreeding effects on reproductive traits in Iranian Guilan sheep', Trop Anim Health Prod, 47: 533-9.
Ghafouri-Kesbi, 2010 [15]	Zandi	2566	3.15		71	0.0146	121	86	74	41	0.710744	0.860465	0.476744	1.40698	1.16	0.554054	2.95122					Ghafouri-Kesbi, F. 2012. 'Using pedigree information to study genetic diversity and re-evaluating a selection program in an experimental flock of Afshari sheep', Arch. Anim. Breed., 55: 375-84.
Ghafouri-Kesbi, 2012 [16]	Afshari	1714	1.42	3.55	50	0.012	243	40	34	23	0.164609	0.85	0.575	6.075	1.17	0.676471	10.5652					Ghafouri-Kesbi, Farhad. 2010. 'Analysis of genetic diversity in a close population of Zandi sheep using genealogical information', Journal of Genetics, 89: 479.
Gholizadeh, 2016	Baluchi	10863	2.49		166	0.016																Gholizadeh, M. and F. Ghafouri-Kesbi, Inbreeding depression in growth traits of Baluchi sheep. Small Ruminant Research, 2016. 144: p. 184-190.
Gowane, et al. 2013	Bharat Merino	5723	4.95			0.0232	608	55	40		0.0904605	0.727273		11.0545	1.375				89.29			Gowane, GR, Ashish Chopra, SS Misra, and LLL Prince. 2014. 'Genetic diversity of a nucleus flock of Malpura sheep through pedigree analyses', Small Ruminant Research, 120: 35-41.
Gowane, et al. 2014	Malpura	5872	7.21	3.37		0.0332	199	58	36		0.291457	0.62069		3.43	1.61				91.74			Gowane, GR, Ved Prakash, Ashish Chopra, and LLL Prince. 2013. 'Population structure and effect of inbreeding on lamb growth in Bharat Merino sheep', Small Ruminant Research, 114: 72-79.
Goyache, et al. 2003 [13]	Xalda	805	1.09	2.97		0.0154	329	81.1	40.2		0.246505	0.495684		4.05672	20.1741							Goyache, Félix, Juan P Gutiérrez, Itziar Fernández, E Gómez, Isabel Álvarez, J Díez, and LJ Royo. 2003. 'Using pedigree information to monitor genetic variability of endangered populations: the Xalda sheep breed of Asturias as an example', Journal of Animal Breeding and Genetics, 120: 95-105.
Granado-Tajada, et al. 2020	3 selected populations of Latxa dairy sheep																					Granado-Tajada, I., S. T. Rodríguez-Ramilo, A. Legarra, and E. Ugarte. 2020. 'Inbreeding, effective population size, and coancestry in the Latxa dairy sheep breed', J Dairy Sci, 103: 5215-26.
	Latxa Cara Rubia		4.24	4.26		0.0159												0.0022	187
	Latxa Cara Negra		5.61	4.26		0.0183												0.0079	83
	Navarre		4.65	4.65		0.0184												0.0073	81
Illa, 2019 [6]	Nellore	5663	4.23	3.38	91.56	0.0138	232	47	37	22.48	0.202586	0.787234	0.478298	4.94	1.27							Illa, S. K., G. Gollamoori, and S. Nath. 2019. 'Evaluation of selection program by assessing the genetic diversity and inbreeding effects on Nellore sheep growth through pedigree analysis', Asian-Australas J Anim Sci, 33: 1369-77.
Mallick, et al. 2020 [45]	Bharat Merino	9688	5.54	4.19		0.0236	449	56	43						1.302							Mallick, P., et al., Genetic variability of Bharat merino sheep derived from pedigree information. Indian J. Anim. Res, 2020. 54: p. 1324-1331.
Mandal, et al. 2005	Muzaffarnagari	4738			79.1																	Mandal, Ajoy, KP Pant, DR Notter, PK Rout, R Roy, NK Sinha, and N Sharma. 2005. 'Studies on inbreeding and its effects on growth and fleece traits of Muzaffarnagari sheep', Asian-Australasian journal of animal sciences, 18: 1363-67.
	ewes					0.009
	lambs					0.0164
Meyermans, et al. 2020 [40]	Belgium Milk Sheep		8.9	3.3	24													0.028				Meyermans, R, W Gorssen, K Wijnrocx, JA Lenstra, P Vellema, N Buys, and S Janssens. 2020. 'Unraveling the genetic diversity of Belgian Milk Sheep using medium‐density SNP genotypes', Animal genetics, 51: 258-65.
Mokhtari, et al. 2013 [35]	Kermani	3562	2.22	4.48	100	0.0051	420	149	72	48	0.354762	0.483221	0.322148	2.81879	2.06944	0.666667	8.75					Mokhtari, MS, M Moradi Shahrbabak, AK Esmailizadeh, R Abdollahi-Arpanahi, and JP Gutierrez. 2013. 'Genetic diversity in Kermani sheep assessed from pedigree analysis', Small Ruminant Research, 114: 202-05.
Mokhtari, et al. 2014 [41]	Iran-Black	6082	7.10	3.39	28	0.0808	150	13	11	6	0.0866667	0.846154	0.461538	11.5385	1.18	0.545455	25	0.07	27	using two different approaches, the rate of coancestry for all pairs of individual j and k ( Cjk) in a reference population and computed as: Cjk = 1 − (gj+gk/z)  1 − Cjk in which, Cjk is the inbreeding coefficient of a progeny from individuals j and k, and gj and gk are the discrete equivalent generation of individuals j and k, respectively. Consequently, realized effective population size in a …		Mokhtari, MS, M Moradi Shahrbabak, AK Esmailizadeh, H Moradi Shahrbabak, and JP Gutierrez. 2014. 'Pedigree analysis of Iran-Black sheep and inbreeding effects on growth and reproduction traits', Small Ruminant Research, 116: 14-20.
Norberg & Soerensen, 2007	Texel	81,249 (29,336)		3.1		0.057												0.011				Norberg, E., and A. C. Sørensen. 2007. 'Inbreeding trend and inbreeding depression in the Danish populations of Texel, Shropshire, and Oxford Down1', Journal of animal science, 85: 299-304.
	Shropshire	59,800 (22,838)		3.5		0.102												0.011
	Oxford Down	49,754 (11,487)		3.7		0.078												0.01
	mean
Oravcova, 2011 [7]	Valachian	137	1.16	4.07		0.0169	62	20	5		0.322581	0.25		3.1	4			0.0243	20.6			Oravcova, M, and E Krupa. 2011. 'Pedigree analysis of the former Valachian sheep', Slovak Journal of Animal Science, 44: 6-12.
Pedrosa, et al. 2010 [14]	Santa Inês	17097	2.26			0.0233		211	156			0.739336			1.35				76			Pedrosa, VB, ML Santana Jr, PS Oliveira, JP Eler, and JBS Ferraz. 2010. 'Population structure and inbreeding effects on growth traits of Santa Inês sheep in Brazil', Small Ruminant Research, 93: 135-39.
Rego Neto, et al. 2016	Santa Inês	20206		5.3		0.0097		199	161			0.809045			1.23602				68			Rego Neto, A. A., J. L. Rocha Sarmento, N. Pereira da Silva Santos, J. E. Guimarães Campelo, L. Silva Sena, D. Biagiotti, and G. Vieira Dos Santos. 2018. 'Population genetic structure of Santa Inês sheep in Brazil', Trop Anim Health Prod, 50: 503-08.
Rodriguez-Ramilo, 2019 [39]	Lacaune Confederation	29255	10.84		263	0.0311												0.0022	263	rates of inbreeding per year were computed from the regression coefficient of the inbreeding coefficient for each individual on the year of birth; Ne = 1/(2ΔF)		Rodríguez-Ramilo, S. T., J. M. Elsen, and A. Legarra. 2019. 'Inbreeding and effective population size in French dairy sheep: Comparison between genomic and pedigree estimates', J Dairy Sci, 102: 4227-37.
	Lacaune Ovitest	28497	11.69		227	0.0234												0.0019	227
	Manech Tete Rousse	11574	7.61		111	0.0239												0.0045	111
	Manech Tete Noire	1616	5.29		53	0.0298												0.0094	53
	Basco-Béarnaise	1861	6.1		51	0.0296												0.0099	51
Sheikhlou, 2016 [43]	Iranian Lori-Bakhtiari	6846	4.93	3.42		0.0102	273	77	43	21	0.282051	0.558442	0.272727	3.54545	1.8		13	0.0017	101	The increase in pairwise coancestry for any pair of individuals j and k, belonging to different sexes in the reference population was computed as: ΔC_jk =1- ((g_j+ g_k)/2) √(1-C_jk ) where cjk is the inbreeding of a descendent from both, and gj and gk are the equivalent complete generations for the parents. The global C was computed by averaging the increase in coansectry for all pairs of individ…		Sheikhlou, M, and MA Abbasi. 2016. 'Genetic diversity of Iranian Lori-Bakhtiari sheep assessed by pedigree analysis', Small Ruminant Research, 141: 99-105.
Tahmoorespur, 2011 [42]	Iranian Baluchi	21721	5.47	3.33	134	0.0179	347	80	47	19.5	0.230548	0.5875	0.24375	4.3375	1.70213		17.7949	0.002	134			Tahmoorespur, Mojtaba, and M Sheikhloo. 2011. 'Pedigree analysis of the closed nucleus of Iranian Baluchi sheep', Small Ruminant Research, 99: 1-6.
Sattaei Mokhtari, et al. 2015	Moghani	9457	3.37	4.48	226 (276)	0.004	504	143	117	67												Sattaei Mokhtari, M, SR Miraei-Ashtiani, M Jafaroghli, and JP Gutiérrez. 2015. 'Studying genetic diversity in Moghani sheep using pedigree analysis', Journal of Agricultural Science and Technology, 17: 1151-60.
Dorostkar, et al. 2012	Moghani	8836				0.005																Dorostkar, M, J Shodja, SA Rafat, M Rokouei, and H Esfandyari. 2012. 'Inbreeding and inbreeding depression in Iranian Moghani sheep breed', Journal of Agricultural Science and Technology, 14: 549-56.
Hossein-Zadeh, 2012	Moghani	8494				0.0291	1835															Hossein-Zadeh, N Ghavi. 2012. 'Inbreeding effects on body weight traits of Iranian Moghani sheep', Archives Animal Breeding, 55: 171-78.
Rochus, 2017 [2]	Swedish Gute	70474		3.6	155.4	0.038																Rochus, C. M., and A. M. Johansson. 2017. 'Estimation of genetic diversity in Gute sheep: pedigree and microsatellite analyses of an ancient Swedish breed', Hereditas, 154: 4.
	males			3.7	152.8		575	204.6	109.6	45.5	0.355826	0.535679	0.222385	2.81036	1.86679	0.222385	12.6374
	females			3.5	157.7		715	225.7	122.1	52.8	0.315664	0.540984	0.233939	3.16792	1.84848	0.233939	13.5477
Venkataramanan, et al. 2013	Nilagiri	5051	3.75	3.36	Ne Regression over birth date 544.54 Maximum generations 298.83 Complete generations 53.21 Equivalent generations 90.34 Individual increase in inbreeding 97.25	0.0217		59	41													Venkataramanan, R., et al., Pedigree analysis of the Nilagiri sheep of South India. Animal Genetic Resources/Resources génétiques animales/Recursos genéticos animales, 2013. 53: p. 11-18.
Venkataramanan, et al. 2016	Nilagiri	5051	3.75	3.36		0.0217												0.0065				Venkataramanan, R., et al., Effect of inbreeding and individual increase in inbreeding on growth in Nilagiri and Sandyno breeds of sheep. Animal Genetic Resources/Resources génétiques animales/Recursos genéticos animales, 2016. 58: p. 63-71.
	Sandyno	9921	2.52	3.73		0.0083												0.0033
Ne: effective popualtion size; F: inbreeding coefficient; f: number of founders; fe: effective number of founders; fa: effective number of ancestors; fg: effective number of founders genomes; ∆Fi depended on GE and corresponding realized Ne was calculated according to Gutiérrez, et al., using given values for GE and F and the following formulas: ∆Fi=1-(GE-1√(1-F)) and Ne=1/(2x∆Fi.)
